# Supplementary material for: Characterization and Comparative Genomic Analysis of Three Virulent E. coli Bacteriophages with the Potential to Reduce Antibiotic-Resistant Bacteria in the Environment
Source: MDPI journal article supplement (doi:10.3390/ijms24065696), 2023-03-16
Supplement: s1 [file s1]

(a)

## BF9\_new PhageTerm Analysis

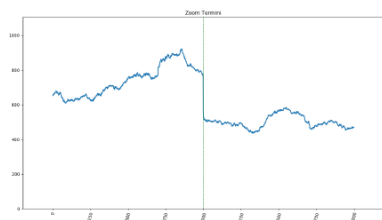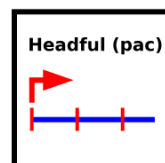

## PhageTerm Method

| Ends      | Left (red)  | Right (green) | Permuted | Orientation | Class         | Type |
|-----------|-------------|---------------|----------|-------------|---------------|------|
| Redundant | Distributed | 28168         | Yes      | Reverse     | Headful (pac) | P1   |

| Strand | Location | T    | pvalue   | T (Start. Pos. Cov. / Whole Cov.) |
|--------|----------|------|----------|-----------------------------------|
| +      | 4381     | 0.04 | 1.00e+00 | strand (+)                        |
|        | 37563    | 0.03 | 1.00e+00 |                                   |
|        | 35182    | 0.03 | 1.00e+00 |                                   |
|        | 15890    | 0.03 | 1.00e+00 |                                   |
|        | 16012    | 0.03 | 1.00e+00 |                                   |
| -      | 28168    | 0.53 | 8.06e-65 | strand (-)                        |
|        | 38030    | 0.04 | 3.27e-02 |                                   |
|        | 35314    | 0.03 | 1.00e+00 |                                   |
|        | 6351     | 0.03 | 1.00e+00 |                                   |
|        | 13386    | 0.03 | 1.00e+00 |                                   |

## Li's Method

| Packaging | Termini | Forward              | Reverse         | Orientation |
|-----------|---------|----------------------|-----------------|-------------|
| PAC       | Fixed   | Multiple-Pref. Term. | Obvious Termini | Reverse     |

(b)

## BF15 PhageTerm Analysis

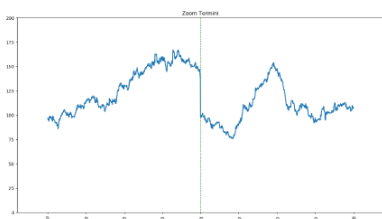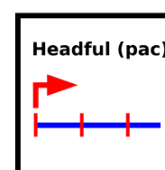

## PhageTerm Method

| Ends      | Left (red)  | Right (green) | Permuted | Orientation | Class         | Type |
|-----------|-------------|---------------|----------|-------------|---------------|------|
| Redundant | Distributed | 31929         | Yes      | Reverse     | Headful (pac) | P1   |

| Strand | Location | T    | pvalue   | T (Start. Pos. Cov. / Whole Cov.) |
|--------|----------|------|----------|-----------------------------------|
| +      | 89661    | 0.22 | 7.05e-03 | strand (+)                        |
|        | 106113   | 0.21 | 8.35e-04 |                                   |
|        | 64992    | 0.18 | 9.41e-02 |                                   |
|        | 146351   | 0.16 | 1.00e+00 |                                   |
|        | 155006   | 0.15 | 2.13e-01 |                                   |
| -      | 31929    | 0.38 | 2.93e-08 | strand (-)                        |
|        | 24329    | 0.19 | 1.00e+00 |                                   |
|        | 9398     | 0.17 | 1.00e+00 |                                   |
|        | 44358    | 0.17 | 3.97e-01 |                                   |
|        | 36015    | 0.16 | 1.00e+00 |                                   |

(c)

### BF17 PhageTerm Analysis

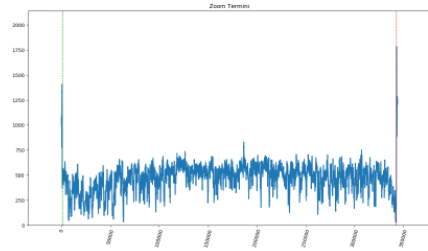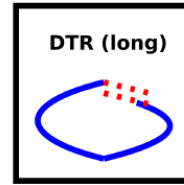

#### PhageTerm Method

| Ends      | Left (red) | Right (green) | Permuted | Orientation | Class      | Type |
|-----------|------------|---------------|----------|-------------|------------|------|
| Redundant | 343150     | 838           | No       | NA          | DTR (long) | T5   |

\*Direct Terminal Repeats: 20590 bp

| Strand | Location | T    | pvalue    | T (Start. Pos. Cov. / Whole Cov.) |  |
|--------|----------|------|-----------|-----------------------------------|--|
| +      | 343150   | 0.76 | 0.00e+00  |                                   |  |
|        | 328452   | 0.04 | 1.00e+00  |                                   |  |
|        | 256072   | 0.04 | 1.00e+00  |                                   |  |
|        | 178079   | 0.04 | 1.00e+00  |                                   |  |
|        | 307012   | 0.04 | 1.00e+00  |                                   |  |
| -      | 838      | 0.61 | 3.89e-159 |                                   |  |
|        | 95609    | 0.04 | 1.00e+00  |                                   |  |
|        | 279233   | 0.04 | 1.00e+00  |                                   |  |
|        | 218577   | 0.04 | 5.38e-01  |                                   |  |
|        | 104749   | 0.03 | 1.00e+00  |                                   |  |

**Figure S1.** PhageTerm analysis of the BF9 (a), BF15 (b), and BF17 (c) sequence read data demonstrating the genome packaging mechanism.
