# Supplementary material for: Characterization and Comparative Genomic Analysis of Three Virulent E. coli Bacteriophages with the Potential to Reduce Antibiotic-Resistant Bacteria in the Environment
Source: MDPI journal article supplement (doi:10.3390/ijms24065696), 2023-03-16
Supplement: s1 [file s1]

**Table S3** List of genes shared by phages BF9, BF15, and BF17 with the most representative phages of the genus performed with CoreGenes5.0

| <b>Escherichia phage BF9</b><br><b><u>MW822006.1</u></b>                          | <b>Escherichia phage HK578</b><br><b><u>JQ086375.1</u></b>                              |
|-----------------------------------------------------------------------------------|-----------------------------------------------------------------------------------------|
| PI: <u><a href="#">QXL91276.1</a></u><br>Product:putative lipoprotein             | PI: <u><a href="#">AFH20529.1</a></u><br>Product:hypothetical protein                   |
| PI: <u><a href="#">QXL91277.1</a></u><br>Product:hypothetical protein             | PI: <u><a href="#">AFH20528.1</a></u><br>Product:hypothetical protein                   |
| PI: <u><a href="#">QXL91278.1</a></u><br>Product:putative tail fiber tip protein  | PI: <u><a href="#">AFH20527.1</a></u><br>Product:bacteriophage host specificity protein |
| PI: <u><a href="#">QXL91279.1</a></u><br>Product:tail assembly protein            | PI: <u><a href="#">AFH20526.1</a></u><br>Product:tail assembly protein                  |
| PI: <u><a href="#">QXL91280.1</a></u><br>Product:minor tail protein               | PI: <u><a href="#">AFH20525.1</a></u><br>Product:tail component protein                 |
| PI: <u><a href="#">QXL91281.1</a></u><br>Product:minor tail protein               | PI: <u><a href="#">AFH20524.1</a></u><br>Product:minor tail protein                     |
| PI: <u><a href="#">QXL91282.1</a></u><br>Product:tail length tape measure protein | PI: <u><a href="#">AFH20522.1</a></u><br>Product:tail length tape measure protein       |
| PI: <u><a href="#">QXL91283.1</a></u><br>Product:hypothetical protein             | PI: <u><a href="#">AFH20521.1</a></u><br>Product:hypothetical protein                   |
| PI: <u><a href="#">QXL91284.1</a></u><br>Product:hypothetical protein             | PI: <u><a href="#">AFH20520.1</a></u><br>Product:hypothetical protein                   |
| PI: <u><a href="#">QXL91285.1</a></u><br>Product:major tail protein               | PI: <u><a href="#">AFH20519.1</a></u><br>Product:tail protein                           |
| PI: <u><a href="#">QXL91286.1</a></u><br>Product:hypothetical protein             | PI: <u><a href="#">AFH20518.1</a></u><br>Product:hypothetical protein                   |
| PI: <u><a href="#">QXL91287.1</a></u><br>Product:tail protein                     | PI: <u><a href="#">AFH20517.1</a></u><br>Product:hypothetical protein                   |
| PI: <u><a href="#">QXL91288.1</a></u><br>Product:hypothetical protein             | PI: <u><a href="#">AFH20516.1</a></u><br>Product:hypothetical protein                   |
| PI: <u><a href="#">QXL91289.1</a></u><br>Product:hypothetical protein             | PI: <u><a href="#">AFH20514.1</a></u><br>Product:hypothetical protein                   |
| PI: <u><a href="#">QXL91290.1</a></u><br>Product:major head protein               | PI: <u><a href="#">AFH20513.1</a></u><br>Product:major head protein                     |
| PI: <u><a href="#">QXL91291.1</a></u><br>Product:hypothetical protein             | PI: <u><a href="#">AFH20512.1</a></u><br>Product:hypothetical protein                   |
| PI: <u><a href="#">QXL91293.1</a></u><br>Product:hypothetical protein             | PI: <u><a href="#">AFH20510.1</a></u><br>Product:hypothetical protein                   |
| PI: <u><a href="#">QXL91294.1</a></u><br>Product:head morphogenesis protein       | PI: <u><a href="#">AFH20509.1</a></u><br>Product:head morphogenesis protein             |
| PI: <u><a href="#">QXL91295.1</a></u><br>Product:structural protein               | PI: <u><a href="#">AFH20508.1</a></u><br>Product:hypothetical protein                   |
| PI: <u><a href="#">QXL91296.1</a></u><br>Product:terminase large subunit          | PI: <u><a href="#">AFH20507.1</a></u><br>Product:terminase large subunit                |
| PI: <u><a href="#">QXL91297.1</a></u><br>Product:terminase small subunit          | PI: <u><a href="#">AFH20506.1</a></u><br>Product:terminase small subunit                |

|                                                                                          |                                                                                    |
|------------------------------------------------------------------------------------------|------------------------------------------------------------------------------------|
| PI: <a href="#"><u>QXL91298.1</u></a><br>Product:hypothetical protein                    | PI: <a href="#"><u>AFH20565.1</u></a><br>Product:hypothetical protein              |
| PI: <a href="#"><u>QXL91299.1</u></a><br>Product:HTH luxR-type domain-containing protein | PI: <a href="#"><u>AFH20564.1</u></a><br>Product:hypothetical protein              |
| PI: <a href="#"><u>QXL91301.1</u></a><br>Product:lysozyme                                | PI: <a href="#"><u>AFH20562.1</u></a><br>Product:lysozyme                          |
| PI: <a href="#"><u>QXL91302.1</u></a><br>Product:hypothetical protein                    | PI: <a href="#"><u>AFH20561.1</u></a><br>Product:hypothetical protein              |
| PI: <a href="#"><u>QXL91303.1</u></a><br>Product:hypothetical protein                    | PI: <a href="#"><u>AFH20560.1</u></a><br>Product:hypothetical protein              |
| PI: <a href="#"><u>QXL91304.1</u></a><br>Product:hypothetical protein                    | PI: <a href="#"><u>AFH20559.1</u></a><br>Product:hypothetical protein              |
| PI: <a href="#"><u>QXL91306.1</u></a><br>Product:hypothetical protein                    | PI: <a href="#"><u>AFH20554.1</u></a><br>Product:hypothetical protein              |
| PI: <a href="#"><u>QXL91308.1</u></a><br>Product:DNA helicase                            | PI: <a href="#"><u>AFH20551.1</u></a><br>Product:hypothetical protein              |
| PI: <a href="#"><u>QXL91309.1</u></a><br>Product:hypothetical protein                    | PI: <a href="#"><u>AFH20550.1</u></a><br>Product:hypothetical protein              |
| PI: <a href="#"><u>QXL91310.1</u></a><br>Product:hypothetical protein                    | PI: <a href="#"><u>AFH20549.1</u></a><br>Product:hypothetical protein              |
| PI: <a href="#"><u>QXL91311.1</u></a><br>Product:hypothetical protein                    | PI: <a href="#"><u>AFH20548.1</u></a><br>Product:hypothetical protein              |
| PI: <a href="#"><u>QXL91313.1</u></a><br>Product:hypothetical protein                    | PI: <a href="#"><u>AFH20546.1</u></a><br>Product:hypothetical protein              |
| PI: <a href="#"><u>QXL91315.1</u></a><br>Product:hypothetical protein                    | PI: <a href="#"><u>AFH20545.1</u></a><br>Product:hypothetical protein              |
| PI: <a href="#"><u>QXL91316.1</u></a><br>Product:hypothetical protein                    | PI: <a href="#"><u>AFH20544.1</u></a><br>Product:hypothetical protein              |
| PI: <a href="#"><u>QXL91317.1</u></a><br>Product:DNA polymerase                          | PI: <a href="#"><u>AFH20543.1</u></a><br>Product:hypothetical protein              |
| PI: <a href="#"><u>QXL91319.1</u></a><br>Product:VRR-NUC domain-containing protein       | PI: <a href="#"><u>AFH20541.1</u></a><br>Product:hypothetical protein              |
| PI: <a href="#"><u>QXL91320.1</u></a><br>Product:hypothetical protein                    | PI: <a href="#"><u>AFH20540.1</u></a><br>Product:hypothetical protein              |
| PI: <a href="#"><u>QXL91321.1</u></a><br>Product:hypothetical protein                    | PI: <a href="#"><u>AFH20539.1</u></a><br>Product:hypothetical protein              |
| PI: <a href="#"><u>QXL91322.1</u></a><br>Product:DNA helicase                            | PI: <a href="#"><u>AFH20538.1</u></a><br>Product:hypothetical protein              |
| PI: <a href="#"><u>QXL91323.1</u></a><br>Product:hypothetical protein                    | PI: <a href="#"><u>AFH20537.1</u></a><br>Product:hypothetical protein              |
| PI: <a href="#"><u>QXL91324.1</u></a><br>Product:HNH endonuclease                        | PI: <a href="#"><u>AFH20536.1</u></a><br>Product:hypothetical protein              |
| PI: <a href="#"><u>QXL91327.1</u></a><br>Product:DNA N-6-adenine methyltransferase       | PI: <a href="#"><u>AFH20535.1</u></a><br>Product:DNA N-6-adenine-methyltransferase |
| PI: <a href="#"><u>QXL91328.1</u></a><br>Product:hypothetical protein                    | PI: <a href="#"><u>AFH20534.1</u></a><br>Product:hypothetical protein              |
| PI: <a href="#"><u>QXL91329.1</u></a><br>Product:hypothetical protein                    | PI: <a href="#"><u>AFH20533.1</u></a><br>Product:hypothetical protein              |

|                                                                       |                                                                       |
|-----------------------------------------------------------------------|-----------------------------------------------------------------------|
| PI: <a href="#"><u>QXL91330.1</u></a><br>Product:hypothetical protein | PI: <a href="#"><u>AFH20532.1</u></a><br>Product:hypothetical protein |
| PI: <a href="#"><u>QXL91331.1</u></a><br>Product:hypothetical protein | PI: <a href="#"><u>AFH20531.1</u></a><br>Product:hypothetical protein |

| <b>Escherichia phage BF15</b><br><b><u>MW822007.1</u></b>                                 | <b>Escherichia phage T4</b><br><b><u>NC_000866.4</u></b>                                       |
|-------------------------------------------------------------------------------------------|------------------------------------------------------------------------------------------------|
| PI: <a href="#"><u>QXN75718.1</u></a><br>Product:exonuclease A                            | PI: <a href="#"><u>NP_049629.1</u></a><br>Product:3'-5' exoribonuclease                        |
| PI: <a href="#"><u>QXN75719.1</u></a><br>Product:exonuclease                              | PI: <a href="#"><u>NP_049630.1</u></a><br>Product:DexA.1 hypothetical protein                  |
| PI: <a href="#"><u>QXN75720.1</u></a><br>Product:exonuclease                              | PI: <a href="#"><u>NP_049631.1</u></a><br>Product:dextranase                                   |
| PI: <a href="#"><u>QXN75721.1</u></a><br>Product:DNA helicase                             | PI: <a href="#"><u>NP_049632.1</u></a><br>Product:AAA family ATPase                            |
| PI: <a href="#"><u>QXN75722.1</u></a><br>Product:hypothetical protein                     | PI: <a href="#"><u>NP_049633.1</u></a><br>Product:Dda.1 hypothetical protein                   |
| PI: <a href="#"><u>QXN75723.1</u></a><br>Product:hypothetical protein                     | PI: <a href="#"><u>NP_049634.1</u></a><br>Product:Srd anti-sigma factor                        |
| PI: <a href="#"><u>QXN75724.1</u></a><br>Product:NAD--protein ADP-ribosyltransferase      | PI: <a href="#"><u>NP_049635.1</u></a><br>Product:ModA RNA polymerase ADP-ribosylase           |
| PI: <a href="#"><u>QXN75725.1</u></a><br>Product:NAD--protein ADP-ribosyltransferase      | PI: <a href="#"><u>NP_049636.1</u></a><br>Product:ModB ADP-ribosylase                          |
| PI: <a href="#"><u>QXN75726.1</u></a><br>Product:hypothetical protein                     | PI: <a href="#"><u>NP_049637.1</u></a><br>Product:hypothetical protein                         |
| PI: <a href="#"><u>QXN75727.1</u></a><br>Product:hypothetical protein                     | PI: <a href="#"><u>NP_049638.1</u></a><br>Product:ModA.3 hypothetical protein                  |
| PI: <a href="#"><u>QXN75728.1</u></a><br>Product:hypothetical protein                     | PI: <a href="#"><u>NP_049639.1</u></a><br>Product:ModA.4 hypothetical protein                  |
| PI: <a href="#"><u>QXN75729.1</u></a><br>Product:hypothetical protein                     | PI: <a href="#"><u>NP_049640.1</u></a><br>Product:Srh transcription modulator                  |
| PI: <a href="#"><u>QXN75730.1</u></a><br>Product:transcription modulator under heat shock | PI: <a href="#"><u>NP_049641.1</u></a><br>Product:Mrh transcription modulator under heat shock |
| PI: <a href="#"><u>QXN75731.1</u></a><br>Product:hypothetical protein                     | PI: <a href="#"><u>NP_049642.1</u></a><br>Product:Mrh.1 hypothetical protein                   |
| PI: <a href="#"><u>QXN75732.1</u></a><br>Product:hypothetical protein                     | PI: <a href="#"><u>NP_049643.1</u></a><br>Product:Mrh.2 hypothetical protein                   |
| PI: <a href="#"><u>QXN75733.1</u></a><br>Product:small outer capsid protein               | PI: <a href="#"><u>NP_049644.1</u></a><br>Product:Soc small outer capsid protein               |
| PI: <a href="#"><u>QXN75734.1</u></a><br>Product:dCTP pyrophosphatase                     | PI: <a href="#"><u>NP_049646.1</u></a><br>Product:dUTP diphosphatase                           |
| PI: <a href="#"><u>QXN75735.1</u></a><br>Product:DNA methyltransferase                    | PI: <a href="#"><u>NP_049647.1</u></a><br>Product:Dam family site-specific                     |
| PI: <a href="#"><u>QXN75738.1</u></a><br>Product:DNA primase                              | PI: <a href="#"><u>NP_049648.1</u></a><br>Product:DNA primase subunit                          |
| PI: <a href="#"><u>QXN75739.1</u></a><br>Product:hypothetical protein                     | PI: <a href="#"><u>NP_049649.1</u></a><br>Product:gp61.1 hypothetical protein                  |

|                                                                                      |                                                                                                  |
|--------------------------------------------------------------------------------------|--------------------------------------------------------------------------------------------------|
| PI: <a href="#"><u>QXN75741.1</u></a><br>Product:spackle periplasmic protein         | PI: <a href="#"><u>NP_049651.1</u></a><br>Product:sp spackle periplasmic protein                 |
| PI: <a href="#"><u>QXN75742.1</u></a><br>Product:hypothetical protein                | PI: <a href="#"><u>NP_049652.1</u></a><br>Product:gp61.4 hypothetical protein                    |
| PI: <a href="#"><u>QXN75743.1</u></a><br>Product:hypothetical protein                | PI: <a href="#"><u>NP_049653.1</u></a><br>Product:Dmd discriminator of mRNA degradation          |
| PI: <a href="#"><u>QXN75744.1</u></a><br>Product:DNA primase-helicase subunit        | PI: <a href="#"><u>NP_049654.1</u></a><br>Product:AAA family ATPase                              |
| PI: <a href="#"><u>QXN75745.1</u></a><br>Product:head vertiex assembly chaperone     | PI: <a href="#"><u>NP_049655.1</u></a><br>Product:gp40 head vertex assembly chaperone            |
| PI: <a href="#"><u>QXN75746.1</u></a><br>Product:recombination protein               | PI: <a href="#"><u>NP_049656.2</u></a><br>Product:recombinase RecA                               |
| PI: <a href="#"><u>QXN75749.1</u></a><br>Product:thymidylate synthase                | PI: <a href="#"><u>NP_049659.1</u></a><br>Product:thymidylate synthase                           |
| PI: <a href="#"><u>QXN75750.1</u></a><br>Product:immunity to superinfection protein  | PI: <a href="#"><u>NP_049660.1</u></a><br>Product:superinfection immunity protein                |
| PI: <a href="#"><u>QXN75751.1</u></a><br>Product:immunity protein                    | PI: <a href="#"><u>NP_049661.1</u></a><br>Product:iduronate sulfatase                            |
| PI: <a href="#"><u>QXN75752.1</u></a><br>Product:DNA polymerase                      | PI: <a href="#"><u>NP_049662.1</u></a><br>Product:DNA polymerase                                 |
| PI: <a href="#"><u>QXN75753.1</u></a><br>Product:translation repressor protein       | PI: <a href="#"><u>NP_049663.1</u></a><br>Product:translational repressor RegA                   |
| PI: <a href="#"><u>QXN75754.1</u></a><br>Product:sliding-clamp-loader subunit        | PI: <a href="#"><u>NP_049664.1</u></a><br>Product:DNA polymerase clamp loader subunit A          |
| PI: <a href="#"><u>QXN75755.1</u></a><br>Product:sliding-clamp-loader subunit        | PI: <a href="#"><u>NP_049665.1</u></a><br>Product:AAA family ATPase                              |
| PI: <a href="#"><u>QXN75756.1</u></a><br>Product:DNA polymerase clamp                | PI: <a href="#"><u>NP_049666.1</u></a><br>Product:sliding clamp                                  |
| PI: <a href="#"><u>QXN75757.1</u></a><br>Product:RNA polymerase-binding protein      | PI: <a href="#"><u>NP_049667.1</u></a><br>Product:RNA polymerase-binding protein RpbA            |
| PI: <a href="#"><u>QXN75758.1</u></a><br>Product:hypothetical protein                | PI: <a href="#"><u>NP_049668.1</u></a><br>Product:protein GP45.2                                 |
| PI: <a href="#"><u>QXN75759.1</u></a><br>Product:recombination exonuclease subunit 2 | PI: <a href="#"><u>NP_049669.1</u></a><br>Product:AAA family ATPase                              |
| PI: <a href="#"><u>QXN75760.1</u></a><br>Product:hypothetical protein                | PI: <a href="#"><u>NP_049670.1</u></a><br>Product:DUF5487 family protein                         |
| PI: <a href="#"><u>QXN75761.1</u></a><br>Product:hypothetical protein                | PI: <a href="#"><u>NP_049671.1</u></a><br>Product:gp46.2 hypothetical protein                    |
| PI: <a href="#"><u>QXN75762.1</u></a><br>Product:recombination exonuclease subunit 1 | PI: <a href="#"><u>NP_049672.1</u></a><br>Product:metallophosphoesterase                         |
| PI: <a href="#"><u>QXN75763.1</u></a><br>Product:membrane protein                    | PI: <a href="#"><u>NP_813808.1</u></a><br>Product:gp47.1 hypothetical predicted membrane protein |
| PI: <a href="#"><u>QXN75764.1</u></a><br>Product:DNA alpha-glucosyltransferase       | PI: <a href="#"><u>NP_049673.1</u></a><br>Product:a-gt alpha glucosyl transferase                |
| PI: <a href="#"><u>QXN75765.1</u></a><br>Product:hypothetical protein                | PI: <a href="#"><u>NP_049675.1</u></a><br>Product:a-gt.2 hypothetical protein                    |

|                                                                                                  |                                                                                                    |
|--------------------------------------------------------------------------------------------------|----------------------------------------------------------------------------------------------------|
| PI: <a href="#"><u>QXN75766.1</u></a><br>Product:hypothetical protein                            | PI: <a href="#"><u>NP_049676.1</u></a><br>Product:a-gt.3 hypothetical protein                      |
| PI: <a href="#"><u>QXN75767.1</u></a><br>Product:hypothetical protein                            | PI: <a href="#"><u>NP_049677.1</u></a><br>Product:a-gt.4 family protein                            |
| PI: <a href="#"><u>QXN75768.1</u></a><br>Product:hypothetical protein                            | PI: <a href="#"><u>NP_049678.1</u></a><br>Product:a-gt.5 hypothetical protein                      |
| PI: <a href="#"><u>QXN75769.1</u></a><br>Product:RNA polymerase sigma factor                     | PI: <a href="#"><u>NP_049679.1</u></a><br>Product:RNA polymerase sigma factor                      |
| PI: <a href="#"><u>QXN75771.1</u></a><br>Product:hypothetical protein                            | PI: <a href="#"><u>NP_049680.1</u></a><br>Product:gp55.1 hypothetical protein                      |
| PI: <a href="#"><u>QXN75772.1</u></a><br>Product:hypothetical protein                            | PI: <a href="#"><u>NP_049681.1</u></a><br>Product:gp55.2 hypothetical protein                      |
| PI: <a href="#"><u>QXN75773.1</u></a><br>Product:hypothetical protein                            | PI: <a href="#"><u>NP_049682.1</u></a><br>Product:gp55.3 hypothetical protein                      |
| PI: <a href="#"><u>QXN75774.1</u></a><br>Product:hypothetical protein                            | PI: <a href="#"><u>NP_049683.1</u></a><br>Product:gp55.4 conserved hypothetical protein            |
| PI: <a href="#"><u>QXN75775.1</u></a><br>Product:hypothetical protein                            | PI: <a href="#"><u>NP_049684.1</u></a><br>Product:gp55.5 conserved protein of unknown function     |
| PI: <a href="#"><u>QXN75776.1</u></a><br>Product:hypothetical protein                            | PI: <a href="#"><u>NP_049685.1</u></a><br>Product:gp55.6 conserved hypothetical protein            |
| PI: <a href="#"><u>QXN75777.1</u></a><br>Product:glutaredoxin                                    | PI: <a href="#"><u>NP_049686.1</u></a><br>Product:NrdH glutaredoxin                                |
| PI: <a href="#"><u>QXN75778.1</u></a><br>Product:hypothetical protein                            | PI: <a href="#"><u>NP_049687.1</u></a><br>Product:gp55.8 conserved hypothetical predicted membrane |
| PI: <a href="#"><u>QXN75780.1</u></a><br>Product:anaerobic ribonucleoside-triphosphate           | PI: <a href="#"><u>NP_049688.1</u></a><br>Product:anaerobic ribonucleoside-triphosphate reductase  |
| PI: <a href="#"><u>QXN75782.1</u></a><br>Product:anaerobic ribonucleoside-triphosphate reductase | PI: <a href="#"><u>NP_049690.1</u></a><br>Product:anaerobic ribonucleoside-triphosphate reductase  |
| PI: <a href="#"><u>QXN75783.1</u></a><br>Product:recombination endonuclease VII                  | PI: <a href="#"><u>NP_049692.1</u></a><br>Product:recombination endonuclease VII                   |
| PI: <a href="#"><u>QXN75784.1</u></a><br>Product:peptidase inhibitor                             | PI: <a href="#"><u>NP_049694.1</u></a><br>Product:peptidase                                        |
| PI: <a href="#"><u>QXN75785.1</u></a><br>Product:hypothetical protein                            | PI: <a href="#"><u>NP_049695.1</u></a><br>Product:gp49.1 conserved protein of unknown function     |
| PI: <a href="#"><u>QXN75788.1</u></a><br>Product:thioredoxin                                     | PI: <a href="#"><u>NP_049698.1</u></a><br>Product:NrdC thioredoxin                                 |
| PI: <a href="#"><u>QXN75789.1</u></a><br>Product:thioredoxin                                     | PI: <a href="#"><u>NP_049699.1</u></a><br>Product:NrdC.1 conserved hypothetical protein            |
| PI: <a href="#"><u>QXN75790.1</u></a><br>Product:hypothetical protein                            | PI: <a href="#"><u>NP_049700.1</u></a><br>Product:NrdC.2 conserved hypothetical protein            |
| PI: <a href="#"><u>QXN75791.1</u></a><br>Product:hypothetical protein                            | PI: <a href="#"><u>NP_049701.1</u></a><br>Product:NrdC.3 conserved hypothetical protein            |
| PI: <a href="#"><u>QXN75792.1</u></a><br>Product:thioredoxin                                     | PI: <a href="#"><u>NP_049702.1</u></a><br>Product:NrdC.4 conserved hypothetical protein            |
| PI: <a href="#"><u>QXN75793.1</u></a><br>Product:thioredoxin                                     | PI: <a href="#"><u>NP_049703.1</u></a><br>Product:NrdC.5 conserved hypothetical protein            |

|                                                                                |                                                                                                   |
|--------------------------------------------------------------------------------|---------------------------------------------------------------------------------------------------|
| PI: <a href="#"><u>QXN75794.1</u></a><br>Product:thioredoxin                   | PI: <a href="#"><u>NP_049704.1</u></a><br>Product:NrdC.6 conserved hypothetical protein           |
| PI: <a href="#"><u>QXN75795.1</u></a><br>Product:thioredoxin                   | PI: <a href="#"><u>NP_049705.1</u></a><br>Product:NrdC.7 conserved hypothetical                   |
| PI: <a href="#"><u>QXN75796.1</u></a><br>Product:thioredoxin                   | PI: <a href="#"><u>NP_049706.1</u></a><br>Product:NrdC.8 conserved hypothetical protein           |
| PI: <a href="#"><u>QXN75797.1</u></a><br>Product:hypothetical protein          | PI: <a href="#"><u>NP_049707.1</u></a><br>Product:NrdC.9 conserved hypothetical protein           |
| PI: <a href="#"><u>QXN75799.1</u></a><br>Product:AAA domain-containing protein | PI: <a href="#"><u>NP_049708.1</u></a><br>Product:NrdC.10 conserved hypothetical protein          |
| PI: <a href="#"><u>QXN75800.1</u></a><br>Product:hypothetical protein          | PI: <a href="#"><u>NP_049709.1</u></a><br>Product:nucleotidyltransferase domain-containing        |
| PI: <a href="#"><u>QXN75803.1</u></a><br>Product:hypothetical protein          | PI: <a href="#"><u>NP_049711.1</u></a><br>Product:MobD.1 conserved hypothetical protein           |
| PI: <a href="#"><u>QXN75804.1</u></a><br>Product:hypothetical protein          | PI: <a href="#"><u>NP_049712.1</u></a><br>Product:MobD.2 conserved hypothetical protein           |
| PI: <a href="#"><u>QXN75805.1</u></a><br>Product:hypothetical protein          | PI: <a href="#"><u>NP_813809.1</u></a><br>Product:MobD.2a hypothetical protein                    |
| PI: <a href="#"><u>QXN75806.1</u></a><br>Product:hypothetical protein          | PI: <a href="#"><u>NP_049713.1</u></a><br>Product:MobD.3 hypothetical protein                     |
| PI: <a href="#"><u>QXN75807.1</u></a><br>Product:hypothetical protein          | PI: <a href="#"><u>NP_049714.1</u></a><br>Product:molybdopterin-guanine dinucleotide biosynthesis |
| PI: <a href="#"><u>QXN75808.1</u></a><br>Product:hypothetical protein          | PI: <a href="#"><u>NP_049715.1</u></a><br>Product:MobD.5 hypothetical protein                     |
| PI: <a href="#"><u>QXN75809.1</u></a><br>Product:hypothetical protein          | PI: <a href="#"><u>NP_049716.1</u></a><br>Product:DUF5856 family protein                          |
| PI: <a href="#"><u>QXN75810.1</u></a><br>Product:antiholin                     | PI: <a href="#"><u>NP_049717.1</u></a><br>Product:rI lysis inhibition regulator                   |
| PI: <a href="#"><u>QXN75811.1</u></a><br>Product:hypothetical protein          | PI: <a href="#"><u>NP_049718.1</u></a><br>Product:rI.1 conserved hypothetical protein             |
| PI: <a href="#"><u>QXN75812.1</u></a><br>Product:thymidine kinase              | PI: <a href="#"><u>NP_049719.1</u></a><br>Product:thymidine kinase                                |
| PI: <a href="#"><u>QXN75813.1</u></a><br>Product:hypothetical protein          | PI: <a href="#"><u>NP_049720.1</u></a><br>Product:Tk.1 conserved hypothetical protein             |
| PI: <a href="#"><u>QXN75814.1</u></a><br>Product:hypothetical protein          | PI: <a href="#"><u>NP_049721.1</u></a><br>Product:Tk.2 conserved hypothetical protein             |
| PI: <a href="#"><u>QXN75815.1</u></a><br>Product:hypothetical protein          | PI: <a href="#"><u>NP_049722.1</u></a><br>Product:Tk.2 conserved hypothetical protein             |
| PI: <a href="#"><u>QXN75816.1</u></a><br>Product:hypothetical protein          | PI: <a href="#"><u>NP_049723.1</u></a><br>Product:macro domain-containing protein                 |
| PI: <a href="#"><u>QXN75817.1</u></a><br>Product:valyl--tRNA ligase modifier   | PI: <a href="#"><u>NP_049724.1</u></a><br>Product:Vs valyl-tRNA synthetase modifier               |
| PI: <a href="#"><u>QXN75818.1</u></a><br>Product:SLT domain-containing protein | PI: <a href="#"><u>NP_049725.1</u></a><br>Product:transglycosylase SLT domain-containing protein  |
| PI: <a href="#"><u>QXN75819.1</u></a><br>Product:endoribonuclease              | PI: <a href="#"><u>NP_049726.1</u></a><br>Product:site-specific RNA endonuclease                  |

|                                                                                          |                                                                                                    |
|------------------------------------------------------------------------------------------|----------------------------------------------------------------------------------------------------|
| PI: <a href="#"><u>QXN75820.1</u></a><br>Product:hypothetical protein                    | PI: <a href="#"><u>NP_049727.1</u></a><br>Product:Vs.3 conserved hypothetical protein              |
| PI: <a href="#"><u>QXN75821.1</u></a><br>Product:hypothetical protein                    | PI: <a href="#"><u>NP_049728.1</u></a><br>Product:Vs.4 conserved hypothetical protein              |
| PI: <a href="#"><u>QXN75823.1</u></a><br>Product:pyruvate formate-lyase                  | PI: <a href="#"><u>NP_049730.1</u></a><br>Product:autonomous glycyl radical cofactor GrcA          |
| PI: <a href="#"><u>QXN75824.1</u></a><br>Product:hypothetical protein                    | PI: <a href="#"><u>NP_049731.1</u></a><br>Product:Vs.7 conserved hypothetical protein              |
| PI: <a href="#"><u>QXN75825.1</u></a><br>Product:hypothetical protein                    | PI: <a href="#"><u>NP_049732.1</u></a><br>Product:Vs.8 conserved hypothetical protein              |
| PI: <a href="#"><u>QXN75826.1</u></a><br>Product:hypothetical protein                    | PI: <a href="#"><u>NP_049734.1</u></a><br>Product:IpII internal head protein                       |
| PI: <a href="#"><u>QXN75827.1</u></a><br>Product:hypothetical protein                    | PI: <a href="#"><u>NP_049735.1</u></a><br>Product:IpIII internal head protein                      |
| PI: <a href="#"><u>QXN75830.1</u></a><br>Product:baseplate hub subunit and tail lysozyme | PI: <a href="#"><u>NP_049736.1</u></a><br>Product:glycoside hydrolase family protein               |
| PI: <a href="#"><u>QXN75831.1</u></a><br>Product:nudix hydrolase                         | PI: <a href="#"><u>NP_049737.1</u></a><br>Product:NUDIX hydrolase                                  |
| PI: <a href="#"><u>QXN75832.1</u></a><br>Product:hypothetical protein                    | PI: <a href="#"><u>NP_049738.1</u></a><br>Product:e.2 conserved hypothetical                       |
| PI: <a href="#"><u>QXN75833.1</u></a><br>Product:hypothetical protein                    | PI: <a href="#"><u>NP_049739.1</u></a><br>Product:sulfurtransferase                                |
| PI: <a href="#"><u>QXN75834.1</u></a><br>Product:hypothetical protein                    | PI: <a href="#"><u>NP_049740.1</u></a><br>Product:sulfurtransferase                                |
| PI: <a href="#"><u>QXN75835.1</u></a><br>Product:hypothetical protein                    | PI: <a href="#"><u>NP_049741.1</u></a><br>Product:e.5 conserved hypothetical protein               |
| PI: <a href="#"><u>QXN75836.1</u></a><br>Product:hypothetical protein                    | PI: <a href="#"><u>NP_049742.1</u></a><br>Product:e.6 conserved hypothetical protein               |
| PI: <a href="#"><u>QXN75837.1</u></a><br>Product:hypothetical protein                    | PI: <a href="#"><u>NP_049743.1</u></a><br>Product:e.7 hypothetical protein                         |
| PI: <a href="#"><u>QXN75838.1</u></a><br>Product:hypothetical protein                    | PI: <a href="#"><u>NP_049744.1</u></a><br>Product:e.8 conserved hypothetical protein               |
| PI: <a href="#"><u>QXN75839.1</u></a><br>Product:group I intron endonuclease             | PI: <a href="#"><u>NP_049745.2</u></a><br>Product:GIY-YIG nuclease family protein                  |
| PI: <a href="#"><u>QXN75840.1</u></a><br>Product:hypothetical protein                    | PI: <a href="#"><u>NP_049746.1</u></a><br>Product:Trna.2 conserved hypothetical protein            |
| PI: <a href="#"><u>QXN75841.1</u></a><br>Product:hypothetical protein                    | PI: <a href="#"><u>NP_049747.1</u></a><br>Product:Trna.3 conserved hypothetical protein            |
| PI: <a href="#"><u>QXN75842.1</u></a><br>Product:hypothetical protein                    | PI: <a href="#"><u>NP_049748.1</u></a><br>Product:Trna.4 conserved hypothetical predicted membrane |
| PI: <a href="#"><u>QXN75845.1</u></a><br>Product:hypothetical protein                    | PI: <a href="#"><u>NP_049750.1</u></a><br>Product:hypothetical protein                             |
| PI: <a href="#"><u>QXN75846.1</u></a><br>Product:tail fiber assembly protein             | PI: <a href="#"><u>NP_049751.1</u></a><br>Product:gp57A chaperone for tail fiber formation         |
| PI: <a href="#"><u>QXN75847.1</u></a><br>Product:deoxynucleotide monophosphate kinase    | PI: <a href="#"><u>NP_049752.1</u></a><br>Product:deoxynucleoside monophosphate kinase             |



|                                                                                                |                                                                                                 |
|------------------------------------------------------------------------------------------------|-------------------------------------------------------------------------------------------------|
| PI: <a href="#"><u>QXN75848.1</u></a><br>Product:tail completion and sheath stabilizer protein | PI: <a href="#"><u>NP_049753.1</u></a><br>Product:tail protein                                  |
| PI: <a href="#"><u>QXN75849.1</u></a><br>Product:DNA end protector protein                     | PI: <a href="#"><u>NP_049754.1</u></a><br>Product:DNA end protector protein                     |
| PI: <a href="#"><u>QXN75850.1</u></a><br>Product:head completion protein                       | PI: <a href="#"><u>NP_049755.1</u></a><br>Product:head completion protein                       |
| PI: <a href="#"><u>QXN75851.1</u></a><br>Product:baseplate wedge protein                       | PI: <a href="#"><u>NP_049756.1</u></a><br>Product:baseplate wedge protein 53                    |
| PI: <a href="#"><u>QXN75852.1</u></a><br>Product:baseplate hub subunit and tail lysozyme       | PI: <a href="#"><u>NP_049757.1</u></a><br>Product:glycoside hydrolase family protein            |
| PI: <a href="#"><u>QXN75853.1</u></a><br>Product:hypothetical protein                          | PI: <a href="#"><u>NP_049760.1</u></a><br>Product:hypothetical protein                          |
| PI: <a href="#"><u>QXN75854.1</u></a><br>Product:hypothetical protein                          | PI: <a href="#"><u>NP_049763.1</u></a><br>Product:PAAR domain-containing protein                |
| PI: <a href="#"><u>QXN75855.1</u></a><br>Product:baseplate wedge protein                       | PI: <a href="#"><u>NP_049764.1</u></a><br>Product:baseplate wedge subunit                       |
| PI: <a href="#"><u>QXN75856.1</u></a><br>Product:baseplate wedge protein                       | PI: <a href="#"><u>NP_049765.1</u></a><br>Product:baseplate wedge subunit                       |
| PI: <a href="#"><u>QXN75857.1</u></a><br>Product:baseplate wedge protein                       | PI: <a href="#"><u>NP_049766.1</u></a><br>Product:baseplate wedge subunit                       |
| PI: <a href="#"><u>QXN75858.1</u></a><br>Product:baseplate wedge tail-fiber connector          | PI: <a href="#"><u>NP_049767.1</u></a><br>Product:baseplate wedge tail fiber connector          |
| PI: <a href="#"><u>QXN75859.1</u></a><br>Product:baseplate wedge protein                       | PI: <a href="#"><u>NP_049768.1</u></a><br>Product:tail protein                                  |
| PI: <a href="#"><u>QXN75860.1</u></a><br>Product:baseplate wedge completion tail pin           | PI: <a href="#"><u>NP_049769.1</u></a><br>Product:tail protein                                  |
| PI: <a href="#"><u>QXN75861.1</u></a><br>Product:short tail fiber protein                      | PI: <a href="#"><u>NP_049770.1</u></a><br>Product:tail fiber protein                            |
| PI: <a href="#"><u>QXN75862.1</u></a><br>Product:fibrin neck whiskers protein                  | PI: <a href="#"><u>NP_049771.1</u></a><br>Product:neck protein fibrin                           |
| PI: <a href="#"><u>QXN75863.1</u></a><br>Product:neck protein                                  | PI: <a href="#"><u>NP_049772.1</u></a><br>Product:putative neck protein                         |
| PI: <a href="#"><u>QXN75864.1</u></a><br>Product:neck protein                                  | PI: <a href="#"><u>NP_049773.1</u></a><br>Product:neck protein                                  |
| PI: <a href="#"><u>QXN75865.1</u></a><br>Product:tail sheath stabilization protein             | PI: <a href="#"><u>NP_049774.1</u></a><br>Product:tail sheath stabilizer and completion protein |
| PI: <a href="#"><u>QXN75866.1</u></a><br>Product:terminase                                     | PI: <a href="#"><u>NP_049775.1</u></a><br>Product:small terminase protein                       |
| PI: <a href="#"><u>QXN75867.1</u></a><br>Product:terminase                                     | PI: <a href="#"><u>NP_049776.1</u></a><br>Product:terminase family protein                      |
| PI: <a href="#"><u>QXN75867.1</u></a><br>Product:terminase                                     | PI: <a href="#"><u>NP_049778.1</u></a><br>Product:large terminase protein                       |
| PI: <a href="#"><u>QXN75867.1</u></a><br>Product:terminase                                     | PI: <a href="#"><u>NP_049779.1</u></a><br>Product:large terminase protein                       |
| PI: <a href="#"><u>QXN75867.1</u></a><br>Product:terminase                                     | PI: <a href="#"><u>NP_049777.1</u></a><br>Product:large terminase protein                       |



|                                                                                             |                                                                                                 |
|---------------------------------------------------------------------------------------------|-------------------------------------------------------------------------------------------------|
| PI: <a href="#"><u>QXN75868.1</u></a><br>Product:tail sheath protein                        | PI: <a href="#"><u>NP_049780.1</u></a><br>Product:tail sheath subtilisin-like domain-containing |
| PI: <a href="#"><u>QXN75869.1</u></a><br>Product:tail fiber protein                         | PI: <a href="#"><u>NP_049781.1</u></a><br>Product:tail protein                                  |
| PI: <a href="#"><u>QXN75870.1</u></a><br>Product:portal protein                             | PI: <a href="#"><u>NP_049782.1</u></a><br>Product:portal protein                                |
| PI: <a href="#"><u>QXN75871.1</u></a><br>Product:prohead core protein                       | PI: <a href="#"><u>NP_049783.1</u></a><br>Product:prohead core protein                          |
| PI: <a href="#"><u>QXN75872.1</u></a><br>Product:prohead core protein                       | PI: <a href="#"><u>NP_049784.1</u></a><br>Product:prohead core protein                          |
| PI: <a href="#"><u>QXN75873.1</u></a><br>Product:prohead core scaffold protein and protease | PI: <a href="#"><u>NP_049785.1</u></a><br>Product:prohead core scaffolding protein and protease |
| PI: <a href="#"><u>QXN75874.1</u></a><br>Product:prohead core protein                       | PI: <a href="#"><u>NP_049786.1</u></a><br>Product:prohead core protein                          |
| PI: <a href="#"><u>QXN75875.1</u></a><br>Product:major capsid protein                       | PI: <a href="#"><u>NP_049787.1</u></a><br>Product:capsid protein                                |
| PI: <a href="#"><u>QXN75876.1</u></a><br>Product:capsid vertex protein                      | PI: <a href="#"><u>NP_049789.1</u></a><br>Product:capsid vertex protein                         |
| PI: <a href="#"><u>QXN75877.1</u></a><br>Product:RNA ligase                                 | PI: <a href="#"><u>NP_049790.1</u></a><br>Product:RNA ligase                                    |
| PI: <a href="#"><u>QXN75878.1</u></a><br>Product:hypothetical protein                       | PI: <a href="#"><u>NP_049791.1</u></a><br>Product:gp24.2 conserved hypothetical protein         |
| PI: <a href="#"><u>QXN75879.1</u></a><br>Product:hypothetical protein                       | PI: <a href="#"><u>NP_049792.1</u></a><br>Product:gp24.3 conserved hypothetical protein         |
| PI: <a href="#"><u>QXN75880.1</u></a><br>Product:highly immunogenic outer capsid protein    | PI: <a href="#"><u>NP_049793.1</u></a><br>Product:PKD domain-containing protein                 |
| PI: <a href="#"><u>QXN75881.1</u></a><br>Product:minor capsid protein                       | PI: <a href="#"><u>NP_049794.1</u></a><br>Product:Inh inhibitor of prohead protease gp21        |
| PI: <a href="#"><u>QXN75882.1</u></a><br>Product:RNA-DNA + DNA-DNA helicase                 | PI: <a href="#"><u>NP_049796.1</u></a><br>Product:UvsW helicase                                 |
| PI: <a href="#"><u>QXN75883.1</u></a><br>Product:homing endonuclease                        | PI: <a href="#"><u>NP_049844.1</u></a><br>Product:MobE homing endonuclease                      |
| PI: <a href="#"><u>QXN75885.1</u></a><br>Product:hypothetical protein                       | PI: <a href="#"><u>NP_049797.1</u></a><br>Product:DUF2685 domain-containing protein             |
| PI: <a href="#"><u>QXN75886.1</u></a><br>Product:hypothetical protein                       | PI: <a href="#"><u>NP_049798.1</u></a><br>Product:UvsY.-1 conserved hypothetical protein        |
| PI: <a href="#"><u>QXN75887.1</u></a><br>Product:ssDNA-binding protein                      | PI: <a href="#"><u>NP_049799.2</u></a><br>Product:recombination mediator protein UvsY           |
| PI: <a href="#"><u>QXN75888.1</u></a><br>Product:baseplate wedge subunit                    | PI: <a href="#"><u>NP_049800.1</u></a><br>Product:GPW/gp25 family protein                       |
| PI: <a href="#"><u>QXN75889.1</u></a><br>Product:baseplate hub subunit                      | PI: <a href="#"><u>NP_049801.1</u></a><br>Product:gp26 baseplate hub subunit                    |
| PI: <a href="#"><u>QXN75890.1</u></a><br>Product:baseplate hub assembly protein             | PI: <a href="#"><u>NP_049802.1</u></a><br>Product:baseplate hub assembly protein                |
| PI: <a href="#"><u>QXN75891.1</u></a><br>Product:baseplate hub subunit                      | PI: <a href="#"><u>NP_049803.1</u></a><br>Product:base plate hub subunit                        |
| PI: <a href="#"><u>QXN75892.1</u></a><br>Product:baseplate hub distal subunit               | PI: <a href="#"><u>NP_049804.2</u></a><br>Product:base plate distal hub subunit                 |

|                                                                                                |                                                                                           |
|------------------------------------------------------------------------------------------------|-------------------------------------------------------------------------------------------|
| PI: <a href="#"><u>QXN75893.1</u></a><br>Product:baseplate hub subunit tail length determinant | PI: <a href="#"><u>NP_049805.1</u></a><br>Product:gp29 baseplate hub subunit              |
| PI: <a href="#"><u>QXN75894.1</u></a><br>Product:tail-tube assembly protein                    | PI: <a href="#"><u>NP_049806.1</u></a><br>Product:baseplate tail-tube junction protein    |
| PI: <a href="#"><u>QXN75895.1</u></a><br>Product:baseplate tail-tube initiator                 | PI: <a href="#"><u>NP_049807.1</u></a><br>Product:baseplate subunit                       |
| PI: <a href="#"><u>QXN75896.1</u></a><br>Product:hypothetical protein                          | PI: <a href="#"><u>NP_049808.1</u></a><br>Product:Alt.-3 conserved hypothetical protein   |
| PI: <a href="#"><u>QXN75898.1</u></a><br>Product:NAD(+)--arginine ADP-ribosyltransferase       | PI: <a href="#"><u>NP_049811.1</u></a><br>Product:RNA polymerase ADP-ribosylase           |
| PI: <a href="#"><u>QXN75899.1</u></a><br>Product:hypothetical protein                          | PI: <a href="#"><u>NP_049812.1</u></a><br>Product:Alt.1 conserved hypothetical protein    |
| PI: <a href="#"><u>QXN75900.1</u></a><br>Product:DNA ligase                                    | PI: <a href="#"><u>NP_049813.1</u></a><br>Product:DNA ligase                              |
| PI: <a href="#"><u>QXN75901.1</u></a><br>Product:hypothetical protein                          | PI: <a href="#"><u>NP_049814.1</u></a><br>Product:DUF3045 domain-containing protein       |
| PI: <a href="#"><u>QXN75902.1</u></a><br>Product:hypothetical protein                          | PI: <a href="#"><u>NP_049815.1</u></a><br>Product:hypothetical protein                    |
| PI: <a href="#"><u>QXN75903.1</u></a><br>Product:hypothetical protein                          | PI: <a href="#"><u>NP_049816.1</u></a><br>Product:hypothetical protein                    |
| PI: <a href="#"><u>QXN75904.1</u></a><br>Product:hypothetical protein                          | PI: <a href="#"><u>NP_049818.1</u></a><br>Product:gp30.4 conserved hypothetical protein   |
| PI: <a href="#"><u>QXN75905.1</u></a><br>Product:hypothetical protein                          | PI: <a href="#"><u>NP_049819.1</u></a><br>Product:gp30.5 hypothetical protein             |
| PI: <a href="#"><u>QXN75906.1</u></a><br>Product:hypothetical protein                          | PI: <a href="#"><u>NP_049820.1</u></a><br>Product:gp30.6 conserved hypothetical protein   |
| PI: <a href="#"><u>QXN75907.1</u></a><br>Product:hypothetical protein                          | PI: <a href="#"><u>NP_049821.1</u></a><br>Product:gp30.7 conserved hypothetical protein   |
| PI: <a href="#"><u>QXN75908.1</u></a><br>Product:hypothetical protein                          | PI: <a href="#"><u>NP_049822.1</u></a><br>Product:gp30.8 conserved hypothetical protein   |
| PI: <a href="#"><u>QXN75909.1</u></a><br>Product:hypothetical protein                          | PI: <a href="#"><u>NP_049823.1</u></a><br>Product:gp30.9 conserved hypothetical protein   |
| PI: <a href="#"><u>QXN75910.1</u></a><br>Product:lysis inhibition accessory protein            | PI: <a href="#"><u>NP_049824.1</u></a><br>Product:rIII lysis inhibition accessory protein |
| PI: <a href="#"><u>QXN75911.1</u></a><br>Product:head assembly co-chaperone                    | PI: <a href="#"><u>NP_049825.1</u></a><br>Product:co-chaperone GroES family protein       |
| PI: <a href="#"><u>QXN75912.1</u></a><br>Product:hypothetical protein                          | PI: <a href="#"><u>NP_049826.1</u></a><br>Product:SH3 beta-barrel fold-containing protein |
| PI: <a href="#"><u>QXN75913.1</u></a><br>Product:hypothetical protein                          | PI: <a href="#"><u>NP_049827.1</u></a><br>Product:gp31.2 hypothetical protein             |
| PI: <a href="#"><u>QXN75914.1</u></a><br>Product:deoxycytidylate deaminase                     | PI: <a href="#"><u>NP_049828.1</u></a><br>Product:dCMP deaminase                          |
| PI: <a href="#"><u>QXN75915.1</u></a><br>Product:hypothetical protein                          | PI: <a href="#"><u>NP_049829.1</u></a><br>Product:Cd.1 hypothetical protein               |
| PI: <a href="#"><u>QXN75916.1</u></a><br>Product:hypothetical protein                          | PI: <a href="#"><u>NP_049830.1</u></a><br>Product:Cd.2 conserved hypothetical protein     |

|                                                                                             |                                                                                                    |
|---------------------------------------------------------------------------------------------|----------------------------------------------------------------------------------------------------|
| PI: <a href="#"><u>QXN75917.1</u></a><br>Product:hypothetical protein                       | PI: <a href="#"><u>NP_049831.1</u></a><br>Product:Cd.3 conserved hypothetical protein              |
| PI: <a href="#"><u>QXN75918.1</u></a><br>Product:hypothetical protein                       | PI: <a href="#"><u>NP_049832.1</u></a><br>Product:Cd.4 conserved hypothetical protein              |
| PI: <a href="#"><u>QXN75919.1</u></a><br>Product:hypothetical protein                       | PI: <a href="#"><u>NP_049833.1</u></a><br>Product:Cd.5 hypothetical protein                        |
| PI: <a href="#"><u>QXN75920.1</u></a><br>Product:polynucleotide kinase                      | PI: <a href="#"><u>NP_049834.1</u></a><br>Product:AAA family ATPase                                |
| PI: <a href="#"><u>QXN75922.1</u></a><br>Product:hypothetical protein                       | PI: <a href="#"><u>NP_049835.1</u></a><br>Product:PseT.1 conserved hypothetical protein            |
| PI: <a href="#"><u>QXN75923.1</u></a><br>Product:hypothetical protein                       | PI: <a href="#"><u>NP_049836.2</u></a><br>Product:PseT.2 conserved hypothetical protein            |
| PI: <a href="#"><u>QXN75924.1</u></a><br>Product:hypothetical protein                       | PI: <a href="#"><u>NP_049837.1</u></a><br>Product:PseT.3 conserved hypothetical predicted membrane |
| PI: <a href="#"><u>QXN75925.1</u></a><br>Product:inhibitor of host transcription            | PI: <a href="#"><u>NP_049838.1</u></a><br>Product:Alc inhibitor of host transcription              |
| PI: <a href="#"><u>QXN75926.1</u></a><br>Product:RNA ligase                                 | PI: <a href="#"><u>NP_049839.1</u></a><br>Product:T4 RnIA family RNA ligase                        |
| PI: <a href="#"><u>QXN75927.1</u></a><br>Product:endonuclease                               | PI: <a href="#"><u>NP_049840.1</u></a><br>Product:GIY-YIG nuclease family protein                  |
| PI: <a href="#"><u>QXN75928.1</u></a><br>Product:ribonucleoside-diphosphate reductase       | PI: <a href="#"><u>NP_049841.1</u></a><br>Product:ribonucleotide-diphosphate reductase subunit     |
| PI: <a href="#"><u>QXN75929.1</u></a><br>Product:ribonucleoside-diphosphate reductase       | PI: <a href="#"><u>NP_049845.1</u></a><br>Product:ribonucleoside-diphosphate reductase subunit     |
| PI: <a href="#"><u>QXN75930.1</u></a><br>Product:hypothetical protein                       | PI: <a href="#"><u>NP_049846.1</u></a><br>Product:DUF4326 domain-containing protein                |
| PI: <a href="#"><u>QXN75931.1</u></a><br>Product:hypothetical protein                       | PI: <a href="#"><u>NP_049847.1</u></a><br>Product:NrdA.2 conserved hypothetical protein            |
| PI: <a href="#"><u>QXN75932.1</u></a><br>Product:thymidylate synthase                       | PI: <a href="#"><u>NP_049848.1</u></a><br>Product:thymidylate synthase                             |
| PI: <a href="#"><u>QXN75934.1</u></a><br>Product:dihydrofolate reductase                    | PI: <a href="#"><u>NP_049850.1</u></a><br>Product:dihydrofolate reductase                          |
| PI: <a href="#"><u>QXN75937.1</u></a><br>Product:hypothetical protein                       | PI: <a href="#"><u>NP_049851.1</u></a><br>Product:DUF5417 domain-containing protein                |
| PI: <a href="#"><u>QXN75938.1</u></a><br>Product:hypothetical protein                       | PI: <a href="#"><u>NP_049852.1</u></a><br>Product:Frd.2 conserved hypothetical protein             |
| PI: <a href="#"><u>QXN75939.1</u></a><br>Product:hypothetical protein                       | PI: <a href="#"><u>NP_049853.1</u></a><br>Product:Frd.3 hypothetical protein                       |
| PI: <a href="#"><u>QXN75940.1</u></a><br>Product:helix-destabilizing protein                | PI: <a href="#"><u>NP_049854.1</u></a><br>Product:single-stranded DNA-binding protein              |
| PI: <a href="#"><u>QXN75941.1</u></a><br>Product:loader of DNA helicase and single-stranded | PI: <a href="#"><u>NP_049856.1</u></a><br>Product:59 protein                                       |
| PI: <a href="#"><u>QXN75942.1</u></a><br>Product:hypothetical protein                       | PI: <a href="#"><u>NP_049857.1</u></a><br>Product:late promoter transcription accessory protein    |
| PI: <a href="#"><u>QXN75943.1</u></a><br>Product:double-stranded DNA-binding protein        | PI: <a href="#"><u>NP_049858.1</u></a><br>Product:double-stranded DNA binding protein              |

|                                                                                          |                                                                                                   |
|------------------------------------------------------------------------------------------|---------------------------------------------------------------------------------------------------|
| PI: <a href="#"><u>QXN75944.1</u></a><br>Product:ribonuclease H                          | PI: <a href="#"><u>NP_049859.1</u></a><br>Product:RnaseH                                          |
| PI: <a href="#"><u>QXN75945.1</u></a><br>Product:long-tail fiber proximal subunit        | PI: <a href="#"><u>NP_049860.1</u></a><br>Product:tail protein                                    |
| PI: <a href="#"><u>QXN75946.1</u></a><br>Product:long-tail fiber connector               | PI: <a href="#"><u>NP_049861.1</u></a><br>Product:gp35 hinge connector of long tail fiber         |
| PI: <a href="#"><u>QXN75947.1</u></a><br>Product:long-tail fiber protein                 | PI: <a href="#"><u>NP_049862.1</u></a><br>Product:tail fiber protein                              |
| PI: <a href="#"><u>QXN75948.1</u></a><br>Product:long-tail fiber protein                 | PI: <a href="#"><u>NP_049863.1</u></a><br>Product:gp37 long tail fiber                            |
| PI: <a href="#"><u>QXN75950.1</u></a><br>Product:holin                                   | PI: <a href="#"><u>NP_049865.1</u></a><br>Product:t holin lysis mediator                          |
| PI: <a href="#"><u>QXN75951.1</u></a><br>Product:anti-sigma factor                       | PI: <a href="#"><u>NP_049866.1</u></a><br>Product:AsiA anti-sigma 70 protein                      |
| PI: <a href="#"><u>QXN75952.1</u></a><br>Product:anti-sigma factor                       | PI: <a href="#"><u>NP_049867.1</u></a><br>Product:AsiA.1 hypothetical protein                     |
| PI: <a href="#"><u>QXN75953.1</u></a><br>Product:baseplate wedge tail fiber connector    | PI: <a href="#"><u>NP_049868.1</u></a><br>Product:Arn inhibitor of MrcBC restriction endonuclease |
| PI: <a href="#"><u>QXN75955.1</u></a><br>Product:anti-restriction nuclease               | PI: <a href="#"><u>NP_049870.1</u></a><br>Product:Arn.2 conserved hypothetical protein            |
| PI: <a href="#"><u>QXN75956.1</u></a><br>Product:anti-restriction nuclease               | PI: <a href="#"><u>NP_049871.1</u></a><br>Product:Arn.3 conserved hypothetical protein            |
| PI: <a href="#"><u>QXN75957.1</u></a><br>Product:hypothetical protein                    | PI: <a href="#"><u>NP_049872.2</u></a><br>Product:Arn.4 conserved hypothetical protein            |
| PI: <a href="#"><u>QXN75958.1</u></a><br>Product:middle transcription regulatory protein | PI: <a href="#"><u>NP_049873.1</u></a><br>Product:flagellar motor protein MotA                    |
| PI: <a href="#"><u>QXN75959.1</u></a><br>Product:hypothetical protein                    | PI: <a href="#"><u>NP_049874.1</u></a><br>Product:MotA.1 hypothetical predicted periplasmic       |
| PI: <a href="#"><u>QXN75960.1</u></a><br>Product:DNA topoisomerase medium subunit        | PI: <a href="#"><u>NP_049875.1</u></a><br>Product:DNA topoisomerase II medium subunit             |
| PI: <a href="#"><u>QXN75961.1</u></a><br>Product:acridine resistance protein             | PI: <a href="#"><u>NP_049877.1</u></a><br>Product:Ac acridine resistance protein                  |
| PI: <a href="#"><u>QXN75962.1</u></a><br>Product:nucleoid disruption protein             | PI: <a href="#"><u>NP_049879.1</u></a><br>Product:naphthalene 1                                   |
| PI: <a href="#"><u>QXN75963.1</u></a><br>Product:hypothetical protein                    | PI: <a href="#"><u>NP_049880.1</u></a><br>Product:naphthalene 1                                   |
| PI: <a href="#"><u>QXN75964.1</u></a><br>Product:outer membrane protein                  | PI: <a href="#"><u>NP_049881.1</u></a><br>Product:Ndd.2 hypothetical predicted outer membrane     |
| PI: <a href="#"><u>QXN75965.1</u></a><br>Product:hypothetical protein                    | PI: <a href="#"><u>NP_049882.1</u></a><br>Product:Ndd.2a hypothetical predicted periplasmic       |
| PI: <a href="#"><u>QXN75966.1</u></a><br>Product:inner membrane protein                  | PI: <a href="#"><u>NP_049884.1</u></a><br>Product:Ndd.4 hypothetical predicted inner membrane     |
| PI: <a href="#"><u>QXN75967.1</u></a><br>Product:hypothetical protein                    | PI: <a href="#"><u>NP_049885.1</u></a><br>Product:Ndd.5 hypothetical predicted outer membrane     |
| PI: <a href="#"><u>QXN75969.1</u></a><br>Product:endonuclease IV                         | PI: <a href="#"><u>NP_049887.1</u></a><br>Product:DenB DNA endonuclease IV                        |

|                                                                                              |                                                                                              |
|----------------------------------------------------------------------------------------------|----------------------------------------------------------------------------------------------|
| PI: <a href="#"><u>QXN75970.1</u></a><br>Product:hypothetical protein                        | PI: <a href="#"><u>NP_049888.1</u></a><br>Product:DenB.1 hypothetical protein                |
| PI: <a href="#"><u>QXN75971.1</u></a><br>Product:lysis inhibitor rIIB                        | PI: <a href="#"><u>NP_049889.1</u></a><br>Product:helix-turn-helix domain-containing protein |
| PI: <a href="#"><u>QXN75972.1</u></a><br>Product:protector from prophage-induced early lysis | PI: <a href="#"><u>NP_049616.1</u></a><br>Product:rIIA protector from prophage-induced early |
| PI: <a href="#"><u>QXN75973.1</u></a><br>Product:hypothetical protein                        | PI: <a href="#"><u>NP_049617.1</u></a><br>Product:rIIA.1 hypothetical protein                |
| PI: <a href="#"><u>QXN75974.1</u></a><br>Product:DNA topoisomerase subunit                   | PI: <a href="#"><u>NP_049618.1</u></a><br>Product:gp60 topoisomerase II                      |
| PI: <a href="#"><u>QXN75976.1</u></a><br>Product:homing endonuclease                         | PI: <a href="#"><u>NP_049619.1</u></a><br>Product:gp60.1 hypothetical protein                |
| PI: <a href="#"><u>QXN75977.1</u></a><br>Product:DNA topoisomerase large subunit             | PI: <a href="#"><u>NP_049621.1</u></a><br>Product:DNA topoisomerase II large subunit         |
| PI: <a href="#"><u>QXN75978.1</u></a><br>Product:hypothetical protein                        | PI: <a href="#"><u>NP_049622.1</u></a><br>Product:gp39.1 hypothetical protein                |
| PI: <a href="#"><u>QXN75979.1</u></a><br>Product:hypothetical protein                        | PI: <a href="#"><u>NP_049623.1</u></a><br>Product:gp39.2 hypothetical protein                |
| PI: <a href="#"><u>QXN75980.1</u></a><br>Product:mRNA metabolism modulator                   | PI: <a href="#"><u>NP_049624.1</u></a><br>Product:goF mRNA metabolism modulator              |
| PI: <a href="#"><u>QXN75981.1</u></a><br>Product:modifier of suppressor tRNAs                | PI: <a href="#"><u>NP_049625.1</u></a><br>Product:cytochrome C biogenesis protein CcmE       |
| PI: <a href="#"><u>QXN75982.1</u></a><br>Product:transcriptional regulator                   | PI: <a href="#"><u>NP_049626.1</u></a><br>Product:MotB modifier of transcription             |
| PI: <a href="#"><u>QXN75984.1</u></a><br>Product:hypothetical protein                        | PI: <a href="#"><u>NP_049628.1</u></a><br>Product:MotB.2 hypothetical protein                |

| <b>Escherichia phage BF17</b><br><b><u>MW822008.1</u></b>             | <b>Escherichia phage PBE04</b><br><b><u>KC295538.1</u></b>            |
|-----------------------------------------------------------------------|-----------------------------------------------------------------------|
| PI: <a href="#"><u>QXN75985.1</u></a><br>Product:hypothetical protein | PI: <a href="#"><u>AGC34959.1</u></a><br>Product:hypothetical protein |
| PI: <a href="#"><u>QXN75986.1</u></a><br>Product:hypothetical protein | PI: <a href="#"><u>AGC34958.1</u></a><br>Product:hypothetical protein |
| PI: <a href="#"><u>QXN75987.1</u></a><br>Product:hypothetical protein | PI: <a href="#"><u>AGC34957.1</u></a><br>Product:hypothetical protein |
| PI: <a href="#"><u>QXN75988.1</u></a><br>Product:hypothetical protein | PI: <a href="#"><u>AGC34956.1</u></a><br>Product:hypothetical protein |
| PI: <a href="#"><u>QXN75989.1</u></a><br>Product:hypothetical protein | PI: <a href="#"><u>AGC34955.1</u></a><br>Product:hypothetical protein |
| PI: <a href="#"><u>QXN75990.1</u></a><br>Product:hypothetical protein | PI: <a href="#"><u>AGC34954.1</u></a><br>Product:hypothetical protein |
| PI: <a href="#"><u>QXN75991.1</u></a><br>Product:hypothetical protein | PI: <a href="#"><u>AGC34953.1</u></a><br>Product:hypothetical protein |
| PI: <a href="#"><u>QXN75992.1</u></a><br>Product:hypothetical protein | PI: <a href="#"><u>AGC34952.1</u></a><br>Product:hypothetical protein |
| PI: <a href="#"><u>QXN75993.1</u></a><br>Product:hypothetical protein | PI: <a href="#"><u>AGC34949.1</u></a><br>Product:hypothetical protein |

|                                                                       |                                                                       |
|-----------------------------------------------------------------------|-----------------------------------------------------------------------|
| PI: <a href="#"><u>QXN75995.1</u></a><br>Product:hypothetical protein | PI: <a href="#"><u>AGC34948.1</u></a><br>Product:hypothetical protein |
| PI: <a href="#"><u>QXN75997.1</u></a><br>Product:hypothetical protein | PI: <a href="#"><u>AGC34947.1</u></a><br>Product:hypothetical protein |
| PI: <a href="#"><u>QXN75998.1</u></a><br>Product:hypothetical protein | PI: <a href="#"><u>AGC34946.1</u></a><br>Product:hypothetical protein |
| PI: <a href="#"><u>QXN76000.1</u></a><br>Product:hypothetical protein | PI: <a href="#"><u>AGC34945.1</u></a><br>Product:hypothetical protein |
| PI: <a href="#"><u>QXN76001.1</u></a><br>Product:hypothetical protein | PI: <a href="#"><u>AGC34944.1</u></a><br>Product:hypothetical protein |
| PI: <a href="#"><u>QXN76002.1</u></a><br>Product:hypothetical protein | PI: <a href="#"><u>AGC34943.1</u></a><br>Product:hypothetical protein |
| PI: <a href="#"><u>QXN76003.1</u></a><br>Product:hypothetical protein | PI: <a href="#"><u>AGC34942.1</u></a><br>Product:hypothetical protein |
| PI: <a href="#"><u>QXN76004.1</u></a><br>Product:hypothetical protein | PI: <a href="#"><u>AGC34941.1</u></a><br>Product:hypothetical protein |
| PI: <a href="#"><u>QXN76006.1</u></a><br>Product:hypothetical protein | PI: <a href="#"><u>AGC34939.1</u></a><br>Product:hypothetical protein |
| PI: <a href="#"><u>QXN76007.1</u></a><br>Product:hypothetical protein | PI: <a href="#"><u>AGC34938.1</u></a><br>Product:hypothetical protein |
| PI: <a href="#"><u>QXN76008.1</u></a><br>Product:hypothetical protein | PI: <a href="#"><u>AGC34937.1</u></a><br>Product:hypothetical protein |
| PI: <a href="#"><u>QXN76010.1</u></a><br>Product:hypothetical protein | PI: <a href="#"><u>AGC34936.1</u></a><br>Product:hypothetical protein |
| PI: <a href="#"><u>QXN76011.1</u></a><br>Product:hypothetical protein | PI: <a href="#"><u>AGC34935.1</u></a><br>Product:hypothetical protein |
| PI: <a href="#"><u>QXN76012.1</u></a><br>Product:hypothetical protein | PI: <a href="#"><u>AGC34934.1</u></a><br>Product:hypothetical protein |
| PI: <a href="#"><u>QXN76015.1</u></a><br>Product:hypothetical protein | PI: <a href="#"><u>AGC34931.1</u></a><br>Product:hypothetical protein |
| PI: <a href="#"><u>QXN76016.1</u></a><br>Product:hypothetical protein | PI: <a href="#"><u>AGC34930.1</u></a><br>Product:hypothetical protein |
| PI: <a href="#"><u>QXN76017.1</u></a><br>Product:hypothetical protein | PI: <a href="#"><u>AGC34929.1</u></a><br>Product:hypothetical protein |
| PI: <a href="#"><u>QXN76018.1</u></a><br>Product:hypothetical protein | PI: <a href="#"><u>AGC34928.1</u></a><br>Product:hypothetical protein |
| PI: <a href="#"><u>QXN76019.1</u></a><br>Product:hypothetical protein | PI: <a href="#"><u>AGC34926.1</u></a><br>Product:hypothetical protein |
| PI: <a href="#"><u>QXN76020.1</u></a><br>Product:hypothetical protein | PI: <a href="#"><u>AGC34925.1</u></a><br>Product:hypothetical protein |
| PI: <a href="#"><u>QXN76021.1</u></a><br>Product:hypothetical protein | PI: <a href="#"><u>AGC34924.1</u></a><br>Product:hypothetical protein |
| PI: <a href="#"><u>QXN76022.1</u></a><br>Product:hypothetical protein | PI: <a href="#"><u>AGC34923.1</u></a><br>Product:hypothetical protein |
| PI: <a href="#"><u>QXN76025.1</u></a><br>Product:hypothetical protein | PI: <a href="#"><u>AGC34922.1</u></a><br>Product:hypothetical protein |
| PI: <a href="#"><u>QXN76026.1</u></a><br>Product:hypothetical protein | PI: <a href="#"><u>AGC34921.1</u></a><br>Product:hypothetical protein |

|                                                                       |                                                                       |
|-----------------------------------------------------------------------|-----------------------------------------------------------------------|
| PI: <a href="#"><u>QXN76027.1</u></a><br>Product:hypothetical protein | PI: <a href="#"><u>AGC34920.1</u></a><br>Product:hypothetical protein |
| PI: <a href="#"><u>QXN76028.1</u></a><br>Product:hypothetical protein | PI: <a href="#"><u>AGC34919.1</u></a><br>Product:hypothetical protein |
| PI: <a href="#"><u>QXN76029.1</u></a><br>Product:hypothetical protein | PI: <a href="#"><u>AGC34918.1</u></a><br>Product:hypothetical protein |
| PI: <a href="#"><u>QXN76030.1</u></a><br>Product:hypothetical protein | PI: <a href="#"><u>AGC34917.1</u></a><br>Product:hypothetical protein |
| PI: <a href="#"><u>QXN76031.1</u></a><br>Product:hypothetical protein | PI: <a href="#"><u>AGC34916.1</u></a><br>Product:hypothetical protein |
| PI: <a href="#"><u>QXN76033.1</u></a><br>Product:hypothetical protein | PI: <a href="#"><u>AGC34915.1</u></a><br>Product:hypothetical protein |
| PI: <a href="#"><u>QXN76034.1</u></a><br>Product:hypothetical protein | PI: <a href="#"><u>AGC34914.1</u></a><br>Product:hypothetical protein |
| PI: <a href="#"><u>QXN76036.1</u></a><br>Product:hypothetical protein | PI: <a href="#"><u>AGC34912.1</u></a><br>Product:hypothetical protein |
| PI: <a href="#"><u>QXN76037.1</u></a><br>Product:hypothetical protein | PI: <a href="#"><u>AGC34911.1</u></a><br>Product:hypothetical protein |
| PI: <a href="#"><u>QXN76038.1</u></a><br>Product:hypothetical protein | PI: <a href="#"><u>AGC34910.1</u></a><br>Product:hypothetical protein |
| PI: <a href="#"><u>QXN76039.1</u></a><br>Product:hypothetical protein | PI: <a href="#"><u>AGC34909.1</u></a><br>Product:hypothetical protein |
| PI: <a href="#"><u>QXN76040.1</u></a><br>Product:hypothetical protein | PI: <a href="#"><u>AGC34908.1</u></a><br>Product:hypothetical protein |
| PI: <a href="#"><u>QXN76042.1</u></a><br>Product:hypothetical protein | PI: <a href="#"><u>AGC34907.1</u></a><br>Product:hypothetical protein |
| PI: <a href="#"><u>QXN76044.1</u></a><br>Product:hypothetical protein | PI: <a href="#"><u>AGC34906.1</u></a><br>Product:hypothetical protein |
| PI: <a href="#"><u>QXN76045.1</u></a><br>Product:hypothetical protein | PI: <a href="#"><u>AGC34904.1</u></a><br>Product:hypothetical protein |
| PI: <a href="#"><u>QXN76046.1</u></a><br>Product:hypothetical protein | PI: <a href="#"><u>AGC34903.1</u></a><br>Product:hypothetical protein |
| PI: <a href="#"><u>QXN76048.1</u></a><br>Product:hypothetical protein | PI: <a href="#"><u>AGC34902.1</u></a><br>Product:hypothetical protein |
| PI: <a href="#"><u>QXN76050.1</u></a><br>Product:hypothetical protein | PI: <a href="#"><u>AGC34901.1</u></a><br>Product:hypothetical protein |
| PI: <a href="#"><u>QXN76051.1</u></a><br>Product:hypothetical protein | PI: <a href="#"><u>AGC34900.1</u></a><br>Product:hypothetical protein |
| PI: <a href="#"><u>QXN76054.1</u></a><br>Product:hypothetical protein | PI: <a href="#"><u>AGC34899.1</u></a><br>Product:hypothetical protein |
| PI: <a href="#"><u>QXN76055.1</u></a><br>Product:hypothetical protein | PI: <a href="#"><u>AGC34898.1</u></a><br>Product:hypothetical protein |
| PI: <a href="#"><u>QXN76057.1</u></a><br>Product:hypothetical protein | PI: <a href="#"><u>AGC34897.1</u></a><br>Product:hypothetical protein |
| PI: <a href="#"><u>QXN76058.1</u></a><br>Product:hypothetical protein | PI: <a href="#"><u>AGC34896.1</u></a><br>Product:hypothetical protein |
| PI: <a href="#"><u>QXN76061.1</u></a><br>Product:hypothetical protein | PI: <a href="#"><u>AGC34895.1</u></a><br>Product:hypothetical protein |



|                                                                       |                                                                       |
|-----------------------------------------------------------------------|-----------------------------------------------------------------------|
| PI: <a href="#"><u>QXN76062.1</u></a><br>Product:hypothetical protein | PI: <a href="#"><u>AGC34894.1</u></a><br>Product:hypothetical protein |
| PI: <a href="#"><u>QXN76063.1</u></a><br>Product:hypothetical protein | PI: <a href="#"><u>AGC34893.1</u></a><br>Product:hypothetical protein |
| PI: <a href="#"><u>QXN76064.1</u></a><br>Product:hypothetical protein | PI: <a href="#"><u>AGC34892.1</u></a><br>Product:hypothetical protein |
| PI: <a href="#"><u>QXN76066.1</u></a><br>Product:hypothetical protein | PI: <a href="#"><u>AGC34891.1</u></a><br>Product:hypothetical protein |
| PI: <a href="#"><u>QXN76067.1</u></a><br>Product:hypothetical protein | PI: <a href="#"><u>AGC34890.1</u></a><br>Product:hypothetical protein |
| PI: <a href="#"><u>QXN76068.1</u></a><br>Product:hypothetical protein | PI: <a href="#"><u>AGC34889.1</u></a><br>Product:hypothetical protein |
| PI: <a href="#"><u>QXN76071.1</u></a><br>Product:hypothetical protein | PI: <a href="#"><u>AGC34888.1</u></a><br>Product:hypothetical protein |
| PI: <a href="#"><u>QXN76073.1</u></a><br>Product:hypothetical protein | PI: <a href="#"><u>AGC34887.1</u></a><br>Product:hypothetical protein |
| PI: <a href="#"><u>QXN76074.1</u></a><br>Product:hypothetical protein | PI: <a href="#"><u>AGC34886.1</u></a><br>Product:hypothetical protein |
| PI: <a href="#"><u>QXN76075.1</u></a><br>Product:hypothetical protein | PI: <a href="#"><u>AGC34885.1</u></a><br>Product:hypothetical protein |
| PI: <a href="#"><u>QXN76076.1</u></a><br>Product:hypothetical protein | PI: <a href="#"><u>AGC34884.1</u></a><br>Product:hypothetical protein |
| PI: <a href="#"><u>QXN76077.1</u></a><br>Product:hypothetical protein | PI: <a href="#"><u>AGC34883.1</u></a><br>Product:hypothetical protein |
| PI: <a href="#"><u>QXN76078.1</u></a><br>Product:hypothetical protein | PI: <a href="#"><u>AGC34882.1</u></a><br>Product:hypothetical protein |
| PI: <a href="#"><u>QXN76079.1</u></a><br>Product:hypothetical protein | PI: <a href="#"><u>AGC34881.1</u></a><br>Product:hypothetical protein |
| PI: <a href="#"><u>QXN76080.1</u></a><br>Product:hypothetical protein | PI: <a href="#"><u>AGC34880.1</u></a><br>Product:hypothetical protein |
| PI: <a href="#"><u>QXN76081.1</u></a><br>Product:hypothetical protein | PI: <a href="#"><u>AGC34879.1</u></a><br>Product:hypothetical protein |
| PI: <a href="#"><u>QXN76082.1</u></a><br>Product:hypothetical protein | PI: <a href="#"><u>AGC34878.1</u></a><br>Product:hypothetical protein |
| PI: <a href="#"><u>QXN76083.1</u></a><br>Product:hypothetical protein | PI: <a href="#"><u>AGC34877.1</u></a><br>Product:hypothetical protein |
| PI: <a href="#"><u>QXN76086.1</u></a><br>Product:hypothetical protein | PI: <a href="#"><u>AGC34875.1</u></a><br>Product:hypothetical protein |
| PI: <a href="#"><u>QXN76089.1</u></a><br>Product:hypothetical protein | PI: <a href="#"><u>AGC34874.1</u></a><br>Product:hypothetical protein |
| PI: <a href="#"><u>QXN76090.1</u></a><br>Product:hypothetical protein | PI: <a href="#"><u>AGC34873.1</u></a><br>Product:hypothetical protein |
| PI: <a href="#"><u>QXN76091.1</u></a><br>Product:hypothetical protein | PI: <a href="#"><u>AGC34872.1</u></a><br>Product:hypothetical protein |
| PI: <a href="#"><u>QXN76092.1</u></a><br>Product:hypothetical protein | PI: <a href="#"><u>AGC34871.1</u></a><br>Product:hypothetical protein |
| PI: <a href="#"><u>QXN76093.1</u></a><br>Product:hypothetical protein | PI: <a href="#"><u>AGC34870.1</u></a><br>Product:hypothetical protein |

|                                                                       |                                                                       |
|-----------------------------------------------------------------------|-----------------------------------------------------------------------|
| PI: <a href="#"><u>QXN76094.1</u></a><br>Product:hypothetical protein | PI: <a href="#"><u>AGC34869.1</u></a><br>Product:hypothetical protein |
| PI: <a href="#"><u>QXN76095.1</u></a><br>Product:hypothetical protein | PI: <a href="#"><u>AGC34868.1</u></a><br>Product:hypothetical protein |
| PI: <a href="#"><u>QXN76096.1</u></a><br>Product:hypothetical protein | PI: <a href="#"><u>AGC34867.1</u></a><br>Product:hypothetical protein |
| PI: <a href="#"><u>QXN76097.1</u></a><br>Product:hypothetical protein | PI: <a href="#"><u>AGC34866.1</u></a><br>Product:hypothetical protein |
| PI: <a href="#"><u>QXN76098.1</u></a><br>Product:hypothetical protein | PI: <a href="#"><u>AGC34865.1</u></a><br>Product:hypothetical protein |
| PI: <a href="#"><u>QXN76099.1</u></a><br>Product:hypothetical protein | PI: <a href="#"><u>AGC34864.1</u></a><br>Product:hypothetical protein |
| PI: <a href="#"><u>QXN76101.1</u></a><br>Product:hypothetical protein | PI: <a href="#"><u>AGC34863.1</u></a><br>Product:hypothetical protein |
| PI: <a href="#"><u>QXN76102.1</u></a><br>Product:hypothetical protein | PI: <a href="#"><u>AGC34862.1</u></a><br>Product:hypothetical protein |
| PI: <a href="#"><u>QXN76103.1</u></a><br>Product:hypothetical protein | PI: <a href="#"><u>AGC34861.1</u></a><br>Product:hypothetical protein |
| PI: <a href="#"><u>QXN76104.1</u></a><br>Product:hypothetical protein | PI: <a href="#"><u>AGC34860.1</u></a><br>Product:hypothetical protein |
| PI: <a href="#"><u>QXN76105.1</u></a><br>Product:hypothetical protein | PI: <a href="#"><u>AGC34859.1</u></a><br>Product:hypothetical protein |
| PI: <a href="#"><u>QXN76106.1</u></a><br>Product:hypothetical protein | PI: <a href="#"><u>AGC34858.1</u></a><br>Product:hypothetical protein |
| PI: <a href="#"><u>QXN76107.1</u></a><br>Product:hypothetical protein | PI: <a href="#"><u>AGC34857.1</u></a><br>Product:hypothetical protein |
| PI: <a href="#"><u>QXN76108.1</u></a><br>Product:hypothetical protein | PI: <a href="#"><u>AGC34856.1</u></a><br>Product:hypothetical protein |
| PI: <a href="#"><u>QXN76109.1</u></a><br>Product:hypothetical protein | PI: <a href="#"><u>AGC34855.1</u></a><br>Product:hypothetical protein |
| PI: <a href="#"><u>QXN76110.1</u></a><br>Product:hypothetical protein | PI: <a href="#"><u>AGC34854.1</u></a><br>Product:hypothetical protein |
| PI: <a href="#"><u>QXN76111.1</u></a><br>Product:hypothetical protein | PI: <a href="#"><u>AGC34853.1</u></a><br>Product:hypothetical protein |
| PI: <a href="#"><u>QXN76112.1</u></a><br>Product:hypothetical protein | PI: <a href="#"><u>AGC34852.1</u></a><br>Product:hypothetical protein |
| PI: <a href="#"><u>QXN76113.1</u></a><br>Product:hypothetical protein | PI: <a href="#"><u>AGC34851.1</u></a><br>Product:hypothetical protein |
| PI: <a href="#"><u>QXN76114.1</u></a><br>Product:hypothetical protein | PI: <a href="#"><u>AGC34850.1</u></a><br>Product:hypothetical protein |
| PI: <a href="#"><u>QXN76115.1</u></a><br>Product:hypothetical protein | PI: <a href="#"><u>AGC34849.1</u></a><br>Product:hypothetical protein |
| PI: <a href="#"><u>QXN76116.1</u></a><br>Product:hypothetical protein | PI: <a href="#"><u>AGC34848.1</u></a><br>Product:hypothetical protein |
| PI: <a href="#"><u>QXN76117.1</u></a><br>Product:hypothetical protein | PI: <a href="#"><u>AGC34847.1</u></a><br>Product:hypothetical protein |
| PI: <a href="#"><u>QXN76118.1</u></a><br>Product:hypothetical protein | PI: <a href="#"><u>AGC34846.1</u></a><br>Product:hypothetical protein |

|                                                                       |                                                                              |
|-----------------------------------------------------------------------|------------------------------------------------------------------------------|
| PI: <a href="#"><u>QXN76119.1</u></a><br>Product:hypothetical protein | PI: <a href="#"><u>AGC34845.1</u></a><br>Product:hypothetical protein        |
| PI: <a href="#"><u>QXN76120.1</u></a><br>Product:hypothetical protein | PI: <a href="#"><u>AGC34844.1</u></a><br>Product:hypothetical protein        |
| PI: <a href="#"><u>QXN76121.1</u></a><br>Product:hypothetical protein | PI: <a href="#"><u>AGC34843.1</u></a><br>Product:hypothetical protein        |
| PI: <a href="#"><u>QXN76122.1</u></a><br>Product:hypothetical protein | PI: <a href="#"><u>AGC34842.1</u></a><br>Product:hypothetical protein        |
| PI: <a href="#"><u>QXN76123.1</u></a><br>Product:hypothetical protein | PI: <a href="#"><u>AGC34841.1</u></a><br>Product:hypothetical protein        |
| PI: <a href="#"><u>QXN76124.1</u></a><br>Product:hypothetical protein | PI: <a href="#"><u>AGC34840.1</u></a><br>Product:hypothetical protein        |
| PI: <a href="#"><u>QXN76125.1</u></a><br>Product:hypothetical protein | PI: <a href="#"><u>AGC34839.1</u></a><br>Product:hypothetical protein        |
| PI: <a href="#"><u>QXN76126.1</u></a><br>Product:hypothetical protein | PI: <a href="#"><u>AGC34838.1</u></a><br>Product:hypothetical protein        |
| PI: <a href="#"><u>QXN76127.1</u></a><br>Product:hypothetical protein | PI: <a href="#"><u>AGC34837.1</u></a><br>Product:hypothetical protein        |
| PI: <a href="#"><u>QXN76128.1</u></a><br>Product:hypothetical protein | PI: <a href="#"><u>AGC34836.1</u></a><br>Product:hypothetical protein        |
| PI: <a href="#"><u>QXN76129.1</u></a><br>Product:hypothetical protein | PI: <a href="#"><u>AGC34835.1</u></a><br>Product:hypothetical protein        |
| PI: <a href="#"><u>QXN76131.1</u></a><br>Product:hypothetical protein | PI: <a href="#"><u>AGC34834.1</u></a><br>Product:hypothetical protein        |
| PI: <a href="#"><u>QXN76132.1</u></a><br>Product:hypothetical protein | PI: <a href="#"><u>AGC34833.1</u></a><br>Product:hypothetical protein        |
| PI: <a href="#"><u>QXN76133.1</u></a><br>Product:hypothetical protein | PI: <a href="#"><u>AGC34832.1</u></a><br>Product:hypothetical protein        |
| PI: <a href="#"><u>QXN76134.1</u></a><br>Product:hypothetical protein | PI: <a href="#"><u>AGC34831.1</u></a><br>Product:hypothetical protein        |
| PI: <a href="#"><u>QXN76135.1</u></a><br>Product:hypothetical protein | PI: <a href="#"><u>AGC34830.1</u></a><br>Product:hypothetical protein        |
| PI: <a href="#"><u>QXN76136.1</u></a><br>Product:hypothetical protein | PI: <a href="#"><u>AGC34829.1</u></a><br>Product:hypothetical protein        |
| PI: <a href="#"><u>QXN76137.1</u></a><br>Product:methylase            | PI: <a href="#"><u>AGC34828.1</u></a><br>Product:methylase                   |
| PI: <a href="#"><u>QXN76138.1</u></a><br>Product:hypothetical protein | PI: <a href="#"><u>AGC34827.1</u></a><br>Product:putative cytidyltransferase |
| PI: <a href="#"><u>QXN76139.1</u></a><br>Product:hypothetical protein | PI: <a href="#"><u>AGC34826.1</u></a><br>Product:hypothetical protein        |
| PI: <a href="#"><u>QXN76140.1</u></a><br>Product:hypothetical protein | PI: <a href="#"><u>AGC34825.1</u></a><br>Product:hypothetical protein        |
| PI: <a href="#"><u>QXN76141.1</u></a><br>Product:hypothetical protein | PI: <a href="#"><u>AGC34824.1</u></a><br>Product:hypothetical protein        |
| PI: <a href="#"><u>QXN76142.1</u></a><br>Product:hypothetical protein | PI: <a href="#"><u>AGC34823.1</u></a><br>Product:hypothetical protein        |
| PI: <a href="#"><u>QXN76143.1</u></a><br>Product:hypothetical protein | PI: <a href="#"><u>AGC34822.1</u></a><br>Product:hypothetical protein        |

|                                                                        |                                                                                              |
|------------------------------------------------------------------------|----------------------------------------------------------------------------------------------|
| PI: <a href="#"><u>QXN76144.1</u></a><br>Product:hypothetical protein  | PI: <a href="#"><u>AGC34821.1</u></a><br>Product:hypothetical protein                        |
| PI: <a href="#"><u>QXN76145.1</u></a><br>Product:hypothetical protein  | PI: <a href="#"><u>AGC34820.1</u></a><br>Product:hypothetical protein                        |
| PI: <a href="#"><u>QXN76147.1</u></a><br>Product:hypothetical protein  | PI: <a href="#"><u>AGC34818.1</u></a><br>Product:hypothetical protein                        |
| PI: <a href="#"><u>QXN76148.1</u></a><br>Product:hypothetical protein  | PI: <a href="#"><u>AGC34817.1</u></a><br>Product:hypothetical protein                        |
| PI: <a href="#"><u>QXN76150.1</u></a><br>Product:hypothetical protein  | PI: <a href="#"><u>AGC34816.1</u></a><br>Product:hypothetical protein                        |
| PI: <a href="#"><u>QXN76151.1</u></a><br>Product:hypothetical protein  | PI: <a href="#"><u>AGC34815.1</u></a><br>Product:hypothetical protein                        |
| PI: <a href="#"><u>QXN76152.1</u></a><br>Product:hypothetical protein  | PI: <a href="#"><u>AGC34814.1</u></a><br>Product:hypothetical protein                        |
| PI: <a href="#"><u>QXN76153.1</u></a><br>Product:hypothetical protein  | PI: <a href="#"><u>AGC34813.1</u></a><br>Product:hypothetical protein                        |
| PI: <a href="#"><u>QXN76154.1</u></a><br>Product:hypothetical protein  | PI: <a href="#"><u>AGC34812.1</u></a><br>Product:hypothetical protein                        |
| PI: <a href="#"><u>QXN76155.1</u></a><br>Product:hypothetical protein  | PI: <a href="#"><u>AGC34811.1</u></a><br>Product:hypothetical protein                        |
| PI: <a href="#"><u>QXN76156.1</u></a><br>Product:hypothetical protein  | PI: <a href="#"><u>AGC34810.1</u></a><br>Product:hypothetical protein                        |
| PI: <a href="#"><u>QXN76157.1</u></a><br>Product:RNA ligase            | PI: <a href="#"><u>AGC34809.1</u></a><br>Product:RNA ligase                                  |
| PI: <a href="#"><u>QXN76158.1</u></a><br>Product:hypothetical protein  | PI: <a href="#"><u>AGC34808.1</u></a><br>Product:hypothetical protein                        |
| PI: <a href="#"><u>QXN76159.1</u></a><br>Product:hypothetical protein  | PI: <a href="#"><u>AGC34807.1</u></a><br>Product:hypothetical protein                        |
| PI: <a href="#"><u>QXN76160.1</u></a><br>Product:hypothetical protein  | PI: <a href="#"><u>AGC34806.1</u></a><br>Product:hypothetical protein                        |
| PI: <a href="#"><u>QXN76161.1</u></a><br>Product:polynucleotide kinase | PI: <a href="#"><u>AGC34805.1</u></a><br>Product:polynucleotide 5'-kinase and 3'-phosphatase |
| PI: <a href="#"><u>QXN76162.1</u></a><br>Product:hypothetical protein  | PI: <a href="#"><u>AGC34803.1</u></a><br>Product:hypothetical protein                        |
| PI: <a href="#"><u>QXN76163.1</u></a><br>Product:hypothetical protein  | PI: <a href="#"><u>AGC34802.1</u></a><br>Product:hypothetical protein                        |
| PI: <a href="#"><u>QXN76164.1</u></a><br>Product:hypothetical protein  | PI: <a href="#"><u>AGC34801.1</u></a><br>Product:hypothetical protein                        |
| PI: <a href="#"><u>QXN76165.1</u></a><br>Product:hypothetical protein  | PI: <a href="#"><u>AGC34800.1</u></a><br>Product:hypothetical protein                        |
| PI: <a href="#"><u>QXN76166.1</u></a><br>Product:hypothetical protein  | PI: <a href="#"><u>AGC34799.1</u></a><br>Product:hypothetical protein                        |
| PI: <a href="#"><u>QXN76167.1</u></a><br>Product:hypothetical protein  | PI: <a href="#"><u>AGC34798.1</u></a><br>Product:hypothetical protein                        |
| PI: <a href="#"><u>QXN76168.1</u></a><br>Product:hypothetical protein  | PI: <a href="#"><u>AGC34797.1</u></a><br>Product:hypothetical protein                        |
| PI: <a href="#"><u>QXN76169.1</u></a><br>Product:hypothetical protein  | PI: <a href="#"><u>AGC34796.1</u></a><br>Product:hypothetical protein                        |

|                                                                                       |                                                                                                  |
|---------------------------------------------------------------------------------------|--------------------------------------------------------------------------------------------------|
| PI: <a href="#"><u>QXN76171.1</u></a><br>Product:hypothetical protein                 | PI: <a href="#"><u>AGC34795.1</u></a><br>Product:hypothetical protein                            |
| PI: <a href="#"><u>QXN76172.1</u></a><br>Product:serine/threonine-protein phosphatase | PI: <a href="#"><u>AGC34794.1</u></a><br>Product:putative serine/threonine protein phosphatase   |
| PI: <a href="#"><u>QXN76173.1</u></a><br>Product:hypothetical protein                 | PI: <a href="#"><u>AGC34793.1</u></a><br>Product:hypothetical protein                            |
| PI: <a href="#"><u>QXN76174.1</u></a><br>Product:hypothetical protein                 | PI: <a href="#"><u>AGC34792.1</u></a><br>Product:hypothetical protein                            |
| PI: <a href="#"><u>QXN76175.1</u></a><br>Product:hypothetical protein                 | PI: <a href="#"><u>AGC34791.1</u></a><br>Product:hypothetical protein                            |
| PI: <a href="#"><u>QXN76176.1</u></a><br>Product:hypothetical protein                 | PI: <a href="#"><u>AGC34790.1</u></a><br>Product:hypothetical protein                            |
| PI: <a href="#"><u>QXN76177.1</u></a><br>Product:DNA ligase                           | PI: <a href="#"><u>AGC34789.1</u></a><br>Product:DNA ligase                                      |
| PI: <a href="#"><u>QXN76178.1</u></a><br>Product:serine/threonine-protein phosphatase | PI: <a href="#"><u>AGC34788.1</u></a><br>Product:Ser/Thr protein phosphatase family protein      |
| PI: <a href="#"><u>QXN76179.1</u></a><br>Product:hypothetical protein                 | PI: <a href="#"><u>AGC34787.1</u></a><br>Product:hypothetical protein                            |
| PI: <a href="#"><u>QXN76180.1</u></a><br>Product:hypothetical protein                 | PI: <a href="#"><u>AGC34786.1</u></a><br>Product:hypothetical protein                            |
| PI: <a href="#"><u>QXN76181.1</u></a><br>Product:protease                             | PI: <a href="#"><u>AGC34785.1</u></a><br>Product:putative ATP-dependent Clp protease proteolytic |
| PI: <a href="#"><u>QXN76182.1</u></a><br>Product:hypothetical protein                 | PI: <a href="#"><u>AGC34784.1</u></a><br>Product:hypothetical protein                            |
| PI: <a href="#"><u>QXN76183.1</u></a><br>Product:hypothetical protein                 | PI: <a href="#"><u>AGC34783.1</u></a><br>Product:hypothetical protein                            |
| PI: <a href="#"><u>QXN76184.1</u></a><br>Product:hypothetical protein                 | PI: <a href="#"><u>AGC34782.1</u></a><br>Product:hypothetical protein                            |
| PI: <a href="#"><u>QXN76185.1</u></a><br>Product:hypothetical protein                 | PI: <a href="#"><u>AGC34781.1</u></a><br>Product:hypothetical protein                            |
| PI: <a href="#"><u>QXN76186.1</u></a><br>Product:deoxycytidylate deaminase            | PI: <a href="#"><u>AGC34779.1</u></a><br>Product:dCMP deaminase                                  |
| PI: <a href="#"><u>QXN76188.1</u></a><br>Product:structural protein                   | PI: <a href="#"><u>AGC34778.1</u></a><br>Product:putative structural protein                     |
| PI: <a href="#"><u>QXN76189.1</u></a><br>Product:hypothetical protein                 | PI: <a href="#"><u>AGC34777.1</u></a><br>Product:hypothetical protein                            |
| PI: <a href="#"><u>QXN76191.1</u></a><br>Product:hypothetical protein                 | PI: <a href="#"><u>AGC34776.1</u></a><br>Product:hypothetical protein                            |
| PI: <a href="#"><u>QXN76193.1</u></a><br>Product:NAD-dependent protein deacylase      | PI: <a href="#"><u>AGC34775.1</u></a><br>Product:putative Sir2-like protein                      |
| PI: <a href="#"><u>QXN76194.1</u></a><br>Product:nudix hydrolase                      | PI: <a href="#"><u>AGC34774.1</u></a><br>Product:nudix hydrolase                                 |
| PI: <a href="#"><u>QXN76195.1</u></a><br>Product:hypothetical protein                 | PI: <a href="#"><u>AGC34773.1</u></a><br>Product:hypothetical protein                            |
| PI: <a href="#"><u>QXN76196.1</u></a><br>Product:hypothetical protein                 | PI: <a href="#"><u>AGC34772.1</u></a><br>Product:hypothetical protein                            |

|                                                                                                  |                                                                                         |
|--------------------------------------------------------------------------------------------------|-----------------------------------------------------------------------------------------|
| PI: <a href="#"><u>QXN76197.1</u></a><br>Product:hypothetical protein                            | PI: <a href="#"><u>AGC34771.1</u></a><br>Product:hypothetical protein                   |
| PI: <a href="#"><u>QXN76198.1</u></a><br>Product:hypothetical protein                            | PI: <a href="#"><u>AGC34770.1</u></a><br>Product:hypothetical protein                   |
| PI: <a href="#"><u>QXN76199.1</u></a><br>Product:hypothetical protein                            | PI: <a href="#"><u>AGC34769.1</u></a><br>Product:hypothetical protein                   |
| PI: <a href="#"><u>QXN76200.1</u></a><br>Product:hypothetical protein                            | PI: <a href="#"><u>AGC34768.1</u></a><br>Product:hypothetical protein                   |
| PI: <a href="#"><u>QXN76201.1</u></a><br>Product:hypothetical protein                            | PI: <a href="#"><u>AGC34767.1</u></a><br>Product:hypothetical protein                   |
| PI: <a href="#"><u>QXN76203.1</u></a><br>Product:WGR domain-containing protein                   | PI: <a href="#"><u>AGC34766.1</u></a><br>Product:WGR domain-containing protein          |
| PI: <a href="#"><u>QXN76204.1</u></a><br>Product:hypothetical protein                            | PI: <a href="#"><u>AGC34765.1</u></a><br>Product:hypothetical protein                   |
| PI: <a href="#"><u>QXN76205.1</u></a><br>Product:hypothetical protein                            | PI: <a href="#"><u>AGC34764.1</u></a><br>Product:hypothetical protein                   |
| PI: <a href="#"><u>QXN76206.1</u></a><br>Product:hypothetical protein                            | PI: <a href="#"><u>AGC34763.1</u></a><br>Product:hypothetical protein                   |
| PI: <a href="#"><u>QXN76207.1</u></a><br>Product:hypothetical protein                            | PI: <a href="#"><u>AGC34762.1</u></a><br>Product:hypothetical protein                   |
| PI: <a href="#"><u>QXN76208.1</u></a><br>Product:hypothetical protein                            | PI: <a href="#"><u>AGC34761.1</u></a><br>Product:hypothetical protein                   |
| PI: <a href="#"><u>QXN76209.1</u></a><br>Product:hypothetical protein                            | PI: <a href="#"><u>AGC34760.1</u></a><br>Product:hypothetical protein                   |
| PI: <a href="#"><u>QXN76211.1</u></a><br>Product:hypothetical protein                            | PI: <a href="#"><u>AGC34759.1</u></a><br>Product:hypothetical protein                   |
| PI: <a href="#"><u>QXN76212.1</u></a><br>Product:hypothetical protein                            | PI: <a href="#"><u>AGC34758.1</u></a><br>Product:hypothetical protein                   |
| PI: <a href="#"><u>QXN76213.1</u></a><br>Product:hypothetical protein                            | PI: <a href="#"><u>AGC34757.1</u></a><br>Product:hypothetical protein                   |
| PI: <a href="#"><u>QXN76215.1</u></a><br>Product:anaerobic ribonucleoside-triphosphate reductase | PI: <a href="#"><u>AGC34756.1</u></a><br>Product:anaerobic NTP reductase large subunit  |
| PI: <a href="#"><u>QXN76216.1</u></a><br>Product:hypothetical protein                            | PI: <a href="#"><u>AGC34755.1</u></a><br>Product:hypothetical protein                   |
| PI: <a href="#"><u>QXN76217.1</u></a><br>Product:anaerobic ribonucleoside-triphosphate reductase | PI: <a href="#"><u>AGC34754.1</u></a><br>Product:anaerobic nucleotide reductase subunit |
| PI: <a href="#"><u>QXN76218.1</u></a><br>Product:hypothetical protein                            | PI: <a href="#"><u>AGC34753.1</u></a><br>Product:hypothetical protein                   |
| PI: <a href="#"><u>QXN76219.1</u></a><br>Product:hypothetical protein                            | PI: <a href="#"><u>AGC34752.1</u></a><br>Product:hypothetical protein                   |
| PI: <a href="#"><u>QXN76220.1</u></a><br>Product:hypothetical protein                            | PI: <a href="#"><u>AGC34751.1</u></a><br>Product:hypothetical protein                   |
| PI: <a href="#"><u>QXN76221.1</u></a><br>Product:hypothetical protein                            | PI: <a href="#"><u>AGC34750.1</u></a><br>Product:hypothetical protein                   |
| PI: <a href="#"><u>QXN76222.1</u></a><br>Product:hypothetical protein                            | PI: <a href="#"><u>AGC34749.1</u></a><br>Product:hypothetical protein                   |

[illegible]



|                                                                                       |                                                                                                |
|---------------------------------------------------------------------------------------|------------------------------------------------------------------------------------------------|
| PI: <a href="#"><u>QXN76248.1</u></a><br>Product:hypothetical protein                 | PI: <a href="#"><u>AGC34724.1</u></a><br>Product:hypothetical protein                          |
| PI: <a href="#"><u>QXN76249.1</u></a><br>Product:hypothetical protein                 | PI: <a href="#"><u>AGC34723.1</u></a><br>Product:hypothetical protein                          |
| PI: <a href="#"><u>QXN76250.1</u></a><br>Product:hypothetical protein                 | PI: <a href="#"><u>AGC34722.1</u></a><br>Product:hypothetical protein                          |
| PI: <a href="#"><u>QXN76251.1</u></a><br>Product:hypothetical protein                 | PI: <a href="#"><u>AGC34721.1</u></a><br>Product:hypothetical protein                          |
| PI: <a href="#"><u>QXN76252.1</u></a><br>Product:lysozyme                             | PI: <a href="#"><u>AGC34720.1</u></a><br>Product:putative lysozyme                             |
| PI: <a href="#"><u>QXN76253.1</u></a><br>Product:hypothetical protein                 | PI: <a href="#"><u>AGC34719.1</u></a><br>Product:hypothetical protein                          |
| PI: <a href="#"><u>QXN76254.1</u></a><br>Product:hypothetical protein                 | PI: <a href="#"><u>AGC34718.1</u></a><br>Product:hypothetical protein                          |
| PI: <a href="#"><u>QXN76255.1</u></a><br>Product:hypothetical protein                 | PI: <a href="#"><u>AGC34717.1</u></a><br>Product:hypothetical protein                          |
| PI: <a href="#"><u>QXN76256.1</u></a><br>Product:hypothetical protein                 | PI: <a href="#"><u>AGC34716.1</u></a><br>Product:hypothetical protein                          |
| PI: <a href="#"><u>QXN76257.1</u></a><br>Product:hypothetical protein                 | PI: <a href="#"><u>AGC34715.1</u></a><br>Product:hypothetical protein                          |
| PI: <a href="#"><u>QXN76258.1</u></a><br>Product:hypothetical protein                 | PI: <a href="#"><u>AGC34714.1</u></a><br>Product:hypothetical protein                          |
| PI: <a href="#"><u>QXN76259.1</u></a><br>Product:hypothetical protein                 | PI: <a href="#"><u>AGC34713.1</u></a><br>Product:hypothetical protein                          |
| PI: <a href="#"><u>QXN76260.1</u></a><br>Product:nudix hydrolase                      | PI: <a href="#"><u>AGC34712.1</u></a><br>Product:nudix hydrolase                               |
| PI: <a href="#"><u>QXN76261.1</u></a><br>Product:hypothetical protein                 | PI: <a href="#"><u>AGC34711.1</u></a><br>Product:hypothetical protein                          |
| PI: <a href="#"><u>QXN76262.1</u></a><br>Product:hypothetical protein                 | PI: <a href="#"><u>AGC34710.1</u></a><br>Product:hypothetical protein                          |
| PI: <a href="#"><u>QXN76263.1</u></a><br>Product:hypothetical protein                 | PI: <a href="#"><u>AGC34709.1</u></a><br>Product:hypothetical protein                          |
| PI: <a href="#"><u>QXN76264.1</u></a><br>Product:hypothetical protein                 | PI: <a href="#"><u>AGC34708.1</u></a><br>Product:hypothetical protein                          |
| PI: <a href="#"><u>QXN76265.1</u></a><br>Product:hypothetical protein                 | PI: <a href="#"><u>AGC34707.1</u></a><br>Product:hypothetical protein                          |
| PI: <a href="#"><u>QXN76266.1</u></a><br>Product:hypothetical protein                 | PI: <a href="#"><u>AGC34706.1</u></a><br>Product:hypothetical protein                          |
| PI: <a href="#"><u>QXN76267.1</u></a><br>Product:hypothetical protein                 | PI: <a href="#"><u>AGC34705.1</u></a><br>Product:hypothetical protein                          |
| PI: <a href="#"><u>QXN76268.1</u></a><br>Product:hypothetical protein                 | PI: <a href="#"><u>AGC34704.1</u></a><br>Product:hypothetical protein                          |
| PI: <a href="#"><u>QXN76269.1</u></a><br>Product:deoxynucleoside monophosphate kinase | PI: <a href="#"><u>AGC34703.1</u></a><br>Product:putative deoxynucleoside monophosphate kinase |
| PI: <a href="#"><u>QXN76270.1</u></a><br>Product:tail sheath protein                  | PI: <a href="#"><u>AGC34702.1</u></a><br>Product:tail sheath protein                           |

|                                                                                    |                                                                                          |
|------------------------------------------------------------------------------------|------------------------------------------------------------------------------------------|
| PI: <a href="#"><u>QXN76272.1</u></a><br>Product:hypothetical protein              | PI: <a href="#"><u>AGC34701.1</u></a><br>Product:hypothetical protein                    |
| PI: <a href="#"><u>QXN76273.1</u></a><br>Product:hypothetical protein              | PI: <a href="#"><u>AGC34700.1</u></a><br>Product:hypothetical protein                    |
| PI: <a href="#"><u>QXN76274.1</u></a><br>Product:hypothetical protein              | PI: <a href="#"><u>AGC34699.1</u></a><br>Product:hypothetical protein                    |
| PI: <a href="#"><u>QXN76275.1</u></a><br>Product:head completion protein           | PI: <a href="#"><u>AGC34698.1</u></a><br>Product:head completion protein                 |
| PI: <a href="#"><u>QXN76276.1</u></a><br>Product:hypothetical protein              | PI: <a href="#"><u>AGC34697.1</u></a><br>Product:hypothetical protein                    |
| PI: <a href="#"><u>QXN76277.1</u></a><br>Product:hypothetical protein              | PI: <a href="#"><u>AGC34696.1</u></a><br>Product:hypothetical protein                    |
| PI: <a href="#"><u>QXN76278.1</u></a><br>Product:hypothetical protein              | PI: <a href="#"><u>AGC34695.1</u></a><br>Product:hypothetical protein                    |
| PI: <a href="#"><u>QXN76279.1</u></a><br>Product:hypothetical protein              | PI: <a href="#"><u>AGC34694.1</u></a><br>Product:hypothetical protein                    |
| PI: <a href="#"><u>QXN76280.1</u></a><br>Product:hypothetical protein              | PI: <a href="#"><u>AGC34693.1</u></a><br>Product:hypothetical protein                    |
| PI: <a href="#"><u>QXN76281.1</u></a><br>Product:hypothetical protein              | PI: <a href="#"><u>AGC34692.1</u></a><br>Product:hypothetical protein                    |
| PI: <a href="#"><u>QXN76282.1</u></a><br>Product:hypothetical protein              | PI: <a href="#"><u>AGC34691.1</u></a><br>Product:hypothetical protein                    |
| PI: <a href="#"><u>QXN76283.1</u></a><br>Product:ATPase                            | PI: <a href="#"><u>AGC34690.1</u></a><br>Product:ATPase                                  |
| PI: <a href="#"><u>QXN76284.1</u></a><br>Product:HNH endonuclease                  | PI: <a href="#"><u>AGC34689.1</u></a><br>Product:putative HNH endonuclease               |
| PI: <a href="#"><u>QXN76285.1</u></a><br>Product:hypothetical protein              | PI: <a href="#"><u>AGC34688.1</u></a><br>Product:hypothetical protein                    |
| PI: <a href="#"><u>QXN76286.1</u></a><br>Product:hypothetical protein              | PI: <a href="#"><u>AGC34687.1</u></a><br>Product:hypothetical protein                    |
| PI: <a href="#"><u>QXN76287.1</u></a><br>Product:hypothetical protein              | PI: <a href="#"><u>AGC34686.1</u></a><br>Product:hypothetical protein                    |
| PI: <a href="#"><u>QXN76288.1</u></a><br>Product:thymidylate synthase              | PI: <a href="#"><u>AGC34685.1</u></a><br>Product:dTMP thymidylate synthase               |
| PI: <a href="#"><u>QXN76289.1</u></a><br>Product:hypothetical protein              | PI: <a href="#"><u>AGC34684.1</u></a><br>Product:hypothetical protein                    |
| PI: <a href="#"><u>QXN76290.1</u></a><br>Product:hypothetical protein              | PI: <a href="#"><u>AGC34682.1</u></a><br>Product:hypothetical protein                    |
| PI: <a href="#"><u>QXN76291.1</u></a><br>Product:long tail fiber proximal subunit  | PI: <a href="#"><u>AGC34681.1</u></a><br>Product:YadA domain protein                     |
| PI: <a href="#"><u>QXN76292.1</u></a><br>Product:long tail fiber proximal subunit  | PI: <a href="#"><u>AGC34681.1</u></a><br>Product:YadA domain protein                     |
| PI: <a href="#"><u>QXN76293.1</u></a><br>Product:hypothetical protein              | PI: <a href="#"><u>AGC35228.1</u></a><br>Product:hypothetical protein                    |
| PI: <a href="#"><u>QXN76294.1</u></a><br>Product:colanic acid biosynthesis protein | PI: <a href="#"><u>AGC35227.1</u></a><br>Product:putative colanic acid degrading protein |
| PI: <a href="#"><u>QXN76295.1</u></a><br>Product:hypothetical protein              | PI: <a href="#"><u>AGC35226.1</u></a><br>Product:hypothetical protein                    |

|                                                                                          |                                                                                               |
|------------------------------------------------------------------------------------------|-----------------------------------------------------------------------------------------------|
| PI: <a href="#"><u>QXN76296.1</u></a><br>Product:hypothetical protein                    | PI: <a href="#"><u>AGC35225.1</u></a><br>Product:hypothetical protein                         |
| PI: <a href="#"><u>QXN76297.1</u></a><br>Product:hypothetical protein                    | PI: <a href="#"><u>AGC35224.1</u></a><br>Product:hypothetical protein                         |
| PI: <a href="#"><u>QXN76298.1</u></a><br>Product:hypothetical protein                    | PI: <a href="#"><u>AGC35223.1</u></a><br>Product:hypothetical protein                         |
| PI: <a href="#"><u>QXN76299.1</u></a><br>Product:nudix hydrolase                         | PI: <a href="#"><u>AGC35222.1</u></a><br>Product:putative MutT/NUDIX hydrolase family protein |
| PI: <a href="#"><u>QXN76300.1</u></a><br>Product:hypothetical protein                    | PI: <a href="#"><u>AGC35221.1</u></a><br>Product:hypothetical protein                         |
| PI: <a href="#"><u>QXN76301.1</u></a><br>Product:hypothetical protein                    | PI: <a href="#"><u>AGC35220.1</u></a><br>Product:hypothetical protein                         |
| PI: <a href="#"><u>QXN76302.1</u></a><br>Product:hypothetical protein                    | PI: <a href="#"><u>AGC35219.1</u></a><br>Product:hypothetical protein                         |
| PI: <a href="#"><u>QXN76303.1</u></a><br>Product:hypothetical protein                    | PI: <a href="#"><u>AGC35218.1</u></a><br>Product:hypothetical protein                         |
| PI: <a href="#"><u>QXN76304.1</u></a><br>Product:hypothetical protein                    | PI: <a href="#"><u>AGC35217.1</u></a><br>Product:hypothetical protein                         |
| PI: <a href="#"><u>QXN76305.1</u></a><br>Product:hypothetical protein                    | PI: <a href="#"><u>AGC35216.1</u></a><br>Product:hypothetical protein                         |
| PI: <a href="#"><u>QXN76306.1</u></a><br>Product:baseplate hub subunit and tail lysozyme | PI: <a href="#"><u>AGC35215.1</u></a><br>Product:T4-like lysozyme                             |
| PI: <a href="#"><u>QXN76307.1</u></a><br>Product:virion protein and lysozyme murein      | PI: <a href="#"><u>AGC35214.1</u></a><br>Product:putative virion protein and lysozyme murein  |
| PI: <a href="#"><u>QXN76308.1</u></a><br>Product:hypothetical protein                    | PI: <a href="#"><u>AGC35213.1</u></a><br>Product:hypothetical protein                         |
| PI: <a href="#"><u>QXN76309.1</u></a><br>Product:hypothetical protein                    | PI: <a href="#"><u>AGC35212.1</u></a><br>Product:hypothetical protein                         |
| PI: <a href="#"><u>QXN76310.1</u></a><br>Product:hypothetical protein                    | PI: <a href="#"><u>AGC35211.1</u></a><br>Product:hypothetical protein                         |
| PI: <a href="#"><u>QXN76311.1</u></a><br>Product:RNA polymerase sigma factor             | PI: <a href="#"><u>AGC35210.1</u></a><br>Product:RNA polymerase sigma factor                  |
| PI: <a href="#"><u>QXN76312.1</u></a><br>Product:nuclease subunit                        | PI: <a href="#"><u>AGC35209.1</u></a><br>Product:endonuclease subunit                         |
| PI: <a href="#"><u>QXN76313.1</u></a><br>Product:recombination nuclease subunit          | PI: <a href="#"><u>AGC35208.1</u></a><br>Product:recombination endonuclease subunit           |
| PI: <a href="#"><u>QXN76314.1</u></a><br>Product:DNA endonuclease VII                    | PI: <a href="#"><u>AGC35207.1</u></a><br>Product:recombination endonuclease VII               |
| PI: <a href="#"><u>QXN76315.1</u></a><br>Product:hypothetical protein                    | PI: <a href="#"><u>AGC35206.1</u></a><br>Product:hypothetical protein                         |
| PI: <a href="#"><u>QXN76316.1</u></a><br>Product:baseplate hub subunit                   | PI: <a href="#"><u>AGC35205.1</u></a><br>Product:baseplate hub subunit                        |
| PI: <a href="#"><u>QXN76317.1</u></a><br>Product:hypothetical protein                    | PI: <a href="#"><u>AGC35204.1</u></a><br>Product:hypothetical protein                         |
| PI: <a href="#"><u>QXN76318.1</u></a><br>Product:portal protein                          | PI: <a href="#"><u>AGC35203.1</u></a><br>Product:portal vertex protein                        |

|                                                                                 |                                                                                                |
|---------------------------------------------------------------------------------|------------------------------------------------------------------------------------------------|
| PI: <a href="#"><u>QXN76319.1</u></a><br>Product:hypothetical protein           | PI: <a href="#"><u>AGC35202.1</u></a><br>Product:hypothetical protein                          |
| PI: <a href="#"><u>QXN76320.1</u></a><br>Product:hypothetical protein           | PI: <a href="#"><u>AGC35201.1</u></a><br>Product:hypothetical protein                          |
| PI: <a href="#"><u>QXN76321.1</u></a><br>Product:prohead assembly protein       | PI: <a href="#"><u>AGC35200.1</u></a><br>Product:prohead core scaffolding protein and protease |
| PI: <a href="#"><u>QXN76322.1</u></a><br>Product:hypothetical protein           | PI: <a href="#"><u>AGC35199.1</u></a><br>Product:hypothetical protein                          |
| PI: <a href="#"><u>QXN76323.1</u></a><br>Product:major capsid protein           | PI: <a href="#"><u>AGC35198.1</u></a><br>Product:major capsid protein                          |
| PI: <a href="#"><u>QXN76324.1</u></a><br>Product:hypothetical protein           | PI: <a href="#"><u>AGC34986.1</u></a><br>Product:hypothetical protein                          |
| PI: <a href="#"><u>QXN76325.1</u></a><br>Product:hypothetical protein           | PI: <a href="#"><u>AGC35197.1</u></a><br>Product:hypothetical protein                          |
| PI: <a href="#"><u>QXN76326.1</u></a><br>Product:hypothetical protein           | PI: <a href="#"><u>AGC35196.1</u></a><br>Product:hypothetical protein                          |
| PI: <a href="#"><u>QXN76327.1</u></a><br>Product:hypothetical protein           | PI: <a href="#"><u>AGC35195.1</u></a><br>Product:hypothetical protein                          |
| PI: <a href="#"><u>QXN76328.1</u></a><br>Product:tail fiber assembly protein    | PI: <a href="#"><u>AGC35194.1</u></a><br>Product:hypothetical protein                          |
| PI: <a href="#"><u>QXN76329.1</u></a><br>Product:hypothetical protein           | PI: <a href="#"><u>AGC35193.1</u></a><br>Product:hypothetical protein                          |
| PI: <a href="#"><u>QXN76330.1</u></a><br>Product:DNA polymerase                 | PI: <a href="#"><u>AGC35192.1</u></a><br>Product:DNA polymerase                                |
| PI: <a href="#"><u>QXN76331.1</u></a><br>Product:hypothetical protein           | PI: <a href="#"><u>AGC35191.1</u></a><br>Product:hypothetical protein                          |
| PI: <a href="#"><u>QXN76332.1</u></a><br>Product:hypothetical protein           | PI: <a href="#"><u>AGC35190.1</u></a><br>Product:hypothetical protein                          |
| PI: <a href="#"><u>QXN76333.1</u></a><br>Product:hypothetical protein           | PI: <a href="#"><u>AGC35189.1</u></a><br>Product:hypothetical protein                          |
| PI: <a href="#"><u>QXN76334.1</u></a><br>Product:hypothetical protein           | PI: <a href="#"><u>AGC35188.1</u></a><br>Product:hypothetical protein                          |
| PI: <a href="#"><u>QXN76335.1</u></a><br>Product:hypothetical protein           | PI: <a href="#"><u>AGC35187.1</u></a><br>Product:hypothetical protein                          |
| PI: <a href="#"><u>QXN76336.1</u></a><br>Product:hypothetical protein           | PI: <a href="#"><u>AGC35186.1</u></a><br>Product:hypothetical protein                          |
| PI: <a href="#"><u>QXN76337.1</u></a><br>Product:hypothetical protein           | PI: <a href="#"><u>AGC35185.1</u></a><br>Product:hypothetical protein                          |
| PI: <a href="#"><u>QXN76338.1</u></a><br>Product:hypothetical protein           | PI: <a href="#"><u>AGC35184.1</u></a><br>Product:hypothetical protein                          |
| PI: <a href="#"><u>QXN76339.1</u></a><br>Product:RNase H-like 5'-3' exonuclease | PI: <a href="#"><u>AGC35183.1</u></a><br>Product:RnaseH                                        |
| PI: <a href="#"><u>QXN76340.1</u></a><br>Product:hypothetical protein           | PI: <a href="#"><u>AGC35182.1</u></a><br>Product:hypothetical protein                          |
| PI: <a href="#"><u>QXN76341.1</u></a><br>Product:hypothetical protein           | PI: <a href="#"><u>AGC35181.1</u></a><br>Product:hypothetical protein                          |

|                                                                                   |                                                                                   |
|-----------------------------------------------------------------------------------|-----------------------------------------------------------------------------------|
| PI: <a href="#"><u>QXN76343.1</u></a><br>Product:terminase large subunit          | PI: <a href="#"><u>AGC35180.1</u></a><br>Product:large terminase protein          |
| PI: <a href="#"><u>QXN76344.1</u></a><br>Product:hypothetical protein             | PI: <a href="#"><u>AGC35179.1</u></a><br>Product:hypothetical protein             |
| PI: <a href="#"><u>QXN76345.1</u></a><br>Product:hypothetical protein             | PI: <a href="#"><u>AGC35178.1</u></a><br>Product:hypothetical protein             |
| PI: <a href="#"><u>QXN76346.1</u></a><br>Product:recombination and repair protein | PI: <a href="#"><u>AGC35177.1</u></a><br>Product:recombination and repair protein |
| PI: <a href="#"><u>QXN76347.1</u></a><br>Product:hypothetical protein             | PI: <a href="#"><u>AGC35176.1</u></a><br>Product:hypothetical protein             |
| PI: <a href="#"><u>QXN76348.1</u></a><br>Product:exodeoxyribonuclease X           | PI: <a href="#"><u>AGC35175.1</u></a><br>Product:putative exonuclease             |
| PI: <a href="#"><u>QXN76349.1</u></a><br>Product:ATP-dependent DNA helicase       | PI: <a href="#"><u>AGC35174.1</u></a><br>Product:helicase                         |
| PI: <a href="#"><u>QXN76350.1</u></a><br>Product:hypothetical protein             | PI: <a href="#"><u>AGC35173.1</u></a><br>Product:hypothetical protein             |
| PI: <a href="#"><u>QXN76351.1</u></a><br>Product:hypothetical protein             | PI: <a href="#"><u>AGC35172.1</u></a><br>Product:hypothetical protein             |
| PI: <a href="#"><u>QXN76352.1</u></a><br>Product:hypothetical protein             | PI: <a href="#"><u>AGC35171.1</u></a><br>Product:hypothetical protein             |
| PI: <a href="#"><u>QXN76353.1</u></a><br>Product:hypothetical protein             | PI: <a href="#"><u>AGC35170.1</u></a><br>Product:hypothetical protein             |
| PI: <a href="#"><u>QXN76354.1</u></a><br>Product:hypothetical protein             | PI: <a href="#"><u>AGC35169.1</u></a><br>Product:hypothetical protein             |
| PI: <a href="#"><u>QXN76355.1</u></a><br>Product:hypothetical protein             | PI: <a href="#"><u>AGC35168.1</u></a><br>Product:hypothetical protein             |
| PI: <a href="#"><u>QXN76356.1</u></a><br>Product:hypothetical protein             | PI: <a href="#"><u>AGC35167.1</u></a><br>Product:hypothetical protein             |
| PI: <a href="#"><u>QXN76357.1</u></a><br>Product:hypothetical protein             | PI: <a href="#"><u>AGC35166.1</u></a><br>Product:hypothetical protein             |
| PI: <a href="#"><u>QXN76358.1</u></a><br>Product:DNA primase subunit              | PI: <a href="#"><u>AGC35165.1</u></a><br>Product:DNA primase subunit              |
| PI: <a href="#"><u>QXN76359.1</u></a><br>Product:helicase                         | PI: <a href="#"><u>AGC35164.1</u></a><br>Product:DNA primase-helicase subunit     |
| PI: <a href="#"><u>QXN76360.1</u></a><br>Product:hypothetical protein             | PI: <a href="#"><u>AGC35163.1</u></a><br>Product:hypothetical protein             |
| PI: <a href="#"><u>QXN76361.1</u></a><br>Product:hypothetical protein             | PI: <a href="#"><u>AGC35162.1</u></a><br>Product:hypothetical protein             |
| PI: <a href="#"><u>QXN76362.1</u></a><br>Product:hypothetical protein             | PI: <a href="#"><u>AGC35161.1</u></a><br>Product:hypothetical protein             |
| PI: <a href="#"><u>QXN76363.1</u></a><br>Product:hypothetical protein             | PI: <a href="#"><u>AGC35160.1</u></a><br>Product:hypothetical protein             |
| PI: <a href="#"><u>QXN76364.1</u></a><br>Product:hypothetical protein             | PI: <a href="#"><u>AGC35159.1</u></a><br>Product:hypothetical protein             |
| PI: <a href="#"><u>QXN76365.1</u></a><br>Product:hypothetical protein             | PI: <a href="#"><u>AGC35158.1</u></a><br>Product:hypothetical protein             |
| PI: <a href="#"><u>QXN76366.1</u></a><br>Product:hypothetical protein             | PI: <a href="#"><u>AGC35157.1</u></a><br>Product:hypothetical protein             |

|                                                                               |                                                                               |
|-------------------------------------------------------------------------------|-------------------------------------------------------------------------------|
| PI: <u>QXN76367.1</u><br>Product:hypothetical protein                         | PI: <u>AGC35156.1</u><br>Product:hypothetical protein                         |
| PI: <u>QXN76368.1</u><br>Product:exonuclease                                  | PI: <u>AGC35155.1</u><br>Product:putative exonuclease                         |
| PI: <u>QXN76369.1</u><br>Product:hypothetical protein                         | PI: <u>GC35154.1</u><br>Product:hypothetical protein                          |
| PI: <u>QXN76370.1</u><br>Product:hypothetical protein                         | PI: <u>AGC35153.1</u><br>Product:hypothetical protein                         |
| PI: <u>QXN76371.1</u><br>Product:aerobic ribonucleoside-diphosphate reductase | PI: <u>AGC35152.1</u><br>Product:aerobic ribonucleoside diphosphate reductase |
| PI: <u>QXN76373.1</u><br>Product:aerobic ribonucleoside-diphosphate reductase | PI: <u>AGC35151.1</u><br>Product:aerobic ribonucleoside diphosphate reductase |
| PI: <u>QXN76374.1</u><br>Product:hypothetical protein                         | PI: <u>AGC35150.1</u><br>Product:hypothetical protein                         |
| PI: <u>QXN76375.1</u><br>Product:hypothetical protein                         | PI: <u>AGC35149.1</u><br>Product:hypothetical protein                         |
| PI: <u>QXN76376.1</u><br>Product:hypothetical protein                         | PI: <u>AGC35148.1</u><br>Product:hypothetical protein                         |
| PI: <u>QXN76377.1</u><br>Product:hypothetical protein                         | PI: <u>AGC35147.1</u><br>Product:hypothetical protein                         |
| PI: <u>QXN76378.1</u><br>Product:hypothetical protein                         | PI: <u>AGC35146.1</u><br>Product:hypothetical protein                         |
| PI: <u>QXN76380.1</u><br>Product:hypothetical protein                         | PI: <u>AGC35145.1</u><br>Product:hypothetical protein                         |
| PI: <u>QXN76381.1</u><br>Product:hypothetical protein                         | PI: <u>AGC35144.1</u><br>Product:hypothetical protein                         |
| PI: <u>QXN76382.1</u><br>Product:dihydrofolate reductase                      | PI: <u>AGC35143.1</u><br>Product:dihydrofolate reductase                      |
| PI: <u>QXN76383.1</u><br>Product:ribonuclease H                               | PI: <u>AGC35142.1</u><br>Product:ribonuclease HI                              |
| PI: <u>QXN76384.1</u><br>Product:ATP-dependent DNA helicase                   | PI: <u>AGC35141.1</u><br>Product:DNA helicase                                 |
| PI: <u>QXN76385.1</u><br>Product:hypothetical protein                         | PI: <u>AGC35140.1</u><br>Product:hypothetical protein                         |
| PI: <u>QXN76386.1</u><br>Product:hypothetical protein                         | PI: <u>AGC35139.1</u><br>Product:hypothetical protein                         |
| PI: <u>QXN76387.1</u><br>Product:hypothetical protein                         | PI: <u>AGC35138.1</u><br>Product:hypothetical protein                         |
| PI: <u>QXN76388.1</u><br>Product:hypothetical protein                         | PI: <u>AGC35137.1</u><br>Product:hypothetical protein                         |
| PI: <u>QXN76389.1</u><br>Product:hypothetical protein                         | PI: <u>AGC35136.1</u><br>Product:hypothetical protein                         |
| PI: <u>QXN76390.1</u><br>Product:hypothetical protein                         | PI: <u>AGC35135.1</u><br>Product:hypothetical protein                         |
| PI: <u>QXN76391.1</u><br>Product:hypothetical protein                         | PI: <u>AGC35134.1</u><br>Product:hypothetical protein                         |

|                                                                                     |                                                                                                |
|-------------------------------------------------------------------------------------|------------------------------------------------------------------------------------------------|
| PI: <a href="#"><u>QXN76392.1</u></a><br>Product:topoisomerase II large subunit     | PI: <a href="#"><u>AGC35133.1</u></a><br>Product:topoisomerase II large subunit                |
| PI: <a href="#"><u>QXN76393.1</u></a><br>Product:topoisomerase II medium subunit    | PI: <a href="#"><u>AGC35132.1</u></a><br>Product:topoisomerase II medium subunit               |
| PI: <a href="#"><u>QXN76394.1</u></a><br>Product:hypothetical protein               | PI: <a href="#"><u>AGC35131.1</u></a><br>Product:hypothetical protein                          |
| PI: <a href="#"><u>QXN76395.1</u></a><br>Product:hypothetical protein               | PI: <a href="#"><u>AGC35130.1</u></a><br>Product:hypothetical protein                          |
| PI: <a href="#"><u>QXN76396.1</u></a><br>Product:hypothetical protein               | PI: <a href="#"><u>AGC35129.1</u></a><br>Product:hypothetical protein                          |
| PI: <a href="#"><u>QXN76397.1</u></a><br>Product:hypothetical protein               | PI: <a href="#"><u>AGC35128.1</u></a><br>Product:hypothetical protein                          |
| PI: <a href="#"><u>QXN76398.1</u></a><br>Product:hypothetical protein               | PI: <a href="#"><u>AGC35127.1</u></a><br>Product:hypothetical protein                          |
| PI: <a href="#"><u>QXN76399.1</u></a><br>Product:hypothetical protein               | PI: <a href="#"><u>AGC35126.1</u></a><br>Product:hypothetical protein                          |
| PI: <a href="#"><u>QXN76400.1</u></a><br>Product:replication factor C small subunit | PI: <a href="#"><u>AGC35125.1</u></a><br>Product:clamp loader subunit DNA polymerase accessory |
| PI: <a href="#"><u>QXN76401.1</u></a><br>Product:hypothetical protein               | PI: <a href="#"><u>AGC35124.1</u></a><br>Product:hypothetical protein                          |
| PI: <a href="#"><u>QXN76402.1</u></a><br>Product:hypothetical protein               | PI: <a href="#"><u>AGC35123.1</u></a><br>Product:hypothetical protein                          |
| PI: <a href="#"><u>QXN76403.1</u></a><br>Product:hypothetical protein               | PI: <a href="#"><u>AGC35122.1</u></a><br>Product:hypothetical protein                          |
| PI: <a href="#"><u>QXN76404.1</u></a><br>Product:hypothetical protein               | PI: <a href="#"><u>AGC35121.1</u></a><br>Product:hypothetical protein                          |
| PI: <a href="#"><u>QXN76405.1</u></a><br>Product:hypothetical protein               | PI: <a href="#"><u>AGC35120.1</u></a><br>Product:hypothetical protein                          |
| PI: <a href="#"><u>QXN76406.1</u></a><br>Product:hypothetical protein               | PI: <a href="#"><u>AGC35119.1</u></a><br>Product:hypothetical protein                          |
| PI: <a href="#"><u>QXN76407.1</u></a><br>Product:peptidase                          | PI: <a href="#"><u>AGC35118.1</u></a><br>Product:putative peptidase                            |
| PI: <a href="#"><u>QXN76408.1</u></a><br>Product:hypothetical protein               | PI: <a href="#"><u>AGC35117.1</u></a><br>Product:hypothetical protein                          |
| PI: <a href="#"><u>QXN76409.1</u></a><br>Product:hypothetical protein               | PI: <a href="#"><u>AGC35116.1</u></a><br>Product:hypothetical protein                          |
| PI: <a href="#"><u>QXN76410.1</u></a><br>Product:hypothetical protein               | PI: <a href="#"><u>AGC35115.1</u></a><br>Product:hypothetical protein                          |
| PI: <a href="#"><u>QXN76411.1</u></a><br>Product:hypothetical protein               | PI: <a href="#"><u>AGC35114.1</u></a><br>Product:hypothetical protein                          |
| PI: <a href="#"><u>QXN76412.1</u></a><br>Product:hypothetical protein               | PI: <a href="#"><u>AGC35113.1</u></a><br>Product:hypothetical protein                          |
| PI: <a href="#"><u>QXN76413.1</u></a><br>Product:hypothetical protein               | PI: <a href="#"><u>AGC35112.1</u></a><br>Product:hypothetical protein                          |
| PI: <a href="#"><u>QXN76414.1</u></a><br>Product:hypothetical protein               | PI: <a href="#"><u>AGC35111.1</u></a><br>Product:hypothetical protein                          |



|                                                                       |                                                                                 |
|-----------------------------------------------------------------------|---------------------------------------------------------------------------------|
| PI: <a href="#"><u>QXN76415.1</u></a><br>Product:hypothetical protein | PI: <a href="#"><u>AGC35110.1</u></a><br>Product:hypothetical protein           |
| PI: <a href="#"><u>QXN76417.1</u></a><br>Product:hypothetical protein | PI: <a href="#"><u>AGC35109.1</u></a><br>Product:hypothetical protein           |
| PI: <a href="#"><u>QXN76418.1</u></a><br>Product:hypothetical protein | PI: <a href="#"><u>AGC35108.1</u></a><br>Product:hypothetical protein           |
| PI: <a href="#"><u>QXN76419.1</u></a><br>Product:hypothetical protein | PI: <a href="#"><u>AGC35107.1</u></a><br>Product:hypothetical protein           |
| PI: <a href="#"><u>QXN76420.1</u></a><br>Product:hypothetical protein | PI: <a href="#"><u>AGC35106.1</u></a><br>Product:hypothetical protein           |
| PI: <a href="#"><u>QXN76421.1</u></a><br>Product:hypothetical protein | PI: <a href="#"><u>AGC35105.1</u></a><br>Product:hypothetical protein           |
| PI: <a href="#"><u>QXN76422.1</u></a><br>Product:hypothetical protein | PI: <a href="#"><u>AGC35104.1</u></a><br>Product:hypothetical protein           |
| PI: <a href="#"><u>QXN76423.1</u></a><br>Product:hypothetical protein | PI: <a href="#"><u>AGC35103.1</u></a><br>Product:hypothetical protein           |
| PI: <a href="#"><u>QXN76424.1</u></a><br>Product:hypothetical protein | PI: <a href="#"><u>AGC35102.1</u></a><br>Product:hypothetical protein           |
| PI: <a href="#"><u>QXN76425.1</u></a><br>Product:hypothetical protein | PI: <a href="#"><u>AGC35101.1</u></a><br>Product:hypothetical protein           |
| PI: <a href="#"><u>QXN76426.1</u></a><br>Product:hypothetical protein | PI: <a href="#"><u>AGC35100.1</u></a><br>Product:hypothetical protein           |
| PI: <a href="#"><u>QXN76427.1</u></a><br>Product:hypothetical protein | PI: <a href="#"><u>AGC35099.1</u></a><br>Product:hypothetical protein           |
| PI: <a href="#"><u>QXN76428.1</u></a><br>Product:hypothetical protein | PI: <a href="#"><u>AGC35098.1</u></a><br>Product:hypothetical protein           |
| PI: <a href="#"><u>QXN76430.1</u></a><br>Product:hypothetical protein | PI: <a href="#"><u>AGC35097.1</u></a><br>Product:hypothetical protein           |
| PI: <a href="#"><u>QXN76431.1</u></a><br>Product:hypothetical protein | PI: <a href="#"><u>AGC35096.1</u></a><br>Product:putative DNA-methyltransferase |
| PI: <a href="#"><u>QXN76432.1</u></a><br>Product:hypothetical protein | PI: <a href="#"><u>AGC35095.1</u></a><br>Product:hypothetical protein           |
| PI: <a href="#"><u>QXN76433.1</u></a><br>Product:hypothetical protein | PI: <a href="#"><u>AGC35094.1</u></a><br>Product:hypothetical protein           |
| PI: <a href="#"><u>QXN76434.1</u></a><br>Product:hypothetical protein | PI: <a href="#"><u>AGC35093.1</u></a><br>Product:hypothetical protein           |
| PI: <a href="#"><u>QXN76435.1</u></a><br>Product:hypothetical protein | PI: <a href="#"><u>AGC35092.1</u></a><br>Product:hypothetical protein           |
| PI: <a href="#"><u>QXN76436.1</u></a><br>Product:hypothetical protein | PI: <a href="#"><u>AGC35091.1</u></a><br>Product:hypothetical protein           |
| PI: <a href="#"><u>QXN76437.1</u></a><br>Product:hypothetical protein | PI: <a href="#"><u>AGC35090.1</u></a><br>Product:hypothetical protein           |
| PI: <a href="#"><u>QXN76438.1</u></a><br>Product:hypothetical protein | PI: <a href="#"><u>AGC35089.1</u></a><br>Product:hypothetical protein           |
| PI: <a href="#"><u>QXN76439.1</u></a><br>Product:hypothetical protein | PI: <a href="#"><u>AGC35088.1</u></a><br>Product:hypothetical protein           |
| PI: <a href="#"><u>QXN76440.1</u></a><br>Product:hypothetical protein | PI: <a href="#"><u>AGC35087.1</u></a><br>Product:hypothetical protein           |

|                                                                       |                                                                       |
|-----------------------------------------------------------------------|-----------------------------------------------------------------------|
| PI: <a href="#"><u>QXN76441.1</u></a><br>Product:hypothetical protein | PI: <a href="#"><u>AGC35086.1</u></a><br>Product:hypothetical protein |
| PI: <a href="#"><u>QXN76442.1</u></a><br>Product:hypothetical protein | PI: <a href="#"><u>AGC35085.1</u></a><br>Product:hypothetical protein |
| PI: <a href="#"><u>QXN76443.1</u></a><br>Product:hypothetical protein | PI: <a href="#"><u>AGC35084.1</u></a><br>Product:hypothetical protein |
| PI: <a href="#"><u>QXN76444.1</u></a><br>Product:hypothetical protein | PI: <a href="#"><u>AGC35083.1</u></a><br>Product:hypothetical protein |
| PI: <a href="#"><u>QXN76445.1</u></a><br>Product:hypothetical protein | PI: <a href="#"><u>AGC35082.1</u></a><br>Product:hypothetical protein |
| PI: <a href="#"><u>QXN76446.1</u></a><br>Product:hypothetical protein | PI: <a href="#"><u>AGC35081.1</u></a><br>Product:hypothetical protein |
| PI: <a href="#"><u>QXN76447.1</u></a><br>Product:hypothetical protein | PI: <a href="#"><u>AGC35080.1</u></a><br>Product:hypothetical protein |
| PI: <a href="#"><u>QXN76448.1</u></a><br>Product:hypothetical protein | PI: <a href="#"><u>AGC35079.1</u></a><br>Product:hypothetical protein |
| PI: <a href="#"><u>QXN76449.1</u></a><br>Product:hypothetical protein | PI: <a href="#"><u>AGC35078.1</u></a><br>Product:hypothetical protein |
| PI: <a href="#"><u>QXN76450.1</u></a><br>Product:hypothetical protein | PI: <a href="#"><u>AGC35077.1</u></a><br>Product:hypothetical protein |
| PI: <a href="#"><u>QXN76451.1</u></a><br>Product:hypothetical protein | PI: <a href="#"><u>AGC35076.1</u></a><br>Product:hypothetical protein |
| PI: <a href="#"><u>QXN76452.1</u></a><br>Product:hypothetical protein | PI: <a href="#"><u>AGC35075.1</u></a><br>Product:hypothetical protein |
| PI: <a href="#"><u>QXN76453.1</u></a><br>Product:hypothetical protein | PI: <a href="#"><u>AGC35074.1</u></a><br>Product:hypothetical protein |
| PI: <a href="#"><u>QXN76454.1</u></a><br>Product:hypothetical protein | PI: <a href="#"><u>AGC35073.1</u></a><br>Product:hypothetical protein |
| PI: <a href="#"><u>QXN76455.1</u></a><br>Product:hypothetical protein | PI: <a href="#"><u>AGC35071.1</u></a><br>Product:hypothetical protein |
| PI: <a href="#"><u>QXN76456.1</u></a><br>Product:hypothetical protein | PI: <a href="#"><u>AGC35070.1</u></a><br>Product:hypothetical protein |
| PI: <a href="#"><u>QXN76458.1</u></a><br>Product:hypothetical protein | PI: <a href="#"><u>AGC35069.1</u></a><br>Product:hypothetical protein |
| PI: <a href="#"><u>QXN76459.1</u></a><br>Product:hypothetical protein | PI: <a href="#"><u>AGC35068.1</u></a><br>Product:hypothetical protein |
| PI: <a href="#"><u>QXN76460.1</u></a><br>Product:hypothetical protein | PI: <a href="#"><u>AGC35067.1</u></a><br>Product:hypothetical protein |
| PI: <a href="#"><u>QXN76462.1</u></a><br>Product:hypothetical protein | PI: <a href="#"><u>AGC35066.1</u></a><br>Product:hypothetical protein |
| PI: <a href="#"><u>QXN76463.1</u></a><br>Product:hypothetical protein | PI: <a href="#"><u>AGC35065.1</u></a><br>Product:hypothetical protein |
| PI: <a href="#"><u>QXN76465.1</u></a><br>Product:hypothetical protein | PI: <a href="#"><u>AGC35064.1</u></a><br>Product:hypothetical protein |
| PI: <a href="#"><u>QXN76466.1</u></a><br>Product:hypothetical protein | PI: <a href="#"><u>AGC35063.1</u></a><br>Product:hypothetical protein |
| PI: <a href="#"><u>QXN76467.1</u></a><br>Product:hypothetical protein | PI: <a href="#"><u>AGC35062.1</u></a><br>Product:hypothetical protein |

|                                                                       |                                                                       |
|-----------------------------------------------------------------------|-----------------------------------------------------------------------|
| PI: <a href="#"><u>QXN76468.1</u></a><br>Product:hypothetical protein | PI: <a href="#"><u>AGC35061.1</u></a><br>Product:hypothetical protein |
| PI: <a href="#"><u>QXN76469.1</u></a><br>Product:hypothetical protein | PI: <a href="#"><u>AGC35060.1</u></a><br>Product:hypothetical protein |
| PI: <a href="#"><u>QXN76470.1</u></a><br>Product:hypothetical protein | PI: <a href="#"><u>AGC35059.1</u></a><br>Product:hypothetical protein |
| PI: <a href="#"><u>QXN76471.1</u></a><br>Product:hypothetical protein | PI: <a href="#"><u>AGC35058.1</u></a><br>Product:hypothetical protein |
| PI: <a href="#"><u>QXN76472.1</u></a><br>Product:hypothetical protein | PI: <a href="#"><u>AGC35057.1</u></a><br>Product:hypothetical protein |
| PI: <a href="#"><u>QXN76473.1</u></a><br>Product:hypothetical protein | PI: <a href="#"><u>AGC35056.1</u></a><br>Product:hypothetical protein |
| PI: <a href="#"><u>QXN76474.1</u></a><br>Product:hypothetical protein | PI: <a href="#"><u>AGC35055.1</u></a><br>Product:hypothetical protein |
| PI: <a href="#"><u>QXN76475.1</u></a><br>Product:hypothetical protein | PI: <a href="#"><u>AGC35054.1</u></a><br>Product:hypothetical protein |
| PI: <a href="#"><u>QXN76476.1</u></a><br>Product:hypothetical protein | PI: <a href="#"><u>AGC35053.1</u></a><br>Product:hypothetical protein |
| PI: <a href="#"><u>QXN76477.1</u></a><br>Product:hypothetical protein | PI: <a href="#"><u>AGC35052.1</u></a><br>Product:hypothetical protein |
| PI: <a href="#"><u>QXN76478.1</u></a><br>Product:hypothetical protein | PI: <a href="#"><u>AGC35051.1</u></a><br>Product:hypothetical protein |
| PI: <a href="#"><u>QXN76479.1</u></a><br>Product:hypothetical protein | PI: <a href="#"><u>AGC35050.1</u></a><br>Product:hypothetical protein |
| PI: <a href="#"><u>QXN76480.1</u></a><br>Product:hypothetical protein | PI: <a href="#"><u>AGC35049.1</u></a><br>Product:hypothetical protein |
| PI: <a href="#"><u>QXN76481.1</u></a><br>Product:hypothetical protein | PI: <a href="#"><u>AGC35048.1</u></a><br>Product:hypothetical protein |
| PI: <a href="#"><u>QXN76482.1</u></a><br>Product:hypothetical protein | PI: <a href="#"><u>AGC35047.1</u></a><br>Product:hypothetical protein |
| PI: <a href="#"><u>QXN76483.1</u></a><br>Product:hypothetical protein | PI: <a href="#"><u>AGC35046.1</u></a><br>Product:hypothetical protein |
| PI: <a href="#"><u>QXN76484.1</u></a><br>Product:hypothetical protein | PI: <a href="#"><u>AGC35045.1</u></a><br>Product:hypothetical protein |
| PI: <a href="#"><u>QXN76485.1</u></a><br>Product:hypothetical protein | PI: <a href="#"><u>AGC35044.1</u></a><br>Product:hypothetical protein |
| PI: <a href="#"><u>QXN76486.1</u></a><br>Product:hypothetical protein | PI: <a href="#"><u>AGC35043.1</u></a><br>Product:hypothetical protein |
| PI: <a href="#"><u>QXN76487.1</u></a><br>Product:hypothetical protein | PI: <a href="#"><u>AGC35042.1</u></a><br>Product:hypothetical protein |
| PI: <a href="#"><u>QXN76488.1</u></a><br>Product:hypothetical protein | PI: <a href="#"><u>AGC35041.1</u></a><br>Product:hypothetical protein |
| PI: <a href="#"><u>QXN76489.1</u></a><br>Product:hypothetical protein | PI: <a href="#"><u>AGC35040.1</u></a><br>Product:hypothetical protein |
| PI: <a href="#"><u>QXN76490.1</u></a><br>Product:hypothetical protein | PI: <a href="#"><u>AGC35039.1</u></a><br>Product:hypothetical protein |
| PI: <a href="#"><u>QXN76491.1</u></a><br>Product:hypothetical protein | PI: <a href="#"><u>AGC35038.1</u></a><br>Product:hypothetical protein |

|                                                                              |                                                                                       |
|------------------------------------------------------------------------------|---------------------------------------------------------------------------------------|
| PI: <a href="#"><u>QXN76492.1</u></a><br>Product:hypothetical protein        | PI: <a href="#"><u>AGC35037.1</u></a><br>Product:hypothetical protein                 |
| PI: <a href="#"><u>QXN76493.1</u></a><br>Product:RNA polymerase sigma factor | PI: <a href="#"><u>AGC35036.1</u></a><br>Product:putative RNA polymerase sigma factor |
| PI: <a href="#"><u>QXN76494.1</u></a><br>Product:hypothetical protein        | PI: <a href="#"><u>AGC35035.1</u></a><br>Product:hypothetical protein                 |
| PI: <a href="#"><u>QXN76495.1</u></a><br>Product:hypothetical protein        | PI: <a href="#"><u>AGC35034.1</u></a><br>Product:hypothetical protein                 |
| PI: <a href="#"><u>QXN76496.1</u></a><br>Product:hypothetical protein        | PI: <a href="#"><u>AGC35033.1</u></a><br>Product:hypothetical protein                 |
| PI: <a href="#"><u>QXN76497.1</u></a><br>Product:hypothetical protein        | PI: <a href="#"><u>AGC35032.1</u></a><br>Product:hypothetical protein                 |
| PI: <a href="#"><u>QXN76498.1</u></a><br>Product:hypothetical protein        | PI: <a href="#"><u>AGC35031.1</u></a><br>Product:hypothetical protein                 |
| PI: <a href="#"><u>QXN76499.1</u></a><br>Product:hypothetical protein        | PI: <a href="#"><u>AGC35030.1</u></a><br>Product:hypothetical protein                 |
| PI: <a href="#"><u>QXN76500.1</u></a><br>Product:hypothetical protein        | PI: <a href="#"><u>AGC35029.1</u></a><br>Product:hypothetical protein                 |
| PI: <a href="#"><u>QXN76501.1</u></a><br>Product:hypothetical protein        | PI: <a href="#"><u>AGC35028.1</u></a><br>Product:hypothetical protein                 |
| PI: <a href="#"><u>QXN76502.1</u></a><br>Product:hypothetical protein        | PI: <a href="#"><u>AGC35027.1</u></a><br>Product:hypothetical protein                 |
| PI: <a href="#"><u>QXN76503.1</u></a><br>Product:hypothetical protein        | PI: <a href="#"><u>AGC35026.1</u></a><br>Product:hypothetical protein                 |
| PI: <a href="#"><u>QXN76504.1</u></a><br>Product:hypothetical protein        | PI: <a href="#"><u>AGC35025.1</u></a><br>Product:hypothetical protein                 |
| PI: <a href="#"><u>QXN76505.1</u></a><br>Product:hypothetical protein        | PI: <a href="#"><u>AGC35024.1</u></a><br>Product:hypothetical protein                 |
| PI: <a href="#"><u>QXN76506.1</u></a><br>Product:hypothetical protein        | PI: <a href="#"><u>AGC35023.1</u></a><br>Product:hypothetical protein                 |
| PI: <a href="#"><u>QXN76507.1</u></a><br>Product:hypothetical protein        | PI: <a href="#"><u>AGC35022.1</u></a><br>Product:hypothetical protein                 |
| PI: <a href="#"><u>QXN76508.1</u></a><br>Product:hypothetical protein        | PI: <a href="#"><u>AGC35021.1</u></a><br>Product:hypothetical protein                 |
| PI: <a href="#"><u>QXN76509.1</u></a><br>Product:hypothetical protein        | PI: <a href="#"><u>AGC35020.1</u></a><br>Product:hypothetical protein                 |
| PI: <a href="#"><u>QXN76510.1</u></a><br>Product:hypothetical protein        | PI: <a href="#"><u>AGC35019.1</u></a><br>Product:hypothetical protein                 |
| PI: <a href="#"><u>QXN76511.1</u></a><br>Product:hypothetical protein        | PI: <a href="#"><u>AGC35018.1</u></a><br>Product:hypothetical protein                 |
| PI: <a href="#"><u>QXN76513.1</u></a><br>Product:hypothetical protein        | PI: <a href="#"><u>AGC35017.1</u></a><br>Product:hypothetical protein                 |
| PI: <a href="#"><u>QXN76514.1</u></a><br>Product:hypothetical protein        | PI: <a href="#"><u>AGC35016.1</u></a><br>Product:hypothetical protein                 |
| PI: <a href="#"><u>QXN76515.1</u></a><br>Product:hypothetical protein        | PI: <a href="#"><u>AGC35015.1</u></a><br>Product:hypothetical protein                 |
| PI: <a href="#"><u>QXN76516.1</u></a><br>Product:hypothetical protein        | PI: <a href="#"><u>AGC35014.1</u></a><br>Product:hypothetical protein                 |

|                                                       |                                                       |
|-------------------------------------------------------|-------------------------------------------------------|
| PI: <u>QXN76517.1</u><br>Product:hypothetical protein | PI: <u>AGC35013.1</u><br>Product:hypothetical protein |
| PI: <u>QXN76518.1</u><br>Product:hypothetical protein | PI: <u>AGC35012.1</u><br>Product:hypothetical protein |
| PI: <u>QXN76519.1</u><br>Product:hypothetical protein | PI: <u>AGC35011.1</u><br>Product:hypothetical protein |
| PI: <u>QXN76520.1</u><br>Product:hypothetical protein | PI: <u>AGC35010.1</u><br>Product:hypothetical protein |
| PI: <u>QXN76521.1</u><br>Product:hypothetical protein | PI: <u>AGC35009.1</u><br>Product:hypothetical protein |
| PI: <u>QXN76522.1</u><br>Product:hypothetical protein | PI: <u>AGC35008.1</u><br>Product:hypothetical protein |
| PI: <u>QXN76524.1</u><br>Product:hypothetical protein | PI: <u>AGC35007.1</u><br>Product:hypothetical protein |
| PI: <u>QXN76525.1</u><br>Product:hypothetical protein | PI: <u>AGC35006.1</u><br>Product:hypothetical protein |
| PI: <u>QXN76526.1</u><br>Product:hypothetical protein | PI: <u>AGC35005.1</u><br>Product:hypothetical protein |
| PI: <u>QXN76527.1</u><br>Product:hypothetical protein | PI: <u>AGC35004.1</u><br>Product:hypothetical protein |
| PI: <u>QXN76530.1</u><br>Product:hypothetical protein | PI: <u>AGC35003.1</u><br>Product:hypothetical protein |
| PI: <u>QXN76531.1</u><br>Product:hypothetical protein | PI: <u>AGC35002.1</u><br>Product:hypothetical protein |
| PI: <u>QXN76532.1</u><br>Product:hypothetical protein | PI: <u>AGC35001.1</u><br>Product:hypothetical protein |
| PI: <u>QXN76533.1</u><br>Product:hypothetical protein | PI: <u>AGC35000.1</u><br>Product:hypothetical protein |
| PI: <u>QXN76534.1</u><br>Product:hypothetical protein | PI: <u>AGC34998.1</u><br>Product:hypothetical protein |
| PI: <u>QXN76535.1</u><br>Product:hypothetical protein | PI: <u>AGC34997.1</u><br>Product:hypothetical protein |
| PI: <u>QXN76536.1</u><br>Product:hypothetical protein | PI: <u>AGC34996.1</u><br>Product:hypothetical protein |
| PI: <u>QXN76538.1</u><br>Product:hypothetical protein | PI: <u>AGC34995.1</u><br>Product:hypothetical protein |
| PI: <u>QXN76539.1</u><br>Product:hypothetical protein | PI: <u>AGC34994.1</u><br>Product:hypothetical protein |
| PI: <u>QXN76541.1</u><br>Product:hypothetical protein | PI: <u>AGC34993.1</u><br>Product:hypothetical protein |
| PI: <u>QXN76542.1</u><br>Product:hypothetical protein | PI: <u>AGC34992.1</u><br>Product:hypothetical protein |
| PI: <u>QXN76544.1</u><br>Product:hypothetical protein | PI: <u>AGC34991.1</u><br>Product:hypothetical protein |
| PI: <u>QXN76545.1</u><br>Product:hypothetical protein | PI: <u>AGC34990.1</u><br>Product:hypothetical protein |

|                                                                                            |                                                                                                |
|--------------------------------------------------------------------------------------------|------------------------------------------------------------------------------------------------|
| PI: <a href="#"><u>QXN76547.1</u></a><br>Product:endonuclease                              | PI: <a href="#"><u>AGC34989.1</u></a><br>Product:endonuclease V N-glycosylase UV repair enzyme |
| PI: <a href="#"><u>QXN76548.1</u></a><br>Product:hypothetical protein                      | PI: <a href="#"><u>AGC34987.1</u></a><br>Product:hypothetical protein                          |
| PI: <a href="#"><u>QXN76551.1</u></a><br>Product:hypothetical protein                      | PI: <a href="#"><u>AGC34984.1</u></a><br>Product:hypothetical protein                          |
| PI: <a href="#"><u>QXN76552.1</u></a><br>Product:hypothetical protein                      | PI: <a href="#"><u>AGC34983.1</u></a><br>Product:hypothetical protein                          |
| PI: <a href="#"><u>QXN76553.1</u></a><br>Product:hypothetical protein                      | PI: <a href="#"><u>AGC34982.1</u></a><br>Product:hypothetical protein                          |
| PI: <a href="#"><u>QXN76554.1</u></a><br>Product:hypothetical protein                      | PI: <a href="#"><u>AGC34981.1</u></a><br>Product:hypothetical protein                          |
| PI: <a href="#"><u>QXN76555.1</u></a><br>Product:hypothetical protein                      | PI: <a href="#"><u>AGC34980.1</u></a><br>Product:hypothetical protein                          |
| PI: <a href="#"><u>QXN76556.1</u></a><br>Product:hypothetical protein                      | PI: <a href="#"><u>AGC34979.1</u></a><br>Product:hypothetical protein                          |
| PI: <a href="#"><u>QXN76558.1</u></a><br>Product:hypothetical protein                      | PI: <a href="#"><u>AGC34978.1</u></a><br>Product:hypothetical protein                          |
| PI: <a href="#"><u>QXN76560.1</u></a><br>Product:hypothetical protein                      | PI: <a href="#"><u>AGC34977.1</u></a><br>Product:hypothetical protein                          |
| PI: <a href="#"><u>QXN76563.1</u></a><br>Product:hypothetical protein                      | PI: <a href="#"><u>AGC34968.1</u></a><br>Product:hypothetical protein                          |
| PI: <a href="#"><u>QXN76567.1</u></a><br>Product:hypothetical protein                      | PI: <a href="#"><u>AGC34970.1</u></a><br>Product:hypothetical protein                          |
| PI: <a href="#"><u>QXN76568.1</u></a><br>Product:regulator of chromosome condensation-like | PI: <a href="#"><u>AGC34972.1</u></a><br>Product:regulator of chromosome condensation-like     |
| PI: <a href="#"><u>QXN76569.1</u></a><br>Product:hypothetical protein                      | PI: <a href="#"><u>AGC34967.1</u></a><br>Product:hypothetical protein                          |
| PI: <a href="#"><u>QXN76572.1</u></a><br>Product:hypothetical protein                      | PI: <a href="#"><u>AGC34966.1</u></a><br>Product:regulator of chromosome condensation<br>RCC1  |
| PI: <a href="#"><u>QXN76574.1</u></a><br>Product:regulator of chromosome condensation      | PI: <a href="#"><u>AGC34969.1</u></a><br>Product:regulator of chromosome condensation<br>RCC1  |
| PI: <a href="#"><u>QXN76580.1</u></a><br>Product:hypothetical protein                      | PI: <a href="#"><u>AGC34964.1</u></a><br>Product:hypothetical protein                          |
| PI: <a href="#"><u>QXN76583.1</u></a><br>Product:hypothetical protein                      | PI: <a href="#"><u>AGC34962.1</u></a><br>Product:hypothetical protein                          |
| PI: <a href="#"><u>QXN76584.1</u></a><br>Product:hypothetical protein                      | PI: <a href="#"><u>AGC34961.1</u></a><br>Product:hypothetical protein                          |
| PI: <a href="#"><u>QXN76587.1</u></a><br>Product:hypothetical protein                      | PI: <a href="#"><u>AGC34960.1</u></a><br>Product:hypothetical protein                          |
| PI: <a href="#"><u>QXN76588.1</u></a><br>Product:hypothetical protein                      | PI: <a href="#"><u>AGC34959.1</u></a><br>Product:hypothetical protein                          |
| PI: <a href="#"><u>QXN76589.1</u></a><br>Product:hypothetical protein                      | PI: <a href="#"><u>AGC34958.1</u></a><br>Product:hypothetical protein                          |
| PI: <a href="#"><u>QXN76590.1</u></a><br>Product:hypothetical protein                      | PI: <a href="#"><u>AGC34957.1</u></a><br>Product:hypothetical protein                          |

|                                                                       |                                                                       |
|-----------------------------------------------------------------------|-----------------------------------------------------------------------|
| PI: <a href="#"><u>QXN76591.1</u></a><br>Product:hypothetical protein | PI: <a href="#"><u>AGC34956.1</u></a><br>Product:hypothetical protein |
| PI: <a href="#"><u>QXN76592.1</u></a><br>Product:hypothetical protein | PI: <a href="#"><u>AGC34955.1</u></a><br>Product:hypothetical protein |
| PI: <a href="#"><u>QXN76593.1</u></a><br>Product:hypothetical protein | PI: <a href="#"><u>AGC34954.1</u></a><br>Product:hypothetical protein |
| PI: <a href="#"><u>QXN76594.1</u></a><br>Product:hypothetical protein | PI: <a href="#"><u>AGC34953.1</u></a><br>Product:hypothetical protein |
| PI: <a href="#"><u>QXN76595.1</u></a><br>Product:hypothetical protein | PI: <a href="#"><u>AGC34952.1</u></a><br>Product:hypothetical protein |
| PI: <a href="#"><u>QXN76596.1</u></a><br>Product:hypothetical protein | PI: <a href="#"><u>AGC34949.1</u></a><br>Product:hypothetical protein |
| PI: <a href="#"><u>QXN76598.1</u></a><br>Product:hypothetical protein | PI: <a href="#"><u>AGC34948.1</u></a><br>Product:hypothetical protein |
| PI: <a href="#"><u>QXN76600.1</u></a><br>Product:hypothetical protein | PI: <a href="#"><u>AGC34947.1</u></a><br>Product:hypothetical protein |
| PI: <a href="#"><u>QXN76601.1</u></a><br>Product:hypothetical protein | PI: <a href="#"><u>AGC34946.1</u></a><br>Product:hypothetical protein |
| PI: <a href="#"><u>QXN76603.1</u></a><br>Product:hypothetical protein | PI: <a href="#"><u>AGC34945.1</u></a><br>Product:hypothetical protein |
| PI: <a href="#"><u>QXN76604.1</u></a><br>Product:hypothetical protein | PI: <a href="#"><u>AGC34944.1</u></a><br>Product:hypothetical protein |
| PI: <a href="#"><u>QXN76605.1</u></a><br>Product:hypothetical protein | PI: <a href="#"><u>AGC34943.1</u></a><br>Product:hypothetical protein |
| PI: <a href="#"><u>QXN76606.1</u></a><br>Product:hypothetical protein | PI: <a href="#"><u>AGC34942.1</u></a><br>Product:hypothetical protein |
| PI: <a href="#"><u>QXN76607.1</u></a><br>Product:hypothetical protein | PI: <a href="#"><u>AGC34941.1</u></a><br>Product:hypothetical protein |
| PI: <a href="#"><u>QXN76609.1</u></a><br>Product:hypothetical protein | PI: <a href="#"><u>AGC34939.1</u></a><br>Product:hypothetical protein |
| PI: <a href="#"><u>QXN76610.1</u></a><br>Product:hypothetical protein | PI: <a href="#"><u>AGC34938.1</u></a><br>Product:hypothetical protein |
| PI: <a href="#"><u>QXN76611.1</u></a><br>Product:hypothetical protein | PI: <a href="#"><u>AGC34937.1</u></a><br>Product:hypothetical protein |
| PI: <a href="#"><u>QXN76613.1</u></a><br>Product:hypothetical protein | PI: <a href="#"><u>AGC34936.1</u></a><br>Product:hypothetical protein |
| PI: <a href="#"><u>QXN76614.1</u></a><br>Product:hypothetical protein | PI: <a href="#"><u>AGC34935.1</u></a><br>Product:hypothetical protein |
| PI: <a href="#"><u>QXN76615.1</u></a><br>Product:hypothetical protein | PI: <a href="#"><u>AGC34934.1</u></a><br>Product:hypothetical protein |
| PI: <a href="#"><u>QXN76616.1</u></a><br>Product:hypothetical protein | PI: <a href="#"><u>AGC34933.1</u></a><br>Product:hypothetical protein |
| PI: <a href="#"><u>QXN76618.1</u></a><br>Product:hypothetical protein | PI: <a href="#"><u>AGC34932.1</u></a><br>Product:hypothetical protein |
| PI: <a href="#"><u>QXN76619.1</u></a><br>Product:hypothetical protein | PI: <a href="#"><u>AGC34931.1</u></a><br>Product:hypothetical protein |
| PI: <a href="#"><u>QXN76620.1</u></a><br>Product:hypothetical protein | PI: <a href="#"><u>AGC34930.1</u></a><br>Product:hypothetical protein |



|                                                       |                                                       |
|-------------------------------------------------------|-------------------------------------------------------|
| PI: <u>QXN76622.1</u><br>Product:hypothetical protein | PI: <u>AGC34929.1</u><br>Product:hypothetical protein |
| PI: <u>QXN76623.1</u><br>Product:hypothetical protein | PI: <u>AGC34928.1</u><br>Product:hypothetical protein |
| PI: <u>QXN76624.1</u><br>Product:hypothetical protein | PI: <u>AGC34926.1</u><br>Product:hypothetical protein |
| PI: <u>QXN76625.1</u><br>Product:hypothetical protein | PI: <u>AGC34925.1</u><br>Product:hypothetical protein |
| PI: <u>QXN76626.1</u><br>Product:hypothetical protein | PI: <u>AGC34924.1</u><br>Product:hypothetical protein |
| PI: <u>QXN76627.1</u><br>Product:hypothetical protein | PI: <u>AGC34923.1</u><br>Product:hypothetical protein |
| PI: <u>QXN76630.1</u><br>Product:hypothetical protein | PI: <u>AGC34922.1</u><br>Product:hypothetical protein |
| PI: <u>QXN76631.1</u><br>Product:hypothetical protein | PI: <u>AGC34921.1</u><br>Product:hypothetical protein |
| PI: <u>QXN76632.1</u><br>Product:hypothetical protein | PI: <u>AGC34920.1</u><br>Product:hypothetical protein |
| PI: <u>QXN76633.1</u><br>Product:hypothetical protein | PI: <u>AGC34919.1</u><br>Product:hypothetical protein |
| PI: <u>QXN76634.1</u><br>Product:hypothetical protein | PI: <u>AGC34918.1</u><br>Product:hypothetical protein |
| PI: <u>QXN76635.1</u><br>Product:hypothetical protein | PI: <u>AGC34917.1</u><br>Product:hypothetical protein |
| PI: <u>QXN76636.1</u><br>Product:hypothetical protein | PI: <u>AGC34916.1</u><br>Product:hypothetical protein |
| PI: <u>QXN76638.1</u><br>Product:hypothetical protein | PI: <u>AGC34915.1</u><br>Product:hypothetical protein |
| PI: <u>QXN76639.1</u><br>Product:hypothetical protein | PI: <u>AGC34914.1</u><br>Product:hypothetical protein |
| PI: <u>QXN76640.1</u><br>Product:hypothetical protein | PI: <u>AGC34913.1</u><br>Product:hypothetical protein |
| PI: <u>QXN76641.1</u><br>Product:hypothetical protein | PI: <u>AGC34912.1</u><br>Product:hypothetical protein |
