# Supplementary material for: Characterization and Comparative Genomic Analysis of Three Virulent E. coli Bacteriophages with the Potential to Reduce Antibiotic-Resistant Bacteria in the Environment
Source: MDPI journal article supplement (doi:10.3390/ijms24065696), 2023-03-16
Supplement: s1 [file s1]

**Table S1.** The overview of general features of bacteriophages genomes.

| Phage | GeneBank Accession | Host strain        | Genome length (bp) | G+C content (%) | ORFs | tRNA genes | Lifestyle | Taxonomy             | Core genes shared with representative of genera |
|-------|--------------------|--------------------|--------------------|-----------------|------|------------|-----------|----------------------|-------------------------------------------------|
| BF9   | MW822006           | <i>E. coli</i> B19 | 44,963             | 54,5            | 58   | 0          | lytic     | <i>Dhillonvirus</i>  | 47<br>HK578<br>(JQ086375)                       |
| BF15  | MW822007           | <i>E. coli</i> B39 | 167,801            | 35,4            | 267  | 8          | lytic     | <i>Tequatrovirus</i> | 241<br>T4<br>(NC_000866)                        |
| BF17  | MW822008           | <i>E. coli</i> B73 | 383,493            | 35,4            | 660  | 6          | lytic     | <i>Asteriusvirus</i> | 569<br>PBECO4<br>(KC295538)                     |
