# Supplementary material for: Characterization and Comparative Genomic Analysis of Three Virulent E. coli Bacteriophages with the Potential to Reduce Antibiotic-Resistant Bacteria in the Environment
Source: Int J Mol Sci. 2023 Mar 16;24(6):5696. doi: 10.3390/ijms24065696 (PMC10059673; doi:10.3390/ijms24065696)
Supplement: Supplementary file 1 [file ijms-24-05696-s001.zip]

Archive with 4 entries (4 files):
- Supplementary Figure S1.pdf
- Supplementary Table S1.pdf
- Supplementary Table S2.xlsx
- Supplementary Table S3.pdf
