# Supplementary material for: Characterization and Comparative Genomic Analysis of Three Virulent E. coli Bacteriophages with the Potential to Reduce Antibiotic-Resistant Bacteria in the Environment
Source: Int J Mol Sci. 2023 Mar 16;24(6):5696. doi: 10.3390/ijms24065696 (PMC10059673; doi:10.3390/ijms24065696)
Supplement: Supplementary file 1 [file ijms-24-05696-s001.zip › Supplementary Table S2.xlsx]

## Sheet: BF9
ORF No.	Strand	Start	Stop	Length (bp	Predicted protein [best-matched organism]	Functional group	Query coverage (%)	Identity (%)	Accession
1	-	<3	1637	1635	putative tail tip protein [Escherichia virus JL1]	Structure and packaging/ morphogenesis	0.98	70.47%	YP_006990422.1
2	+	1691	1912	222	putative phage lipoprotein [Escherichia virus JL1]	Structure and packaging/ morphogenesis	0.93	93.15%	YP_006990423.1
3	+	1915	2880	966	hypothetical protein [Escherichia phage vB_EcoS_WF5505]	Unknown function	1	97.51%	QBQ80536.1
4	-	2908	6354	3447	putative tail fiber tip protein [Escherichia phage EK99P-1]	Structure and packaging/ morphogenesis	1	97.74%	YP_009055302.1
5	-	6351	6968	618	phage tail assembly protein [Escherichia phage Gluttony_ev152]	Structure and packaging/ morphogenesis	1	99.51%	VUF54077.1
6	-	6959	7699	741	minor tail protein [Escherichia phage jat]	Structure and packaging/ morphogenesis	1	99.19%	QHR76426.1
7	-	7702	8490	789	putative minor tail protein L [Escherichia phage vB_EcoS_PTXU06]	Structure and packaging/ morphogenesis	1	99.62%	QBQ80468.1
8	-	8487	9125	639	phage minor tail protein [Escherichia phage slur05]	Structure and packaging/ morphogenesis	1	99.53%	YP_009208103.1
9	-	9122	11764	2643	phage tail length tape-measure protein 1 [Escherichia phage Gluttony_ev152]	Structure and packaging/ morphogenesis	1	97.95%	VUF54014.1
10	-	12149	12265	117	hypothetical protein [Escherichia phage vB_EcoS_PTXU06]	Unknown function	1	97.37%	QBQ80464.1
11	-	12463	12825	363	hypothetical protein [Escherichia phage jat]	Unknown function	1	98.33%	QHR76430.1
12	-	12895	13620	726	putative major tail protein [Escherichia phage CEC_Kaz_2018]	Structure and packaging/ morphogenesis	1	97.51%	QCO71625.1
13	-	13682	14104	423	hypothetical protein [Escherichia phage EK99P-1]	Unknown function	1	97.86%	YP_009055293.1
14	-	14104	14697	594	putative tail protein [Escherichia phage EK99P-1]	Structure and packaging/ morphogenesis	1	98.48%	YP_009055292.1
15	-	14699	15052	354	hypothetical protein [Escherichia phage EK99P-1]	Unknown function	1	98.29%	YP_009055291.1
16	-	15157	15699	543	hypothetical protein [Escherichia phage CEC_Kaz_2018]	Unknown function	0.97	93.18%	QCO71630.1
17	-	15716	16810	1095	major head protein [Escherichia phage CEC_Kaz_2018]	Structure and packaging/ morphogenesis	1	98.91%	QCO71631.1
18	-	16908	17612	801	hypothetical protein [Escherichia phage EK99P-1]	Unknown function	1	100.00%	YP_009055287.1
19	+	17762	18526	765	Nmad5 domain-containing protein [Escherichia phage Envy]	Additional function	1	95.67%	YP_009288161.1
20	-	18652	18981	330	hypothetical protein [Escherichia phage CEC_Kaz_2018]	Unknown function	1	94.50%	QCO71635.1
21	-	18974	20077	1104	head morphogenesis protein [Escherichia phage CEC_Kaz_2018]	Structure and packaging/ morphogenesis	1	98.64%	QCO71636.1
22	-	20061	21581	1521	structural protein [Escherichia phage jat]	Structure and packaging/ morphogenesis	1	99.41%	QHR76384.1
23	-	21592	22977	1386	terminase large subunit [Escherichia phage CEC_Kaz_2018]	Structure and packaging/ morphogenesis	1	99.35%	QCO71638.1
24	-	22977	23549	573	putative terminase small subunit [Escherichia phage CEC_Kaz_2018]	Structure and packaging/ morphogenesis	1	99.47%	QCO71639.1
25	-	23645	23857	213	hypothetical protein [Escherichia phage mckay]	Unknown function	0.98	91.30%	QHR73492.1
26	-	23854	24996	1143	HTH luxR-type domain-containing protein [Escherichia phage vB_EcoS_PTXU06]	Additional function	1	97.37%	QBQ80447.1
27	-	25234	25401	168	hypothetical protein [Escherichia virus JL1]	Unknown function	1		YP_006990392.1
28	-	25418	25909	492	phage lysozyme [Escherichia phage slur05]	Host lysis	1	98.77%	YP_009208123.1
29	-	25896	26141	246	hypothetical protein [Escherichia phage Envy]	Unknown function	1	97.53%	YP_009288171.1
30	-	26138	26428	291	hypothetical protein [Escherichia phage Envy]	Unknown function	1	98.96%	YP_009288172.1
31	-	26481	26768	288	hypothetical protein [Escherichia phage Envy]	Unknown function	1	97.89%	YP_009288173.1
32	-	27349	27501	153	hypothetical protein [Escherichia phage vB_EcoS_011D5]	Unknown function	1	88.00%	QMP82793.1
33	-	27777	28067	291	hypothetical protein [Escherichia phage EK99P-1]	Unknown function	1	94.79%	YP_009055329.1
34	-	28290	28544	255	hypothetical protein [Escherichia phage B2]	Unknown function	1	83.33%	AUG84622.1
35	-	28602	30866	2265	phage replicative DNA helicase [Escherichia phage Gluttony_ev152]	DNA replication, transcription, translation and nucleotide metabolism	1	98.81%	VUF53451.1
36	-	30877	31206	330	hypothetical protein [Escherichia phage slur05]	Unknown function	1	99.08%	YP_009208132.1
37	+	31609	32127	519	hypothetical protein [Escherichia phage Gluttony_ev152]	Unknown function	1	97.67%	VUF53406.1
38	+	32176	32427	252	hypothetical protein [Escherichia phage CEC_Kaz_2018]	Unknown function	1	98.80%	QCO71657.1
39	+	32428	32616	189	phage protein [Escherichia phage Gluttony_ev152]	Unknown function	1	90.32%	VUF53352.1
40	+	32616	34046	1431	hypothetical protein [Shigella phage EP23]	Unknown function	1	98.32%	YP_004957476.1
41	+	34039	34281	243	hypothetical protein [Escherichia phage mckay]	Unknown function	1	96.25%	QHR73449.1
42	+	34357	35100	744	hypothetical protein [Escherichia virus JL1]	Unknown function	1	97.57%	YP_006990409.1
43	+	35159	35329	171	hypothetical protein [Escherichia phage slur05]	Unknown function	1	98.21%	YP_009208140.1
44	+	35326	37617	2292	putative DNA polymerase [Escherichia phage vB_EcoS_PTXU06]	DNA replication, transcription, translation and nucleotide metabolism	1	98.69%	QBQ80490.1
45	+	37666	38268	525	hypothetical protein [Escherichia phage mckay]	Unknown function	1	94.83%	QHR73453.1
46	+	38265	38543	279	VRR-NUC domain-containing protein [Escherichia phage B2]	Additional function	1	96.74%	AUG84567.1
47	+	38584	38757	174	hypothetical protein [Escherichia phage vB_EcoS_PNS1]	Unknown function	1	98.25%	AZF89803.1
48	+	38795	39019	225	hypothetical protein [Escherichia phage B2]	Unknown function	1	98.65%	AUG84569.1
49	+	39024	40448	1425	DNA helicase [Escherichia phage Gluttony]	DNA replication, transcription, translation and nucleotide metabolism	1	98.52%	YP_009291425.1
50	+	40445	41140	696	hypothetical [Escherichia virus JL1]	Unknown function	1	99.57%	YP_006990415.1
51	+	41137	41460	324	putative HNH endonuclease [Escherichia virus JL1]	DNA replication, transcription, translation and nucleotide metabolism	1	98.13%	YP_006990416.1
52	+	41542	41784	243	hypothetical protein [Escherichia phage mckay]	Unknown function	1	97.50%	QHR73460.1
53	+	41785	42243	459	hypothetical protein [Escherichia virus SSL2009a]	Unknown function	1	88.16%	YP_008550159.1
54	+	42230	42715	486	DNA N-6-adenine methyltransferase [Escherichia phage vb_EcoS_bov11C2]	DNA replication, transcription, translation and nucleotide metabolism	1	98.14%	QNR53551.1
55	+	42696	42920	225	hypothetical protein [Escherichia phage welsh]	Unknown function	1	83.78%	QHR68090.1
56	+	42917	43387	471	hypothetical protein [Escherichia phage Gluttony_ev152]	Unknown function	1	99.36%	VUF53025.1
57	+	43451	43900	450	hypothetical protein [Escherichia phage vB_EcoS_PTXU06]	Unknown function	1	85.33%	QBQ80477.1
58	+	43943	44518	576	hypothetical protein [Escherichia phage mckay]	Unknown function	1	97.38%	QHR73466.1

## Sheet: BF15
ORF No.	Strand	Start	Stop	Length (bp	Predicted protein [best-matched organism]	Functional group	Query coverage (%)	Identity (%)	Accession
1	-	13	696	684	exonuclease A [Enterobacteria phage vB_EcoM_IME340]	DNA replication, transcription, translation and nucleotide metabolism	1	99.56%	AWD91918.1
2	-	696	938	243	exonuclease Escherichia phage T4_ev240]	DNA replication, transcription, translation and nucleotide metabolism	1	97.50%	VUF54691.1
3	-	931	1176	246	exonuclease Enterobacteria phage vB_EcoM_IME340	DNA replication, transcription, translation and nucleotide metabolism	1	97.53%	AWD91916.1
4	-	1198	2517	1320	DNA helicase [Escherichia phage PP01]	DNA replication, transcription, translation and nucleotide metabolism	1	99.54%	BBC14352.1
5	-	2514	2825	312	hypothetical protein [Escherichia phage vB_EcoM-G28]	Unknown function	1	99.03%	AVH85851.1
6	-	2827	3573	747	hypothetical protein [Escherichia phage vB_EcoM_SP1]	Unknown function	1	99.19%	QLF80817.1
7	-	3689	4291	603	NAD--protein ADP-ribosyltransferase modA [Enterobacteria phage vB_EcoM_IME339]	DNA replication, transcription, translation and nucleotide metabolism	1	99.50%	AWD91651.1
8	-	4288	4911	624	NAD--protein ADP-ribosyltransferase modB [Escherichia phage EcNP1]	DNA replication, transcription, translation and nucleotide metabolism	1	99.52%	QCQ57265.1
9	-	4979	5161	183	hypothetical protein [Escherichia phage vB_vPM_PD112]	Unknown function	1	98.33%	AYD85287.1
10	-	5170	5640	471	hypothetical protein [Escherichia phage UFV-AREG1]	Unknown function	1	95.51%	YP_009281362.1
11	-	5633	5797	165	hypothetical protein [Escherichia phage vB_EcoM_R5505]	Unknown function	1	94.44%	QBQ79630.1
12	-	5794	5997	204	hypothetical protein [Escherichia phage vB_EcoM-G28]	Unknown function	1	98.51%	AVH85858.1
13	-	5972	6457	486	putative transcription modulator under heat shock [Escherichia phage HY01]	DNA replication, transcription, translation and nucleotide metabolism	1	95.03%	YP_009148475.1
14	-	6466	6807	342	hypothetical protein [Escherichia phage ECO4]	Unknown function	1	99.12%	ASZ77155.1
15	-	6807	7013	207	hypothetical protein [Escherichia phage vB_EcoM_DalCa]	Unknown function	1	100.00%	AYP69936.1
16	-	7112	7357	246	Soc small outer capsid protein [Escherichia phage vB_EcoM-fFiEco06]	Structure and packaging/ morphogenesis	1	100.00%	AUV60891.1
17	-	7426	7944	519	putative dCTP pyrophosphatase [Escherichia phage vB_EcoM_G2540-3]	DNA replication, transcription, translation and nucleotide metabolism	1	95.93%	QBO65441.1
18	-	8005	8784	780	site-specific DNA-methyltransferase (adenine-specific) [Escherichia phage vB_EcoM_OE5505]	DNA replication, transcription, translation and nucleotide metabolism	1	99.61%	QBQ79356.1
19	-	8784	9344	561	hypothetical protein [Escherichia phage vB_EcoM-G28]	Unknown function	1	98.39%	AVH85865.1
20	+	9435	9635	201	hypothetical protein [Enterobacteria phage vB_EcoM_IME339]	Unknown function	1	98.48%	AWD91638.1
21	-	9632	10660	1029	DNA primase [Escherichia phage EcNP1]	DNA replication, transcription, translation and nucleotide metabolism	1	98.83%	QCQ57276.1
22	-	10663	10827	165	hypothetical protein [Escherichia virus T4]	Unknown function	1	98.15%	NP_049649.1
23	-	10829	11185	357	hypothetical protein [Escherichia phage YUEEL01]	Unknown function	0.99	100.00%	APU02665.1
24	-	11194	11493	300	sp spackle periplasmic protein [Escherichia virus T4]	Structure and packaging/ morphogenesis	0.97	98.97%	NP_049651.1
25	-	11554	11811	258	hypothetical protein [Escherichia phage ECML-134]	Unknown function	1	100.00%	YP_009102512.1
26	-	11813	11995	183	hypothetical protein [Escherichia phage vB_EcoM_G2133]	Unknown function	1	98.33%	QBO60779.1
27	-	12054	13481	1428	DNA primase-helicase subunit [Escherichia phage vB_EcoM-Sa45lw]	DNA replication, transcription, translation and nucleotide metabolism	1	99.56%	QDF15065.1
28	-	13491	13835	345	head vertex assembly chaperone [Escherichia phage ime09]	Structure and packaging/ morphogenesis	1	99.12%	YP_007004425.1
29	-	13828	15009	1182	putative recombinase [Escherichia phage vB_EcoM_G8]	DNA replication, transcription, translation and nucleotide metabolism	1	99.49%	QBQ79926.1
30	-	15087	15929	843	glucosyl transferase [Escherichia phage CF2]	Restriction-modification system	1	98.93%	YP_009965541.1
31	-	15926	16567	642	hypothetical protein [Escherichia phage PE37]	Unknown function	1	99.06%	ANH49820.1
32	-	16558	17298	741	putative thymidylate synthase [Escherichia phage HY03]	DNA replication, transcription, translation and nucleotide metabolism	1	98.37%	YP_009284143.1
33	-	17452	17703	252	immunity to superinfection membrane protein [Escherichia phage RB3]	Structure and packaging/ morphogenesis	1	98.80%	YP_009098431.1
34	-	17711	18091	381	immunity protein [Enterobacteria phage vB_EcoM_IME340]	Structure and packaging/ morphogenesis	1	97.62%	AWD91887.1
35	-	18273	20969	2697	DNA polymerase [Enterobacteria phage vB_EcoM_IME340]	DNA replication, transcription, translation and nucleotide metabolism	1	100.00%	AWD91886.1
36	-	21047	21415	369	putative translation repressor protein [Escherichia phage vB_EcoM_G2133]	DNA replication, transcription, translation and nucleotide metabolism	1	98.36%	QBO60790.1
37	-	21417	21980	564	putative clamp loader small subunit [Escherichia phage D5505]	DNA replication, transcription, translation and nucleotide metabolism	1	99.47%	QBO61061.1
38	-	21982	22941	960	putative clamp loader subunit [Escherichia phage HY01]	DNA replication, transcription, translation and nucleotide metabolism	1	99.69%	YP_009148499.1
39	-	22993	23679	687	DNA polymerase clamp [Escherichia virus T4]	DNA replication, transcription, translation and nucleotide metabolism	1	99.12%	NP_049666.1
40	-	23735	24124	390	RNA polymerase binding protein [Escherichia phage vB_EcoM_SP1]	DNA replication, transcription, translation and nucleotide metabolism	1	98.45%	QLF80884.1
41	-	24134	24322	189	hypothetical protein [Escherichia phage ime09]Hypot	Unknown function	1	98.39%	YP_007004438.1
42	-	24378	26060	1683	recombination endonuclease subunit [Escherichia phage PEC04]	DNA replication, transcription, translation and nucleotide metabolism	1	99.46%	AKN44561.1
43	-	26057	26263	207	hypothetical protein [Enterobacteria phage vB_EcoM_IME339]	Unknown function	1	95.59%	AWD91616.1
44	-	26244	26507	264	hypothetical protein [Enterobacteria phage vB_EcoM_IME340]	Unknown function	1	98.85%	AWD91877.1
45	-	26504	27523	1020	putative recombination endonuclease subunit [Escherichia phage HY01]	DNA replication, transcription, translation and nucleotide metabolism	1	99.71%	YP_009148506.1
46	-	27520	27660	141	predicted membrane protein [Escherichia virus T4]	Structure and packaging/ morphogenesis	1	97.83%	NP_813808.1
47	-	27700	28902	1203	putative alpha-glucosyl-transferase [Escherichia phage vB_EcoM_IME537]	Restriction-modification system	1	99.75%	QIW91410.1
48	-	28969	29142	174	hypothetical protein [Escherichia phage ime09]	Unknown function	1	100.00%	YP_007004444.1
49	-	29146	29349	204	hypothetical protein [Escherichia phage vB_EcoM_G8]	Unknown function	1	98.51%	QBQ79947.1
50	-	29318	29635	318	hypothetical protein [Escherichia phage EC121]	Unknown function	1	98.10%	ASZ76899.1
51	-	29637	29855	219	hypothetical protein [Escherichia phage T2]	Unknown function	1	98.61%	AYD82661.1
52	-	29839	30396	558	RNA polymerase sigma factor for late transcription [Escherichia phage vB_EcoM_F1]	DNA replication, transcription, translation and nucleotide metabolism	1	99.46%	QLF81650.1
53	-	30475	30744	270	phage protein [Escherichia phage T4_ev151]	Unknown function	1	97.75%	VUF54964.1
54	-	30741	30956	216	hypothetical protein [Enterobacteria phage vB_EcoM_IME340]	Unknown function	1	98.59%	AWD91868.1
55	-	30959	31285	327	hypothetical protein [Enterobacteria phage vB_EcoM_IME340]	Unknown function	1	99.07%	AWD91867.1
56	-	31338	31538	201	hypothetical protein [Enterobacteria phage Aplg8]	Unknown function	1	98.48%	ANZ50922.1
57	-	31539	31670	132	hypothetical protein [Escherichia phage VEc74]	Unknown function	1	95.35%	QOI68252.1
58	-	31678	31971	294	hypothetical protein [Escherichia phage ECML-134]	Unknown function	1	98.97%	YP_009102545.1
59	-	31964	32140	177	hypothetical protein [Escherichia phage slur02]	Unknown function	1	98.28%	YP_009210262.1
60	-	32298	32606	309	glutaredoxin [Escherichia phage ime09]	Additional function	1	98.04%	YP_007004456.1
61	-	32609	32821	213	hypothetical protein [Escherichia phage vB_EcoM_SP1]	Unknown function	1	98.57%	QLF80975.1
62	-	32840	32953	114	head completion protein [Enterobacteria phage T6]	Structure and packaging/ morphogenesis	1	97.30%	AXN58113.1
63	-	32946	33416	471	anaerobic ribonucleoside-triphosphate reductase-activating protein [Escherichia phage ECO4]	DNA replication, transcription, translation and nucleotide metabolism	1	98.72%	ASZ77203.1
64	-	33406	34092	687	homing endonuclease [Escherichia phage UFV-AREG1]	Structure and packaging/ morphogenesis	1	98.68%	YP_009281606.1
65	-	34243	36060	1818	putative anaerobic ribonucleoside-triphosphate reductase [Escherichia phage D5505]	DNA replication, transcription, translation and nucleotide metabolism	1	99.50%	QBO61087.1
66	-	36057	36530	474	recombination endonuclease VII [Escherichia virus RB14]	DNA replication, transcription, translation and nucleotide metabolism	1	98.73%	YP_002854414.1
67	-	36572	37057	486	putative peptidase inhibitor [Escherichia phage D5505]	DNA replication, transcription, translation and nucleotide metabolism	1	98.76%	QBO61090.1
68	-	37041	37208	168	hypothetical protein [Escherichia phage CF2]	Unknown function	1	96.36%	YP_009965500.1
69	-	37180	37350	171	hypothetical protein [Escherichia phage vB_vPM_PD112]	Unknown function	1	91.07%	AYD85349.1
70	-	37353	37568	216	hypothetical protein [Escherichia phage ECML-134]	Unknown function	1	97.18%	YP_009102556.1
71	-	37565	37828	264	thioredoxin [Escherichia virus RB32]	Additional function	1	98.85%	YP_803025.1
72	-	37830	38072	243	thioredoxin [Escherichia phage YUEEL01]	Additional function	0.91	97.26%	APU02718.1
73	-	38059	38376	318	hypothetical protein [Escherichia phage ECML-134]	Unknown function	1	100.00%	YP_009102559.1
74	-	38373	39299	927	hypothetical protein [Escherichia phage VEc74]	Unknown function	1	99.03%	QOI68271.1
75	-	39352	40353	1002	thioredoxin [Escherichia phage vB_EcoM_FT]	Additional function	1	97.30%	QLF81064.1
76	-	40411	41439	1029	thioredoxin [Phage NBEco003]	Additional function	1	96.49%	QIN92304.1
77	-	41448	42338	891	thioredoxin [Enterobacteria phage vB_EcoM_IME340]	Additional function	1	97.97%	AWD91844.1
78	-	42346	42747	402	thioredoxin [Escherichia phage ECO4]	Additional function	1	96.99%	ASZ77218.1
79	-	42803	43330	528	thioredoxin [Escherichia phage vB_EcoM_F1]	Additional function	1	99.43%	QLF81660.1
80	-	43391	43693	303	hypothetical protein [Escherichia phage vB_EcoM_ACG-C40]	Unknown function	1	100.00%	YP_006986643.1
81	-	43776	44495	720	putative site-specific intron-like DNA endonuclease [Escherichia virus RB32]	DNA replication, transcription, translation and nucleotide metabolism	1	98.74%	YP_803035.1
82	-	44492	45460	969	AAA domain-containing protein [Escherichia phage T4_ev151]	Additional function	1	99.07%	VUF55193.1
83	-	45579	46589	1011	hypothetical protein [Enterobacteria phage RB27]	Unknown function	1	98.51%	YP_009102303.1
84	-	46589	47050	462	signal-peptide domain-containing protein [Escherichia phage HY01]	Additional function	1	96.73%	YP_009148542.1
85	-	47053	47574	522	hypothetical protein [Escherichia phage UFV-AREG1]	Unknown function	1	98.27%	YP_009281436.1
86	-	47581	48114	534	phage protein [Escherichia phage T4_ev151]	Unknown function	1	98.87%	VUF55220.1
87	-	48141	48245	105	hypothetical protein [Escherichia phage vB_EcoM_ACG-C40]	Unknown function	1	100.00%	YP_006986654.1
88	-	48306	48479	174	hypothetical protein [Escherichia phage ime09]	Unknown function	1	98.25%	YP_007004482.1
89	-	48469	48663	195	hypothetical protein [Escherichia phage EcNP1]	Unknown function	1	98.44%	QCQ57081.1
90	-	48666	48869	204	hypothetical protein [Enterobacteria phage vB_EcoM_IME340]	Unknown function	1	95.52%	AWD91832.1
91	-	48869	49057	189	hypothetical protein [Escherichia phage ECML-134]	Unknown function	1	96.77%	YP_009102577.1
92	-	49153	49539	387	hypothetical protein [Escherichia phage teqhad]	Unknown function	1	99.22%	QHR63459.1
93	-	49536	49829	294	antiholin [Escherichia phage vB_EcoM_IME537]	Restriction-modification system	1	96.91%	QIW91461.1
94	-	49842	50054	213	hypothetical protein [Enterobacteria phage T6]	Unknown function	1	100.00%	BBF63531.1
95	-	50097	50678	582	thymidine kinase [Escherichia phage vB_EcoM_NBG2]	DNA replication, transcription, translation and nucleotide metabolism	1	98.96%	AWM12042.1
96	-	50680	50868	189	hypothetical protein [Escherichia virus T4]	Unknown function	1	98.39%	NP_049720.1
97	-	50865	51050	184	hypothetical protein [Enterobacteria phage RB33]	Unknown function	1	100.00%	AIT74749.1
98	-	51047	51259	213	hypothetical protein [Escherichia phage vb_EcoM_bov9_1]	Unknown function	1	98.57%	QNR52858.1
99	-	51256	51723	468	hypothetical protein [Enterobacteria phage RB51]	Unknown function	1	98.71%	YP_002854072.1
100	-	51720	52067	348	putative valyl-tRNA synthetase [Escherichia phage JEP6]	DNA replication, transcription, translation and nucleotide metabolism	1	99.13%	QOC55311.1
101	-	52060	52605	546	SLT domain-containing protein [Escherichia virus VEc20]	Additional function	1	99.45%	QDK04246.1
102	-	52613	53074	462	site-specific RNA endonuclease [Escherichia phage RB3]	DNA replication, transcription, translation and nucleotide metabolism	1	99.35%	YP_009098505.1
103	-	53134	53412	279	hypothetical protein [Escherichia phage ECO4]	Unknown function	1	98.91%	ASZ77246.1
104	-	53412	53678	267	hypothetical protein [Enterobacteria phage RB27]	Unknown function	1	98.86%	YP_009102326.1
105	-	53671	53892	222	hypothetical protein [Escherichia phage slur14]	Unknown function	1	98.63%	YP_009180621.1
106	-	53892	54254	363	pyruvate formate-lyase [Escherichia phage YUEEL01]	Additional function	1	98.33%	APU02754.1
107	-	54262	54591	330	hypothetical protein [Escherichia phage vB_EcoM_ACG-C40]	Unknown function	1	100.00%	YP_006986675.1
108	-	54588	55127	540	hypothetical protein [Escherichia phage vB_EcoM-G28]	Unknown function	1	100.00%	AVH85955.1
109	-	55241	55543	303	hypothetical protein [Escherichia phage vB_EcoM_MM02]	Unknown function	1	99.00%	QBQ79172.1
110	-	55585	56163	579	hypothetical protein [Escherichia phage vB_EcoM_G8]	Unknown function	1	100.00%	QBQ80006.1
111	-	56225	56485	261	hypothetical protein [Escherichia phage vB_EcoM_G8]	Unknown function	1	97.67%	QBQ80007.1
112	-	56655	56936	282	hypothetical protein [Escherichia phage vB_EcoM_G2133]	Unknown function	1	98.92%	QBO60868.1
113	-	56933	57421	489	putative baseplate hub subunit and tail lysozyme [Escherichia phage vB_EcoM_G4498]	Host lysis	1	98.15%	QBO64169.1
114	-	57459	57899	441	nudix hydrolase [Escherichia virus VEc20]	Additional function	1	98.63%	QDK04256.1
115	-	57896	58384	489	hypothetical protein [Escherichia phage CF2]	Unknown function	1	94.44%	YP_009965454.1
116	-	58381	58743	363	hypothetical protein [Escherichia phage vB_EcoM_SP1]	Unknown function	1	94.17%	QLF80892.1
117	-	58725	59117	393	hypothetical protein [Escherichia phage vB_EcoM_SP1]	Unknown function	1	97.69%	QLF80883.1
118	-	59086	59688	603	hypothetical protein [Escherichia phage vB_EcoM_SP1]	Unknown function	1	97.00%	QLF80833.1
119	-	59736	60329	594	hypothetical protein [Citrobacter phage vB_CroM_CrRp10]	Unknown function	1	98.98%	AUV59501.1
120	-	60386	60721	336	hypothetical protein [Escherichia phage slur07]	Unknown function	1	96.40%	YP_009197321.1
121	-	60777	61040	264	hypothetical protein [Escherichia virus T4]	Unknown function	1	97.70%	NP_049744.1
		61592	61668		tRNA-Arg (tct)	tRNA
122	-	61672	62337	666	group I intron endonuclease [Escherichia phage vB_EcoM_G2133]	DNA replication, transcription, translation and nucleotide metabolism	1	100.00%	QBO60877.1
		62379	62450		tRNA-Met (cat)	tRNA
		62457	62529		tRNA-Thr (tgt)	tRNA
		62536	62624		tRNA-Ser (tga)	tRNA
		62625	62699		tRNA-Pro (tgg)	tRNA
		62712	62783		tRNA-Gly (tcc)	tRNA
		62790	62783		tRNA-Leu (taa)	tRNA
		62877	62950		tRNA-Gln (ttg)	tRNA
123	-	63048	63335	288	hypothetical protein [Escherichia phage JEP6]	Unknown function	1	96.84%	QOC55334.1
124	-	63338	63721	384	hypothetical protein [Escherichia phage HY01]	Unknown function	1	98.43%	YP_009148581.1
125	-	63723	63908	186	hypothetical protein [Escherichia phage vB_vPM_PD112]	Unknown function	1	98.36%	AYD85407.1
126	-	63979	64287	309	internal head protein 7 [Enterobacteria phage ATK47]	DNA replication, transcription, translation and nucleotide metabolism	1	96.08%	ANZ51054.1
127	-	64348	64620	273	hypothetical protein [Escherichia phage UFV-AREG1]	Unknown function	1	98.89%	YP_009281548.1
128	-	64699	65154	456	hypothetical protein [Escherichia virus T4]	Unknown function	1	99.34%	NP_049750.1
129	-	65154	65396	243	tail fiber assembly protein [Escherichia phage vB_EcoM_Ozark]	Structure and packaging/ morphogenesis	1	96.25%	QLF82044.1
130	-	65396	66121	726	putative deoxynucleotide monophosphate kinase [Escherichia phage vB_EcoM_IME537]	DNA replication/modification	1	99.59%	QIW91499.1
131	-	66171	66701	531	tail completion and sheath stabilizer protein [Escherichia phage vB_EcoM_ACG-C40]	Structure and packaging/ morphogenesis	1	99.43%	YP_006986698.1
132	-	66808	67632	825	DNA end protector protein [Enterobacteria phage vB_EcoM_IME339]	Structure and packaging/ morphogenesis	1	99.27%	AWD91533.1
133	-	67632	68084	453	head completion protein [Escherichia phage JEP6]	Structure and packaging/ morphogenesis	1	99.33%	QOC55343.1
134	+	68132	68722	591	baseplate wedge subunit [Enterobacteria phage vB_EcoM_IME339]	Structure and packaging/ morphogenesis	1	99.49%	AWD91531.1
135	+	68706	70433	1728	baseplate hub subunit and tail lysozyme [Enterobacteria phage vB_EcoM_IME340]	Host lysis	1	99.83%	AWD91786.1
136	+	70426	70962	537	hypothetical protein [Escherichia phage HY03]	Unknown function	1	98.31%	YP_009284011.1
137	+	70962	71255	294	hypothetical protein [Escherichia phage EcNP1]	Unknown function	1	98.97%	QCQ57131.1
138	+	71264	73246	1983	baseplate wedge protein [Escherichia phage ECO4]	Structure and packaging/ morphogenesis	1	99.70%	ASZ77278.1
139	+	73243	76341	3099	Baseplate wedge protein [Enterobacteria phage RB27]	Structure and packaging/ morphogenesis	1	99.81%	YP_009102358.1
140	+	76334	77338	1005	baseplate wedge subunit [Escherichia phage vB_EcoM_F1]	Structure and packaging/ morphogenesis	1	99.40%	QLF81599.1
141	+	77402	78268	867	baseplate wedge tail fiber connector [Enterobacteria phage vB_EcoM_IME340]	Structure and packaging/ morphogenesis	1	99.31%	AWD91780.1
142	+	78268	80073	1806	baseplate wedge protein [Escherichia phage ECML-134]	Structure and packaging/ morphogenesis	1	99.50%	YP_009102628.1
143	+	80073	80732	660	baseplate wedge completion tail pin [Enterobacteria phage RB51]	Structure and packaging/ morphogenesis	1	99.54%	YP_002854115.1
144	+	80729	82279	1551	putative short tail fiber [Escherichia phage HY01]	Structure and packaging/ morphogenesis	1	99.61%	YP_009148601.1
145	+	82289	83746	1458	putative fibritin neck whiskers [Escherichia phage HY01]	Structure and packaging/ morphogenesis	1	99.59%	YP_009148602.1
146	+	83779	84708	930	putative neck protein [Escherichia phage HY01]	Structure and packaging/ morphogenesis	1	100	YP_009148603.1
147	+	84710	85483	774	T4-like phage head completion, neck hetero-dimeric protein [Escherichia phage T4_ev240]	Structure and packaging/ morphogenesis	0.99	99.22%	VUF55743.1
148	+	85522	86340	819	proximal tail sheath stabilization protein [Escherichia phage vB_EcoM_NBG2]	Structure and packaging/ morphogenesis	1	98.90%	AWM12016.1
149	+	86349	86843	495	terminase small subunit [Escherichia phage vB_EcoM_F1]	Structure and packaging/ morphogenesis	1	99.39%	QLF81668.1
150	+	86827	88659	1833	putative terminase DNA packaging enzyme, large subunit [Escherichia phage HY01]	Structure and packaging/ morphogenesis	1	99.67%	YP_009148607.1
151	+	88691	90670	1980	putative tail sheath protein [Escherichia phage vB_EcoM_G2540-3]	Structure and packaging/ morphogenesis	1	99.85%	QBO65573.1
152	+	90787	91278	492	phage tail fiber protein [Escherichia phage ECML-134]	Structure and packaging/ morphogenesis	1	100.00%	YP_009102639.1
153	+	91362	92936	1575	portal protein[Escherichia virus RB32]	Structure and packaging/ morphogenesis	1	100.00%	YP_803110.1
154	+	92936	93184	249	prohead core protein [Enterobacteria phage vB_EcoM_IME340]	Structure and packaging/ morphogenesis	1	98.78%	AWD91767.1
155	+	93184	93609	426	prohead core protein [Escherichia virus RB32]	Structure and packaging/ morphogenesis	1	99.29%	YP_803112.1
156	+	93609	94247	639	prohead core scaffold protein and protease [Escherichia virus RB32]	Structure and packaging/ morphogenesis	1	99.06%	YP_803113.1
157	+	94278	95087	810	putative prohead core protein [Escherichia phage vB_EcoM_G50]	Structure and packaging/ morphogenesis	1	99.63%	QBO65043.1
158	+	95106	96671	1566	major capsid protein [Escherichia phage ECML-134]	Structure and packaging/ morphogenesis	1	99.42%	YP_009102645.1
159	+	96755	98038	1284	capsid vertex protein [Escherichia phage EcNP1]	Structure and packaging/ morphogenesis	1	99.77%	QCQ57153.1
160	-	98068	99072	1005	putative RNA ligase (ATP)[Escherichia phage EcNP1]	DNA replication, transcription, translation and nucleotide metabolism	1	98.20%	QCQ57154.1
161	-	99082	99360	279	hypothetical protein [Escherichia phage vB_EcoM_G2540-3]	Unknown function	1	98.91%	QBO65584.1
162	-	99347	99532	186	hypothetical protein [Enterobacteria phage RB18]	Unknown function	1	96.72%	AXF42487.1
163	-	99651	101069	1419	Hoc highly immunogenic outer protein [Escherichia phage ECO4]	Structure and packaging/ morphogenesis	1	93.64%	ASZ77304.1
164	-	101079	101759	681	minor capsid protein inhibitor of protease [Escherichia phage UFV-AREG1]	Structure and packaging/ morphogenesis	1	99.56%	YP_009281514.1
165	+	101810	103321	1512	RNA-DNA + DNA-DNA helicase [Escherichia phage vB_EcoM_IME537]	DNA replication, transcription, translation and nucleotide metabolism	1	98.01%	QIW91260.1
166	+	103318	103905	588	homing endonuclease [Escherichia phage vB_EcoM_ACG-C40]	Structure and packaging/ morphogenesis	0.81	97.48%	YP_006986737.1
167	+	104032	104262	231	DNA helicase [Escherichia phage vB_EcoM_WL-3]	DNA replication, transcription, translation and nucleotide metabolism	0.77	100.00%	QOQ37553.1
168	-	104318	104485	168	hypothetical protein [Escherichia phage vB_EcoM_KAW1E185]	Unknown function	1	100.00%	QBQ78469.1
169	-	104514	104738	225	hypothetical protein [Escherichia phage vB_EcoM_ACG-C40]	Unknown function	1	98.65%	YP_006986740.1
170	-	104738	105151	414	single stranded DNA-binding protein [Enterobacteria phage vB_EcoM_IME340]	DNA replication, transcription, translation and nucleotide metabolism	1	99.27%	AWD91752.1
171	-	105219	105617	399	putative baseplate wedge subunit [Shigella phage Shfl2] [Escherichia phage slur02]	Structure and packaging/ morphogenesis	1	99.24%	YP_009210106.1
172	-	105617	106243	627	baseplate hub subunit [Enterobacteria phage RB18]	Structure and packaging/ morphogenesis	1	99.52%	AXF42497.1
173	+	106294	107043	750	putative baseplate hub assembly protein [Escherichia phage vB_EcoM-G28]	Structure and packaging/ morphogenesis	1	100.00%	AVH86019.1
174	+	107043	108218	1176	baseplate hub subunit [Escherichia phage PP01]	Structure and packaging/ morphogenesis	1	99.49%	BBC14532.1
175	+	108163	108696	534	baseplate hub distal subunit [Enterobacteria phage RB27]	Structure and packaging/ morphogenesis	1	99.44%	YP_009102393.1
176	+	108693	110465	1773	baseplate hub subunit tail length determinator [Enterobacteria phage vB_EcoM_IME340]	Structure and packaging/ morphogenesis	1	99.66%	AWD91746.1
177	+	110474	111568	1095	tail-tube assembly protein [Escherichia phage slur07]	Structure and packaging/ morphogenesis	1	100.00%	YP_009197263.1
178	+	111568	112533	966	baseplate tail tube initiator [Enterobacteria phage vB_EcoM_IME340]	Structure and packaging/ morphogenesis	1	99.69%	AWD91744.1
179	-	112562	112852	291	hypothetical protein [Escherichia phage ime09]	Unknown function	1	98.96%	YP_007004571.1
180	-	112913	114970	2058	NAD(+)--arginine ADP-ribosyltransferase [Escherichia phage vB_EcoM_NBG2]	DNA replication, transcription, translation and nucleotide metabolism	1	99.42%	AWM11968.1
181	-	114974	117067	2094	NAD(+)--arginine ADP-ribosyltransferase [Escherichia phage PP01]	DNA replication, transcription, translation and nucleotide metabolism	1	98.85%	BBC14539.1
182	-	117120	117308	189	hypothetical protein [Enterobacteria phage T6]	Unknown function	1	96.77%	AXN58234.1
183	-	117305	118765	1461	DNA ligase [Escherichia phage PP01]	DNA replication, transcription, translation and nucleotide metabolism	1	99.18%	BBC14541.1
184	-	118762	119031	270	hypothetical protein [Escherichia phage vB_EcoM-G28]	Unknown function	1	100.00%	AVH86030.1
185	-	119031	119870	840	hypothetical protein [Escherichia phage PP01]	Unknown function	1	99.28%	BBC14543.1
186	-	119867	120325	459	hypothetical protein [Escherichia phage vB_EcoM_G50]	Unknown function	1	95.39%	QBO65071.1
187	-	120318	120524	207	hypothetical protein [Enterobacteria phage vB_EcoM_IME339]	Unknown function	1	97.06%	AWD91479.1
188	-	120521	120718	198	hypothetical protein [Enterobacteria phage RB51]	Unknown function	1	96.92%	YP_002854159.1
189	-	120718	121005	288	hypothetical protein [Escherichia phage HY01]	Unknown function	1	95.79%	YP_009148645.1
190	-	121046	121411	366	hypothetical protein [Enterobacteria phage vB_EcoM_IME339]	Unknown function	1	98.35%	AWD91476.1
191	-	121480	121812	333	phage protein [Escherichia phage T4_ev151]	Unknown function	1	98.18%	VUF55868.1
192	-	121923	122141	219	hypothetical protein [Escherichia phage vB_EcoM_NBG2]	Unknown function	1	100.00%	AWM12167.1
193	-	122496	122744	249	lysis inhibitor accessory protein [Citrobacter phage vB_CroM_CrRp10]	Host lysis	1	98.78%	AUV59579.1
194	-	122892	123227	336	head assembly co-chaperone [Escherichia phage KIT03]	Structure and packaging/ morphogenesis	1	99.10%	BBG28726.1
195	-	123284	123592	309	DUF2693 domain-containing protein [Escherichia phage EcNP1]	Additional function	1	99.02%	QCQ57188.1
196	-	123593	123829	237	hypothetical protein [Escherichia phage PP01]	Unknown function	1	98.72%	BBC14554.1
197	-	123829	124410	582	deoxycytidylate deaminase [Escherichia phage PP01]	DNA replication, transcription, translation and nucleotide metabolism	1	98.96%	BBC14555.1
198	-	124407	124745	339	hypothetical protein [Escherichia virus RB32]	Unknown function	1	99.11%	YP_803154.1
199	-	124742	124978	237	hypothetical protein [Escherichia phage PP01]	Unknown function	1	97.80%	BBC14559.1
200	-	125040	125315	276	hypothetical protein [Enterobacteria phage vB_EcoM_IME339]	Unknown function	1	98.90%	AWD91465.1
201	-	125318	125518	201	hypothetical protein [Escherichia phage vB_EcoM-UFV13]	Unknown function	1	100.00%	YP_009290482.1
202	-	125511	125708	198	hypothetical protein [Escherichia phage EcNP1]	Unknown function	1	95.38%	QCQ57196.1
203	-	125708	126613	906	putative polynucleotide 5'-kinase and 3'-phosphatase [Escherichia phage EcNP1]	DNA replication, transcription, translation and nucleotide metabolism	1	99.00%	QCQ57197.1
204	-	126610	126912	303	hypothetical protein [Escherichia phage vB_EcoM_NBG2]	Unknown function	1	96.00%	AWM12123.1
205	-	126909	127139	231	hypothetical protein [Escherichia phage vB_EcoM-UFV13]	Unknown function	1	98.68%	YP_009290486.1
206	-	127136	127435	300	hypothetical protein [Escherichia phage KIT03]	Unknown function	1	98.99%	BBG28739.1
207	-	127432	127785	354	hypothetical protein [Escherichia phage vB_vPM_PD112]	Unknown function	1	98.29%	AYD85218.1
208	-	127776	128279	504	inhibitor of host transcription [Enterobacteria phage vB_EcoM_IME340]	DNA replication, transcription, translation and nucleotide metabolism	1	98.80%	AWD91713.1
209	-	128344	129468	1125	RNA ligase [Escherichia phage T4_ev240]	DNA replication, transcription, translation and nucleotide metabolism	1	99.47%	VUF56000.1
210	-	129521	129931	411	putative endonuclease [Escherichia phage vB_EcoM_G2540-3]	DNA replication, transcription, translation and nucleotide metabolism	1	98.53%	QBO65634.1
211	-	129959	131137	1179	ribonucleoside-diphosphate reductase [Enterobacteria phage vB_EcoM_IME339]	DNA replication, transcription, translation and nucleotide metabolism	1	99.23%	AWD91454.1
212	-	131189	133453	2265	ribonucleoside-diphosphate reductase/ Ribonucleotide reductase of class Ia (aerobic), alpha subunit (EC [Escherichia phage T4_ev240]	DNA replication, transcription, translation and nucleotide metabolism	1	100.00%	VUF56009.1
213	-	133444	133731	288	hypothetical protein [Enterobacteria phage RB51]	Unknown function	1	98.95%	YP_002854184.1
214	-	133724	133987	264	hypothetical protein [Escherichia phage vB_EcoM_R5505]	Unknown function	1	100.00%	QBQ79843.1
215	-	134011	134871	861	thymidylate synthase [Escherichia phage vB_EcoM_SP1]	DNA replication/modification	1	98.60%	QLF80807.1
216	-	134917	135264	348	hypothetical protein [Escherichia phage HY01]	Unknown function	1	98.26%	YP_009148673.1
217	-	135285	135866	582	dihydrofolate reductase [Escherichia phage vB_EcoM-UFV13]	DNA replication, transcription, translation and nucleotide metabolism	1	94.30%	YP_009290498.1
218	-	135866	136111	246	hypothetical protein [Escherichia phage ECML-134]	Unknown function	1	97.53%	YP_009102709.1
219	-	136120	136455	336	hypothetical protein [Escherichia phage EcNP1]	Unknown function	1	98.20%	QCQ57212.1
220	-	136466	136708	243	hypothetical protein [Escherichia phage vB_EcoM_G50]	Unknown function	1	100.00%	QBO65107.1
221	-	136763	137128	366	hypothetical protein [Escherichia phage RB3]	Unknown function	1	98.35%	YP_009098622.1
222	-	137172	137399	228	hypothetical protein [Enterobacteria phage vB_EcoM_IME339]	Unknown function	1	100.00%	AWD91445.1
223	-	137544	138452	909	helix-destabilizing protein [Escherichia phage YUEEL01]	DNA replication, transcription, translation and nucleotide metabolism	1	100.00%	APU02593.1
224	-	138552	139205	654	putative loader of DNA helicase and ssDNA binding protein [Escherichia phage teqskov]	DNA replication, transcription, translation and nucleotide metabolism	1	99.54%	QHR64210.1
225	-	139202	139540	339	hypothetical protein [Escherichia phage vB_EcoM-G28]	Unknown function	1	99.10%	AVH86073.1
226	-	139518	139787	270	putative double-stranded DNA binding protein [Escherichia phage vB_EcoM_G2133]	DNA replication, transcription, translation and nucleotide metabolism	1	98.88%	QBO60981.1
227	-	139796	140713	918	RNaseH [Enterobacteria phage vB_EcoM_IME340]	DNA replication, transcription, translation and nucleotide metabolism	1	99.02%	AWD91694.1
228	+	140818	144687	3870	long tail fiber proximal subunit [Enterobacteria phage RB27]	Structure and packaging/ morphogenesis	1	98.45%	YP_009102446.1
229	+	144696	145814	1119	hinge connector of long tail fiber, proximal connector [Escherichia phage PP01]	Structure and packaging/ morphogenesis	1	98.12%	BBC14586.1
230	+	145877	146533	657	putative tail fiber [Escherichia phage vB_EcoM-G28]	Structure and packaging/ morphogenesis	1	98.62%	AVH86078.1
231	+	146542	149781	3240	long tail fiber protein [Shigella phage Shf125875]	Structure and packaging/ morphogenesis	1	92.40%	YP_009100788.1
232	+	149812	150591	780	putative tail fiber adhesin [Escherichia phage vB_EcoM_G2540-3]	Structure and packaging/ morphogenesis	1	92.66%	QBO65661.1
233	+	150622	151278	657	holin [Escherichia phage vB_EcoM_G2133]	Host lysis	1	99.54%	QBO60988.1
234	-	151279	151551	273	anti-sigma 70 protein [Escherichia phage vB_EcoM_IME537]	DNA replication, transcription, translation and nucleotide metabolism	1	98.89%	QIW91330.1
235	-	151564	151716	153	phage anti-sigma factor [Escherichia phage T4_ev240]	DNA replication, transcription, translation and nucleotide metabolism	1	98.00%	VUF56055.1
236	-	151713	151991	279	putative baseplate wedge tail fiber connector [Escherichia phage HY03]	Structure and packaging/ morphogenesis	1	97.83%	YP_009284205.1
237	-	151981	152100	120	hypothetical protein [Enterobacteria phage vB_EcoM_IME340]	Unknown function	1	97.44%	AWD91684.1
238	-	152277	152573	297	anti-restriction nuclease [Enterobacteria phage vB_EcoM_IME340]	Restriction-modification system	1	97.96%	AWD91683.1
239	-	152573	153034	462	anti-restriction nuclease [Enterobacteria phage vB_EcoM_IME340]	Restriction-modification system	1	98.04%	AWD91682.1
240	-	153031	153360	330	hypothetical protein [Escherichia phage ime09]	Unknown function	1	99.08%	YP_007004633.1
241	-	153371	154006	636	activator of middle period transcription [Escherichia phage YUEEL01]	DNA replication, transcription, translation and nucleotide metabolism	1	99.53%	APU02612.1
242	-	154132	154281	150	hypothetical protein [Escherichia phage VEc74]	Unknown function	1	97.96%	QOI68440.1
243	-	154278	155606	1329	DNA topoisomerase [Escherichia phage vB_EcoM_SP1]	DNA replication, transcription, translation and nucleotide metabolism	1	99.77%	QLF80779.1
244	-	155744	155899	156	acridine resistance protein [Escherichia virus T4]	Additional function	1	98.04%	NP_049877.1
245	-	155987	156445	459	nucleoid disruption protein [Escherichia phage PP01]	DNA replication, transcription, translation and nucleotide metabolism	1	99.34%	BBC14605.1
246	-	156504	156719	216	hypothetical protein [Escherichia phage vB_EcoM_ACG-C40]	Unknown function	1	100.00%	YP_006986826.1
247	-	156728	156838	111	predicted outer membrane protein [Escherichia virus T4]	Structure and packaging/ morphogenesis	1	97.22%	NP_049881.1
248	-	156835	157032	198	hypothetical protein [Escherichia phage JEP6]	Unknown function	1	98.46%	QOC55184.1
249	-	157040	157153	114	putative inner membrane protein [Enterobacteria phage Aplg8]	Structure and packaging/ morphogenesis	1	97.30%	ANZ50853.1
250	-	157219	157317	99	hypothetical protein [Escherichia phage slur02]	Unknown function	1	100.00%	YP_009210186.1
251	-	157434	157640	207	hypothetical protein [Escherichia phage vB_EcoM_SP1]	Unknown function	1	97.06%	QLF80976.1
252	-	157720	158277	558	endonuclease IV [Enterobacteria phage vB_EcoM_IME340]	DNA replication, transcription, translation and nucleotide metabolism	1	99.46%	AWD91672.1
253	-	158360	158554	195	hypothetical protein [Enterobacteria phage RB51]	Unknown function	1	98.44%	YP_002854227.1
254	-	158583	159521	939	rIIB lysis inhibitor [Enterobacteria phage vB_EcoM_IME340]	Host lysis	1	99.36%	AWD91670.1
255	-	159533	161710	2178	protector from prophage-induced early lysis [Escherichia phage T4]	Host lysis	1	99.17%	QPI17227.1
256	-	161721	161924	204	hypothetical protein [Escherichia phage vB_EcoM_FT]	Unknown function	1	98.51%	QLF81247.1
257	-	161979	162272	294	DNA topoisomerase subunit DNA-dependent ATPase [Escherichia phage vB_EcoM_112]	DNA replication, transcription, translation and nucleotide metabolism	1	98.97%	YP_009030887.1
258	-	162371	162511	141	putative type II DNA topoisomerase [Escherichia phage PEC04]	DNA replication, transcription, translation and nucleotide metabolism	1	95.65%	AKN44613.1
259	-	162492	163310	819	homing endonuclease [Escherichia phage vB_EcoM_112]	Structure and packaging/ morphogenesis	1	99.63%	YP_009030888.1
260	-	163288	164838	1551	DNA topoisomerase II large subunit [Enterobacteria phage T4T]	DNA replication, transcription, translation and nucleotide metabolism	1	99.03%	ADJ39723.1
261	-	164908	165168	261	hypothetical protein [Escherichia virus RB14]	Unknown function	1	98.84%	YP_002854340.1
262	-	165171	165347	177	hypothetical protein [Enterobacteria phage T4T]	Unknown function	1	96.55%	ADJ39725.1
263	-	165350	165754	405	mRNA metabolism modulator [Escherichia phage CF2]	DNA replication, transcription, translation and nucleotide metabolism	1	91.97%	YP_009965576.1
264	-	165754	165969	216	Modifier of suppressor tRNAs [Escherichia virus T4]	DNA replication, transcription, translation and nucleotide metabolism	1	97.18%	NP_049625.1
265	-	166142	166630	489	transcriptional regulator [Escherichia phage PE37]	DNA replication, transcription, translation and nucleotide metabolism	1	98.15%	ANH49853.1
266	-	166708	167247	540	transcriptional regulator [Phage NBEco003]	DNA replication, transcription, translation and nucleotide metabolism	1	98.32%	QIN92380.1
267	-	167250	167750	501	hypothetical protein [Escherichia phage vB_EcoM-UFV13]	Unknown function	1	99.40%	YP_009290278.1

## Sheet: BF17
ORF No.	Strand	Start	Stop	Length (bp	Predicted protein [best-matched organism]	Functional group	Query coverage (%)	Identity (%)	Accession
1	+	1757	2119	363	hypothetical protein	Unknown function
2	+	2214	2447	234	hypothetical protein	Unknown function
3	+	2530	2769	240	hypothetical protein	Unknown function
4	+	2856	3122	267	hypothetical protein	Unknown function
5	+	3210	3440	231	hypothetical protein	Unknown function
6	+	3867	4478	612	hypothetical protein	Unknown function
7	+	4570	4809	240	hypothetical protein	Unknown function
8	+	4867	5127	261	hypothetical protein	Unknown function
9	+	5184	5435	252	hypothetical protein	Unknown function
10	+	5679	5915	237	hypothetical protein	Unknown function
11	+	6000	6299	300	hypothetical protein	Unknown function
12	+	6321	6551	231	hypothetical protein	Unknown function
13	+	6785	7267	483	hypothetical protein	Unknown function
14	+	7552	7779	228	hypothetical protein	Unknown function
15	+	7866	8009	144	hypothetical protein	Unknown function
16	+	8089	8301	213	hypothetical protein	Unknown function
17	+	8391	8714	324	hypothetical protein	Unknown function
18	+	8795	9064	270	hypothetical protein	Unknown function
19	+	9116	9388	273	hypothetical protein	Unknown function
20	+	9394	9603	210	hypothetical protein	Unknown function
21	+	9673	9819	147	hypothetical protein	Unknown function
22	+	9901	10053	153	hypothetical protein	Unknown function
23	+	10140	10259	120	hypothetical protein	Unknown function
24	+	10474	10815	342	hypothetical protein	Unknown function
25	+	10907	11119	213	hypothetical protein	Unknown function
26	+	11203	11382	180	hypothetical protein	Unknown function
27	+	11482	11625	144	hypothetical protein	Unknown function
28	+	11731	11928	198	hypothetical protein	Unknown function
29	+	12260	12517	258	DksA C4-type domain-containing protein [Escherichia phage vB_EcoM_phAPEC6]	Additional function	100.00%	96.47%	QDF14136.1
30	+	12599	12787	189	hypothetical protein	Unknown function
31	+	12815	13138	324	hypothetical protein	Unknown function
32	+	13222	13434	213	hypothetical protein	Unknown function
33	+	13452	13544	93	hypothetical protein	Unknown function
34	+	13541	13714	174	hypothetical protein	Unknown function
35	+	13711	13860	150	hypothetical protein	Unknown function
36	+	14176	14451	276	hypothetical protein	Unknown function
37	+	14538	14720	183	hypothetical protein	Unknown function
38	+	14809	15132	324	hypothetical protein	Unknown function
39	+	15228	15623	396	hypothetical protein	Unknown function
40	+	15686	15940	255	hypothetical protein	Unknown function
41	+	15994	16212	219	hypothetical protein	Unknown function
42	+	16270	16512	243	hypothetical protein	Unknown function
43	+	16544	17128	585	hypothetical protein	Unknown function
44	+	17352	17573	222	hypothetical protein	Unknown function
45	+	17658	17930	273	hypothetical protein	Unknown function
46	+	17927	18118	192	hypothetical protein	Unknown function
47	+	18205	18468	264	hypothetical protein	Unknown function
48	+	18536	18760	225	hypothetical protein	Unknown function
49	-	18752	18838	87	hypothetical protein	Unknown function
50	+	18837	19094	258	hypothetical protein	Unknown function
51	+	19337	19669	333	hypothetical protein	Unknown function
52	+	19759	20160	402	hypothetical protein	Unknown function
53	+	20229	20438	210	hypothetical protein	Unknown function
54	+	20723	21088	366	hypothetical protein	Unknown function
55	+	21175	21372	198	hypothetical protein	Unknown function
56	+	21369	21569	201	hypothetical protein	Unknown function
57	+	21566	21775	210	hypothetical protein	Unknown function
58	+	21772	21987	216	hypothetical protein	Unknown function
59	+	21984	22196	213	hypothetical protein	Unknown function
60	+	22193	22411	219	hypothetical protein	Unknown function
61	+	22408	22716	309	hypothetical protein	Unknown function
62	+	22879	23130	252	hypothetical protein	Unknown function
63	+	23114	23329	216	hypothetical protein	Unknown function
64	+	23326	23544	219	hypothetical protein	Unknown function
65	+	23535	23753	219	hypothetical protein	Unknown function
66	+	23750	23980	231	hypothetical protein	Unknown function
67	+	23982	24221	240	hypothetical protein	Unknown function
68	+	24251	24514	264	hypothetical protein	Unknown function
69	+	24511	24726	216	hypothetical protein	Unknown function
70	+	24727	24981	255	hypothetical protein	Unknown function
71	+	24953	25204	252	hypothetical protein	Unknown function
72	+	25173	25415	243	hypothetical protein	Unknown function
73	+	25412	25642	231	hypothetical protein	Unknown function
74	+	25620	25841	222	hypothetical protein	Unknown function
75	+	25832	26065	234	hypothetical protein	Unknown function
76	+	26250	26480	231	hypothetical protein	Unknown function
77	+	26477	26647	171	hypothetical protein	Unknown function
78	+	26690	26911	222	hypothetical protein	Unknown function
79	+	26913	27155	243	hypothetical protein	Unknown function
80	+	27145	27489	345	hypothetical protein	Unknown function
81	+	27455	27850	396	hypothetical protein	Unknown function
82	+	27912	28157	246	hypothetical protein	Unknown function
83	+	28154	28465	312	hypothetical protein	Unknown function
84	+	28455	28661	207	hypothetical protein	Unknown function
85	+	28634	28897	264	hypothetical protein	Unknown function
86	+	28869	29255	387	hypothetical protein	Unknown function
87	+	29243	29404	162	hypothetical protein	Unknown function
88	+	29404	29607	204	hypothetical protein	Unknown function
89	+	29724	30158	435	hypothetical protein	Unknown function
90	+	30242	30748	507	hypothetical protein	Unknown function
91	+	30738	31049	312	hypothetical protein	Unknown function
92	+	31021	31587	567	hypothetical protein	Unknown function
93	+	31574	31915	342	hypothetical protein	Unknown function
94	+	31903	32400	498	hypothetical protein	Unknown function
95	+	32483	32995	513	hypothetical protein	Unknown function
96	+	32992	33522	531	hypothetical protein	Unknown function
97	+	33524	34138	615	hypothetical protein	Unknown function
98	+	34140	34334	195	hypothetical protein	Unknown function
99	+	34343	34858	516	hypothetical protein	Unknown function
100	+	34855	35196	342	hypothetical protein	Unknown function
101	+	35207	35749	543	hypothetical protein	Unknown function
102	+	35925	36134	210	hypothetical protein	Unknown function
103	+	36121	36357	237	hypothetical protein	Unknown function
104	+	36596	36934	339	hypothetical protein	Unknown function
105	+	36934	37095	162	hypothetical protein	Unknown function
106	+	37092	37463	372	hypothetical protein	Unknown function
107	+	37463	37819	357	hypothetical protein	Unknown function
108	+	37816	38175	360	hypothetical protein	Unknown function
109	+	38185	38676	492	hypothetical protein	Unknown function
110	+	38678	39148	471	hypothetical protein	Unknown function
111	+	39145	39588	444	hypothetical protein	Unknown function
112	+	39588	40076	489	hypothetical protein	Unknown function
113	+	40054	40506	453	hypothetical protein	Unknown function
114	+	40503	40817	315	hypothetical protein	Unknown function
115	+	40817	41125	309	hypothetical protein	Unknown function
116	+	41122	41571	450	hypothetical protein	Unknown function
117	+	41571	42104	534	hypothetical protein	Unknown function
118	+	42082	42300	219	hypothetical protein	Unknown function
119	+	42278	42469	192	hypothetical protein	Unknown function
120	+	42459	43019	561	hypothetical protein	Unknown function
121	+	43010	43612	603	hypothetical protein	Unknown function
122	+	43618	43980	363	hypothetical protein	Unknown function
123	+	43970	44305	336	hypothetical protein	Unknown function
124	+	44295	44849	555	hypothetical protein	Unknown function
125	+	44909	45385	477	hypothetical protein	Unknown function
126	+	45382	45876	495	hypothetical protein	Unknown function
127	+	45869	46204	336	hypothetical protein	Unknown function
128	+	46188	46601	414	hypothetical protein	Unknown function
129	+	46601	47083	483	hypothetical protein	Unknown function
130	+	47067	47609	543	hypothetical protein	Unknown function
131	+	47606	48169	564	hypothetical protein	Unknown function
132	+	48162	48680	519	hypothetical protein	Unknown function
133	+	48768	49334	567	hypothetical protein	Unknown function
134	+	49331	49915	585	hypothetical protein	Unknown function
135	+	49902	50483	582	hypothetical protein	Unknown function
136	+	50480	50908	429	hypothetical protein	Unknown function
137	+	50905	51414	510	hypothetical protein	Unknown function
138	+	51398	51979	582	hypothetical protein	Unknown function
139	+	52041	52592	552	hypothetical protein	Unknown function
140	+	52589	53191	603	hypothetical protein	Unknown function
141	+	53181	53765	585	hypothetical protein	Unknown function
142	+	53775	54188	414	hypothetical protein	Unknown function
143	+	54188	54724	537	hypothetical protein	Unknown function
144	+	54718	55191	474	hypothetical protein	Unknown function
145	+	55139	55552	414	hypothetical protein	Unknown function
146	+	55543	56040	498	hypothetical protein	Unknown function
147	+	56083	56556	474	hypothetical protein	Unknown function
148	+	56559	56690	132	hypothetical protein	Unknown function
149	+	56720	57568	849	hypothetical protein	Unknown function
150	+	57585	57878	294	hypothetical protein	Unknown function
151	+	57950	58336	387	hypothetical protein	Unknown function
152	+	58386	58691	306	hypothetical protein	Unknown function
153	+	58743	59597	855	hypothetical protein	Unknown function
154	+	60280	60822	543	hypothetical protein	Unknown function
155	+	60839	61360	522	Methylase [Escherichia phage PBECO4]	R-M system	100.00%	100.00%	YP_009150462.1			173
156	+	61357	61890	534	hypothetical protein	Unknown function						177
157	+	61893	62186	294	hypothetical protein	Unknown function
158	+	62179	62466	288	hypothetical protein	Unknown function
159	+	62447	63067	621	hypothetical protein	Unknown function
160	+	63114	63389	276	hypothetical protein	Unknown function
161	+	63386	63652	267	hypothetical protein	Unknown function
162	+	63643	63954	312	hypothetical protein	Unknown function
163	+	63965	64276	312	hypothetical protein	Unknown function
164	+	64239	64523	285	hypothetical protein	Unknown function
165	+	64516	64716	201	hypothetical protein	Unknown function
166	+	64709	64972	264	hypothetical protein	Unknown function
167	+	64969	65259	291	hypothetical protein	Unknown function
168	+	65256	65432	177	hypothetical protein	Unknown function
169	+	65419	65697	279	hypothetical protein	Unknown function
170	+	65756	66484	729	hypothetical protein	Unknown function
171	+	66495	66776	282	hypothetical protein	Unknown function
172	+	66821	67123	303	hypothetical protein	Unknown function
173	+	67131	67709	579	hypothetical protein	Unknown function
174	+	67706	68395	690	hypothetical protein	Unknown function
175	+	68397	68660	264	hypothetical protein	Unknown function
176	+	68657	69799	1143	RNA ligase [Escherichia phage PBECO4]	DNA replication, transcription, translation and nucleotide metabolism	0.99	99.73%	YP_009150443.1			377
177	+	69830	70084	255	hypothetical protein	Unknown function
178	+	70094	70330	237	hypothetical protein	Unknown function
179	+	70308	70619	312	hypothetical protein	Unknown function
180	+	70623	71555	933	polynucleotide 5'-kinase and 3'-phosphatase [Escherichia phage PBECO4]	DNA replication, transcription, translation and nucleotide metabolism	1	99.03%	YP_009150439.1			310
181	+	71781	72041	261	hypothetical protein	Unknown function
182	+	72041	72292	252	hypothetical protein	Unknown function
183	+	72285	72587	303	hypothetical protein	Unknown function
184	+	72584	72880	297	hypothetical protein	Unknown function
185	+	72881	73186	306	hypothetical protein	Unknown function
186	+	73304	73570	267	hypothetical protein	Unknown function
187	+	73548	74201	654	hypothetical protein	Unknown function
188	+	74201	74530	330	hypothetical protein	Unknown function
189	+	74533	74748	216	hypothetical protein	Unknown function
190	+	74748	74999	252	hypothetical protein	Unknown function
191	+	75002	75745	744	putative serine/threonine protein phosphatase [Escherichia phage vB_EcoM_phAPEC6]	Additional function	1	100.00%	QDF13986.1			252
192	+	75751	76020	270	hypothetical protein	Unknown function
193	+	76031	76258	228	hypothetical protein	Unknown function
194	+	76255	76668	414	hypothetical protein	Unknown function
195	+	76668	77867	1200	hypothetical protein	Unknown function
196	+	77879	79297	1419	DNA ligase [Escherichia phage PBECO4]	DNA replication, transcription, translation and nucleotide metabolism	1	99.58%	YP_009150423.1			472
197	+	79317	80108	792	Ser/Thr protein phosphatase family protein [Escherichia phage PBECO4]	Additional function	1	99.24%	YP_009150422.1			263
198	+	80121	80504	384	hypothetical protein	Unknown function
199	+	80506	80910	405	hypothetical protein	Unknown function
200	+	80975	81670	696	protease [Escherichia phage UB]	Additional function	1	99.13%	AXC36901.1			231
201	+	81719	82009	291	hypothetical protein	Unknown function
202	+	82011	82457	447	hypothetical protein	Unknown function
203	+	82584	83132	549	hypothetical protein	Unknown function
204	+	83104	83628	525	hypothetical protein	Unknown function
205	+	83585	84064	480	dCMP deaminase [Escherichia phage PBECO4]	DNA replication, transcription, translation and nucleotide metabolism	0.96	99.35%	YP_009150413.1			153
206	+	84061	84318	258	hypothetical protein	Unknown function						62
207	-	84349	84726	378	putative structural protein [Escherichia phage PBECO4]	Structure and packaging/ morphogenesis	1	100.00%	YP_009150412.1			125
208	+	84951	85559	609	hypothetical protein	Unknown function
209	+	85630	85890	261	hypothetical protein	Unknown function
210	+	85887	86480	594	hypothetical protein	Unknown function
211	+	86511	86702		hypothetical protein	Unknown function
212	+	86712	87464	753	NAD-dependent protein deacylase [Escherichia phage SP27]	DNA replication, transcription, translation and nucleotide metabolism	1	99.60%	BBM62037.1			250
213	+	87461	88012	552	nudix hydrolase [Escherichia phage PBECO4]	Additional function	1	99.45%	YP_009150408.1			183
214	+	88022	88342	321	hypothetical protein	Unknown function
215	+	88339	88641	303	hypothetical protein	Unknown function
216	+	88702	90141	1440	hypothetical protein	Unknown function
217	+	90210	90398	189	hypothetical protein	Unknown function
218	+	90625	91182	558	hypothetical protein	Unknown function
219	+	91210	91539	330	hypothetical protein	Unknown function
220	+	91539	92189	651	hypothetical protein	Unknown function
221	+	92203	92307	105	hypothetical protein	Unknown function
222	+	92407	93378	972	WGR domain containing protein [Escherichia phage UB]	Additional function	100.00%	99.69%	AXC36881.1			323
223	+	93375	93755	381	hypothetical protein	Unknown function
224	+	93768	94001	234	hypothetical protein	Unknown function
225	+	93998	94168	171	hypothetical protein	Unknown function
226	+	94165	94524	360	hypothetical protein	Unknown function
227	+	94571	95185	615	hypothetical protein	Unknown function
228	+	95182	95550	369	hypothetical protein	Unknown function
229	+	95547	95768	222	hypothetical protein	Unknown function
230	+	95779	96138	360	hypothetical protein	Unknown function
231	+	96369	96779	411	hypothetical protein	Unknown function
232	+	96769	96954	186	hypothetical protein	Unknown function
233	+	96941	97057	117	hypothetical protein	Unknown function
234	+	97217	99022	1806	anaerobic ribonucleoside-triphosphate reductase [Escherichia phage SP27]	DNA replication, transcription, translation and nucleotide metabolism	1	99.83%	BBM62057.1			601
235	+	99031	99363	333	hypothetical protein	Unknown function
236	+	99335	99805	471	Anaerobic ribonucleoside-triphosphate reductase-activating protein [Escherichia phage PBECO4]	DNA replication, transcription, translation and nucleotide metabolism	1	99.36%	YP_009150388.1			156
237	+	99882	102578	2697	hypothetical protein	Unknown function
238	+	102590	103177	588	hypothetical protein	Unknown function
239	+	103194	105923	2730	hypothetical protein	Unknown function
240	+	105991	106557	567	hypothetical protein	Unknown function
241	+	106570	107085	516	hypothetical protein	Unknown function
242	+	107082	107591	510	hypothetical protein	Unknown function
243	+	107594	107995	402	hypothetical protein	Unknown function
244	+	107992	109224	1233	hypothetical protein	Unknown function
245	+	109302	109430	129	hypothetical protein	Unknown function
246	+	109408	109929	522	hypothetical protein	Unknown function
247	+	109931	112720	2790	hypothetical protein	Unknown function
248	+	112796	113215	420	hypothetical protein	Unknown function
249	+	113269	113643	375	hypothetical protein	Unknown function
250	+	113640	113948	309	hypothetical protein	Unknown function
251	+	113950	114561	612	hypothetical protein	Unknown function
252	+	114614	114970	357	hypothetical protein	Unknown function
253	+	114972	115370	399	hypothetical protein	Unknown function
254	+	116061	116489	429	hypothetical protein	Unknown function
255	+	116522	116962	441	hypothetical protein	Unknown function
256	+	117011	117628	618	hypothetical protein	Unknown function
257	+	117641	117994	354	hypothetical protein	Unknown function
258	+	117975	118367	393	hypothetical protein	Unknown function
259	+	118364	118951	588	hypothetical protein	Unknown function
260	+	118965	119246	282	hypothetical protein	Unknown function
261	+	119255	119734	480	hypothetical protein	Unknown function
262	+	119724	120062	339	hypothetical protein	Unknown function
263	+	120055	120639	585	hypothetical protein	Unknown function
264	+	120632	120856	225	hypothetical protein	Unknown function
265	+	120900	121343	444	hypothetical protein	Unknown function
266	+	121346	121735	390	hypothetical protein	Unknown function
267	+	121765	122109	345	hypothetical protein	Unknown function
268	+	122121	122252	132	hypothetical protein	Unknown function
269	+	122256	122459	204	hypothetical protein	Unknown function
270	+	122467	122877	411	hypothetical protein	Unknown function
271	+	123045	123971	927	lysozyme [Escherichia phage 121Q]	Host lysis	1	89.94%	YP_009102119.1			308
272	+	123987	124319	333	hypothetical protein	Unknown function
273	+	124374	124790	417	hypothetical protein	Unknown function
274	+	124826	125011	186	hypothetical protein	Unknown function
275	+	125008	125415	408	hypothetical protein	Unknown function
276	+	125402	125824	423	hypothetical protein	Unknown function
277	+	125836	125958	123	hypothetical protein	Unknown function
278	+	125960	127075	1116	hypothetical protein	Unknown function
279	+	127185	127595	411	nudix hydrolase [Escherichia phage 121Q]	Additional function	0.97	90.91%	YP_009102127.1			132
280	+	127585	127833	249	hypothetical protein	Unknown function
281	+	127833	128075	243	hypothetical protein	Unknown function
282	+	128121	128363	243	hypothetical protein	Unknown function
283	+	128415	128891	477	hypothetical protein	Unknown function
284	+	128911	129219	309	hypothetical protein	Unknown function
285	+	129232	129609	378	hypothetical protein	Unknown function
286	+	129871	130662	792	hypothetical protein	Unknown function
287	+	130742	131020	279	hypothetical protein	Unknown function
288	+	131039	131665	627	putative deoxynucleoside monophosphate kinase [Escherichia phage PBECO4]	DNA replication, transcription, translation and nucleotide metabolism	0.99	88.89%	YP_009150337.1			208
289	+	131760	134423	2664	tail sheath protein [Escherichia phage SP27]	Structure and packaging/ morphogenesis	1	93.12%	BBM62113.1			887
290	+	134507	134653	147	hypothetical protein	Unknown function
291	+	134811	135497	687	hypothetical protein	Unknown function
292	+	135587	136363	777	hypothetical protein	Unknown function
293	+	136375	137469	1095	hypothetical protein	Unknown function
294	+	137470	137898	429	head completion protein [Escherichia phage Ecwhy_1]	Structure and packaging/ morphogenesis	1	100.00%	QAY00503.1
295	+	137929	138486	558	hypothetical protein	Unknown function
296	+	138514	139047	534	hypothetical protein	Unknown function
297	+	139051	139596	546	hypothetical protein	Unknown function
298	+	139610	141121	1512	hypothetical protein	Unknown function
299	+	141144	142133	990	hypothetical protein	Unknown function
300	+	142135	142527	393	hypothetical protein	Unknown function
301	+	142531	142908	378	hypothetical protein	Unknown function
302	+	143225	144553	1329	ATPase [Escherichia phage PBECO4]	Additional function	1	93.67%	YP_009150324.1			441
303	+	144629	146038	1410	putative HNH endonuclease [Escherichia phage PBECO4]	Structure and packaging/ morphogenesis	0.99	89.79%	YP_009150323.1			474
304	+	146148	146378	231	hypothetical protein	Unknown function
305	+	146381	147034	654	hypothetical protein	Unknown function
306	+	147040	147633	594	hypothetical protein	Unknown function
307	+	147633	148562	930	thymidylate synthase [Escherichia phage UB]	DNA replication, transcription, translation and nucleotide metabolism	1	92.56%	AXC36805.1			309
308	-	148595	150559	1965	hypothetical protein	Unknown function
309	-	150650	151429	780	hypothetical protein	Unknown function
310	-	151496	157216	5721	long tail fiber proximal subunit [Escherichia phage Ecwhy_1]	Structure and packaging/ morphogenesis	1	96.96%	QAY00487.1			1899
311	-	157366	162282	4917	long tail fiber proximal subunit [Escherichia phage Ecwhy_1]	Structure and packaging/ morphogenesis	1	97.26%	QAY00486.1			1644
312	-	162401	163300	900	hypothetical protein	Unknown function		1	0.0			298
313	-	163315	165456	2142	putative colanic acid biosynthesis protein [Escherichia phage vB_Eco_slurp01]	Additional function	0.99	86.80%	SCA80448.1			713
314	-	165471	166598	1128	hypothetical protein	Unknown function
315	+	166708	167205	498	hypothetical protein	Unknown function						153
316	+	167215	167823	609	hypothetical protein	Unknown function						202
317	+	167836	168936	1101	hypothetical protein	Unknown function
318	-	168970	169434	465	Nudix hydrolase domain-containing protein [Escherichia phage vB_EcoM_G17]	Additional function	1	96.10%	QBO61834.1			154
319	-	169447	170790	1344	hypothetical protein	Unknown function						440
320	-	170787	172283	1497	hypothetical protein	Unknown function
321	+	172392	174680	2289	hypothetical protein	Unknown function
322	-	174714	184685	9972	hypothetical protein	Unknown function
323	-	184766	188227	3462	hypothetical protein	Unknown function
324	-	188330	188725	396	hypGPW_gp25 domain-containing protein [Escherichia phage SP27]	Additional function	1	95.42%	BBM62147.1			131
325	-	188741	189229	489	putative baseplate hub subunit and tail lysozyme [Escherichia phage vB_EcoM_G17]	Host lysis	1	90.74%	QBO61827.1			162
326	-	189267	191930	2664	putative virion protein and lysozyme murein [Escherichia phage PBECO4]	Host lysis	1	92.78%	YP_009150848.1			887
327	-	191944	194199	2256	hypothetical protein	Unknown function
328	-	194211	194525	315	hypothetical protein	Unknown function
329	-	194525	195256	732	hypothetical protein	Unknown function
330	+	195289	196227	939	putative RNA polymerase sigma factor [Escherichia phage vB_EcoM_G17]	DNA replication, transcription, translation and nucleotide metabolism	0.89	94.98%	QBO61822.1			279
331	+	196214	197245	1032	nuclease subunit [Escherichia phage UB]	DNA replication, transcription, translation and nucleotide metabolism	1	95.34%	AXC36781.1			343
332	+	197282	199405	2124	recombination endonuclease subunit [Escherichia phage PBECO4]	DNA replication, transcription, translation and nucleotide metabolism	1	91.51%	YP_009150842.1			715
333	-	199424	199915	492	DNA endonuclease VII [Escherichia phage 121Q]	DNA replication, transcription, translation and nucleotide metabolism	1	90.80%	YP_009102181.1			163
334	-	200753	200962	210	hypothetical protein	Unknown function
335	-	200962	201798	837	baseplate hub subunit [Escherichia phage Ecwhy_1]	Structure and packaging/ morphogenesis	1	99.64%	QAY00463.1			278
336	+	201944	204142	2199	hypothetical protein	Unknown function
337	+	204155	205891	1737	portal protein [Escherichia phage 121Q]	Structure and packaging/ morphogenesis	0.98	96.86%	YP_009102185.1			573
338	+	205965	206192	228	hypothetical protein	Unknown function
339	+	206293	207123	831	hypothetical protein	Unknown function
340	+	207155	207775	621	prohead assembly (scaffolding) protein [Escherichia phage CMSTMSU]	Structure and packaging/ morphogenesis	0.8	99.40%	AXC39291.1			169
341	+	207842	208957	1116	hypothetical protein	Unknown function
342	+	209048	210223	1176	major capsid protein [Escherichia phage UB]	Structure and packaging/ morphogenesis	1	98.72%	AXC36770.1			391
343	+	210352	211458	1107	hypothetical protein	Unknown function
344	+	211482	211832	351	hypothetical protein	Unknown function
345	+	211872	212180	309	hypothetical protein	Unknown function
346	+	212222	213847	1626	hypothetical protein	Unknown function
347	+	213849	214367	519	tail fiber assembly protein [Escherichia phage Ecwhy_1]	Structure and packaging/ morphogenesis	1	99.42%	QAY00451.1			172
348	+	214468	214773	306	hypothetical protein	Unknown function
349	+	214856	217861	1001	DNA-directed DNA polymerase [Escherichia phage PBECO4]	DNA replication/modification	1	94.51%	YP_009150826.1
350	+	217872	218012	141	hypothetical protein	Unknown function
351	+	218014	218316	303	hypothetical protein	Unknown function
352	+	218421	219152	732	hypothetical protein	Unknown function
353	+	219219	219425	207	hypothetical protein	Unknown function
354	+	219427	219729	303	hypothetical protein	Unknown function
355	+	219752	220447	696	hypothetical protein	Unknown function
356	-	220492	221181	690	hypothetical protein	Unknown function
357	-	221197	221796	600	hypothetical protein	Unknown function
358	+	222008	222994	987	RNase H-like 5'-3' exonuclease [Escherichia phage 121Q]	DNA replication/modification	0.99	92.97%	YP_009101595.1			345
359	+	222996	223481	486	hypothetical protein	Unknown function
360	+	223525	224211	687	hypothetical protein	Unknown function
361	+	224186	224527	342	terminase large subunit [Escherichia phage Ecwhy_1]	Structure and packaging/ morphogenesis	1	100.00%	QAY00437.1			114
362	+	224490	225827	1338	terminase large subunit [Escherichia phage Ecwhy_1]	Structure and packaging/ morphogenesis	1	100.00%	QAY00436.1			445
363	+	225860	227164	1305	hypothetical protein	Unknown function
364	+	227337	228386	1050	hypothetical protein	Unknown function
365	+	228456	229574	1119	recombination protein [Escherichia phage UB]	DNA replication, transcription, translation and nucleotide metabolism	1	94.89%	AXC36749.1			372
366	+	229574	230035	462	hypothetical protein	Unknown function
367	+	230083	230901	819	exodeoxyribonuclease X [Escherichia phage CMSTMSU]	DNA replication, transcription, translation and nucleotide metabolism	1	99.26%	AXC39241.1			272
368	+	230917	232401	1485	helicase [Escherichia phage PBECO4]	DNA replication, transcription, translation and nucleotide metabolism	0.94	96.37%	YP_009150808.1			468
369	+	232458	232886	429	hypothetical protein	Unknown function
370	+	232896	233393	498	hypothetical protein	Unknown function
371	+	233396	234241	846	hypothetical protein	Unknown function
372	+	234222	234932	711	hypothetical protein	Unknown function
373	+	234929	235258	330	hypothetical protein	Unknown function
374	+	235236	235874	639	hypothetical protein	Unknown function
375	-	235861	236214	354	hypothetical protein	Unknown function
376	+	236272	237249	978	hypothetical protein	Unknown function
377	+	237305	238360	1056	DNA primase subunit [Escherichia phage PBECO4]	DNA replication, transcription, translation and nucleotide metabolism	1	92.02%	YP_009150799.1			351
378	+	238387	239907	1521	helicase [Escherichia phage UB]	DNA replication, transcription, translation and nucleotide metabolism	1	92.11%	AXC36737.1			506
379	+	239911	240183	273	hypothetical protein	Unknown function
380	+	240185	240352	168	hypothetical protein	Unknown function
381	+	240349	240741	393	hypothetical protein	Unknown function
382	+	240799	241761	963	hypothetical protein	Unknown function
383	+	241761	241979	219	hypothetical protein	Unknown function
384	+	241976	242653	678	hypothetical protein	Unknown function
385	+	242687	243319	633	hypothetical protein	Unknown function
386	+	243336	243665	330	hypothetical protein	Unknown function
387	+	243712	244431	720	exonuclease [Escherichia phage Ecwhy_1]	DNA replication, transcription, translation and nucleotide metabolism	1	99.58%	QAY00412.1			239
388	+	244418	244975	558	hypothetical protein	Unknown function
389	+	245004	245585	582	hypothetical protein	Unknown function
390	+	245652	247970	2319	aerobic ribonucleoside diphosphate reductase large subunit [Escherichia phage UB]	DNA replication, transcription, translation and nucleotide metabolism	1	97.28%	AXC36725.1			772
391	+	248016	248789	774	hypothetical protein [Escherichia phage Ecwhy_1]	Unknown function						257
392	+	248802	249926	1125	aerobic ribonucleoside diphosphate reductase small subunit [Escherichia phage PBECO4]	DNA replication, transcription, translation and nucleotide metabolism	1	96.52%	YP_009150785.1			374
393	+	249975	250142	168	hypothetical protein	Unknown function
394	+	250205	250438	234	hypothetical protein	Unknown function
395	+	250453	250848	396	hypothetical protein	Unknown function
396	+	250848	251582	735	hypothetical protein	Unknown function
397	-	251626	251964	339	hypothetical protein	Unknown function
398	-	251987	252286	300	hypothetical protein	Unknown function
399	-	252303	252923	621	hypothetical protein	Unknown function
400	+	253117	253485	369	hypothetical protein	Unknown function
401	+	253473	253994	522	dihydrofolate reductase [Escherichia phage Ecwhy_1]	DNA replication, transcription, translation and nucleotide metabolism	1	100.00%	QAY00398.1			173
402	+	253991	254425	435	ribonuclease H [Escherichia phage PBECO4]	DNA replication, transcription, translation and nucleotide metabolism	0.97	85.71%	YP_009150776.1			142
403	+	254451	255791	1341	DNA helicase [Escherichia phage 121Q]	DNA replication, transcription, translation and nucleotide metabolism	1	95.96%	YP_009101638.1			446
404	+	255875	256441	567	hypothetical protein	Unknown function
405	+	256465	256659	195	hypothetical protein	Unknown function
406	+	256729	257232	504	hypothetical protein	Unknown function
407	+	257246	257791	546	hypothetical protein	Unknown function
408	+	257866	258411	546	hypothetical protein	Unknown function
409	+	258401	259972	1572	hypothetical protein	Unknown function
410	+	259972	260766	795	hypothetical protein	Unknown function
411	+	260866	262830	1965	topoisomerase II large subunit [Escherichia phage 121Q]	DNA replication, transcription, translation and nucleotide metabolism	1	96.48%	YP_009101646.1			654
412	+	262881	264293	1413	topoisomerase II medium subunit [Escherichia phage UB]	DNA replication, transcription, translation and nucleotide metabolism	1	94.04%	AXC36706.1			470
413	+	264382	266778	2397	hypothetical protein	Unknown function
414	+	266780	267091	312	hypothetical protein	Unknown function
415	+	267051	267569	519	hypothetical protein	Unknown function
416	+	267633	267977	345	hypothetical protein	Unknown function
417	+	267981	268307	327	hypothetical protein	Unknown function
418	+	268364	268633	270	hypothetical protein	Unknown function
419	+	268660	269613	954	replication factor C small subunit [Escherichia phage CMSTMSU]	DNA replication, transcription, translation and nucleotide metabolism	0.87	99.28%	AXC39157.1			282
420	+	269613	270239	627	hypothetical protein	Unknown function
421	+	270339	270905	567	hypothetical protein	Unknown function
422	+	270902	271582	681	hypothetical protein	Unknown function
423	+	271579	272397	819	hypothetical protein	Unknown function
424	+	272497	273624	1128	hypothetical protein	Unknown function
425	+	273709	274851	1143	hypothetical protein	Unknown function
426	+	274933	275622	690	putative peptidase [Escherichia phage PBECO4]	Additional function	1	83.41%	YP_009150752.1			229
427	+	275626	276720	1095	hypothetical protein	Unknown function
428	+	276717	277271	555	hypothetical protein	Unknown function
429	+	277319	277906	588	hypothetical protein	Unknown function
430	+	277890	278474	585	hypothetical protein	Unknown function
431	+	278477	278830	354	hypothetical protein	Unknown function
432	+	278833	279324	492	hypothetical protein	Unknown function
433	+	279317	279595	279	hypothetical protein	Unknown function
434	+	279576	279812	237	hypothetical protein	Unknown function
435	+	279886	280053	168	hypothetical protein	Unknown function
436	+	280050	280472	423	hypothetical protein	Unknown function
437	+	280469	280804	336	hypothetical protein	Unknown function
438	+	280801	280995	195	hypothetical protein	Unknown function
439	+	280999	281427	429	hypothetical protein	Unknown function
440	+	281483	282034	552	hypothetical protein	Unknown function
441	+	282192	282587	396	hypothetical protein	Unknown function
442	+	282643	283053	411	hypothetical protein	Unknown function
443	+	283055	283459	405	hypothetical protein	Unknown function
444	+	283461	283835	375	hypothetical protein	Unknown function
445	+	283835	284287	453	hypothetical protein	Unknown function
446	+	284281	284736	456	hypothetical protein	Unknown function
447	+	284751	285011	261	hypothetical protein	Unknown function
448	+	285008	285097	90	hypothetical protein	Unknown function
449	+	285090	285341	252	hypothetical protein	Unknown function						95
450	+	285394	286254	861	hypothetical protein	Unknown function
451	+	286257	286736	480	hypothetical protein	Unknown function
452	+	286781	287293	513	hypothetical protein	Unknown function
453	+	287290	287745	456	hypothetical protein	Unknown function
454	+	287745	288128	384	hypothetical protein	Unknown function
455	+	288125	288568	444	hypothetical protein	Unknown function
456	+	288571	288714	144	hypothetical protein	Unknown function
457	+	288728	288898	171	hypothetical protein	Unknown function
458	+	288898	289041	144	hypothetical protein	Unknown function
459	+	289099	289671	573	hypothetical protein	Unknown function
460	+	289658	289855	198	hypothetical protein	Unknown function
461	+	289858	290688	831	hypothetical protein	Unknown function
462	+	290685	290975	291	hypothetical protein	Unknown function
463	+	290975	291244	270	hypothetical protein	Unknown function
464	+	291237	291530	294	hypothetical protein	Unknown function
465	+	291652	291861	210	hypothetical protein	Unknown function
466	+	291927	292433	507	hypothetical protein	Unknown function
467	+	292433	292738	306	hypothetical protein	Unknown function
468	+	292761	292910	150	hypothetical protein	Unknown function
469	+	292961	293353	393	hypothetical protein	Unknown function
470	+	293402	293620	219	hypothetical protein	Unknown function
471	+	293622	294110	489	hypothetical protein	Unknown function
472	+	294107	294511	405	hypothetical protein	Unknown function
473	+	294501	294686	186	hypothetical protein	Unknown function
474	+	294683	294853	171	hypothetical protein	Unknown function
475	+	294864	295076	213	hypothetical protein	Unknown function
476	+	295227	295424	198	hypothetical protein	Unknown function
477	+	295435	295653	219	hypothetical protein	Unknown function
478	+	295675	295947	273	hypothetical protein	Unknown function
		295991	296080		tRNA-Ser (tga)	tRNA
479	+	296188	296352	165	hypothetical protein	Unknown function
480	+	296349	296513	165	hypothetical protein	Unknown function
481	+	296510	296674	165	hypothetical protein	Unknown function
482	+	296743	297108	366	hypothetical protein	Unknown function
483	+	297165	297404	240	hypothetical protein	Unknown function
484	+	297876	298247	372	hypothetical protein	Unknown function
		298297	298368		tRNA-Ser (ctg)	tRNA
		298523	298601		tRNA-Met (cat)	tRNA
		298606	298678		tRNA-Asn (gtt)	tRNA
485	+	298905	299162	258	hypothetical protein	Unknown function
486	+	299171	299386	216	hypothetical protein	Unknown function
487	+	299734	299847	114	hypothetical protein	Unknown function
		299924	299997		tRNA-Thr (tgt)	tRNA
		300004	300077		tRNA-Thr (tgt)	tRNA
488	+	300094	300510	417	hypothetical protein	Unknown function
489	+	300503	300862	360	hypothetical protein	Unknown function
490	+	300876	301067	192	hypothetical protein	Unknown function
491	+	301067	301351	285	hypothetical protein	Unknown function
492	+	301591	302007	417	hypothetical protein	Unknown function
493	+	302038	302487	450	hypothetical protein	Unknown function
494	+	302477	302923	447	hypothetical protein	Unknown function
495	+	302935	303354	420	hypothetical protein	Unknown function
496	+	303351	303716	366	hypothetical protein	Unknown function
497	+	303697	303870	174	hypothetical protein	Unknown function
498	+	303871	304212	342	hypothetical protein	Unknown function
499	+	304224	305039	816	hypothetical protein	Unknown function
500	-	305084	306241	1158	hypothetical protein	Unknown function
501	+	306358	306942	585	hypothetical protein	Unknown function
502	+	306939	307166	228	hypothetical protein	Unknown function
503	+	307169	307627	459	hypothetical protein	Unknown function
504	+	307624	308067	444	hypothetical protein	Unknown function
505	+	308121	308579	459	hypothetical protein	Unknown function
506	+	308579	309001	423	hypothetical protein	Unknown function
507	+	308998	309423	426	hypothetical protein	Unknown function
508	+	309483	309734	252	hypothetical protein	Unknown function
509	+	309809	310069	261	hypothetical protein	Unknown function
510	+	310075	310494	420	hypothetical protein	Unknown function
511	+	310496	310993	498	hypothetical protein	Unknown function
512	+	311016	311984	969	RNA polymerase sigma factor [Escherichia phage 121Q]	DNA replication, transcription, translation and nucleotide metabolism	0.99	58.70%	YP_009101754.1			321
513	+	312645	312854	210	hypothetical protein	Unknown function
514	+	312851	313078	228	hypothetical protein	Unknown function
515	+	313079	313873	795	hypothetical protein	Unknown function
516	+	313888	314070	183	hypothetical protein	Unknown function
517	+	314080	314280	201	hypothetical protein	Unknown function
518	+	314450	314728	279	hypothetical protein	Unknown function
519	+	314847	315155	309	hypothetical protein	Unknown function
520	+	315155	315406	252	hypothetical protein	Unknown function
521	+	315403	315771	369	hypothetical protein	Unknown function
522	+	315768	316043	276	hypothetical protein	Unknown function
523	+	316043	316258	216	hypothetical protein	Unknown function
524	+	316255	316401	147	hypothetical protein	Unknown function
525	+	316412	316612	201	hypothetical protein	Unknown function
526	+	316612	317127	516	hypothetical protein	Unknown function
527	+	317124	317345	222	hypothetical protein	Unknown function
528	+	317349	317567	219	hypothetical protein	Unknown function
529	+	317560	317772	213	hypothetical protein	Unknown function
530	+	317807	318469	663	hypothetical protein	Unknown function
531	+	318460	318702	243	hypothetical protein	Unknown function
532	+	318761	319087	327	hypothetical protein	Unknown function
533	+	319166	319531	366	hypothetical protein	Unknown function
534	+	319542	319925	384	hypothetical protein	Unknown function
535	+	319922	320272	351	hypothetical protein	Unknown function
536	+	320277	320468	192	hypothetical protein	Unknown function
537	+	320524	320964	441	hypothetical protein	Unknown function
538	+	320957	321301	345	hypothetical protein	Unknown function
539	+	321316	321582	267	hypothetical protein	Unknown function
540	+	321594	321887	294	hypothetical protein	Unknown function
541	+	321938	322162	225	hypothetical protein	Unknown function
542	+	322233	322469	237	hypothetical protein	Unknown function
543	+	322524	323096	573	hypothetical protein	Unknown function
544	+	323110	323553	444	hypothetical protein	Unknown function
545	+	323665	324048	384	hypothetical protein	Unknown function
546	+	324136	324249	114	hypothetical protein	Unknown function
547	+	324258	324521	264	hypothetical protein	Unknown function
548	+	324518	324814	297	hypothetical protein	Unknown function
549	+	324920	326407	1488	hypothetical protein	Unknown function
550	+	326479	326730	252	hypothetical protein	Unknown function
551	+	326717	327091	375	hypothetical protein	Unknown function
552	+	327158	327571	414	hypothetical protein	Unknown function
553	+	327583	327858	276	hypothetical protein	Unknown function
554	+	327868	328206	339	hypothetical protein	Unknown function
555	+	328216	328557	342	hypothetical protein	Unknown function
556	+	328559	328903	345	hypothetical protein	Unknown function
557	+	328912	329169	258	hypothetical protein	Unknown function
558	+	329169	329429	261	hypothetical protein	Unknown function
559	+	329438	329548	111	hypothetical protein	Unknown function
560	+	329625	330179	555	hypothetical protein	Unknown function
561	+	330191	330367	177	hypothetical protein	Unknown function
562	+	330396	330647	252	hypothetical protein	Unknown function
563	+	330658	331029	372	hypothetical protein	Unknown function
564	+	331031	331303	273	hypothetical protein	Unknown function
565	+	331308	331577	270	hypothetical protein	Unknown function
566	+	331632	332147	516	endonuclease [Escherichia phage UB]	DNA replication, transcription, translation and nucleotide metabolism	1	94.74%	AXC36568.1			171
567	+	332213	332455	243	hypothetical protein	Unknown function
568	+	332442	333857	1416	hypothetical protein	Unknown function
569	+	333808	334905	1098	hypothetical protein	Unknown function
570	+	334975	335745	771	hypothetical protein	Unknown function
571	+	335813	336151	339	hypothetical protein	Unknown function
572	+	336151	336498	348	hypothetical protein	Unknown function
573	+	336498	336833	336	hypothetical protein	Unknown function
574	+	336833	337147	315	hypothetical protein	Unknown function
575	+	337147	337515	369	hypothetical protein	Unknown function
576	+	337517	337879	363	hypothetical protein	Unknown function
577	+	337881	338252	372	hypothetical protein	Unknown function
578	-	338289	339413	1125	hypothetical protein	Unknown function						374
579	+	339491	340141	651	hypothetical protein	Unknown function
580	-	340174	341310	1137	hypothetical protein	Unknown function						378
581	-	341325	342473	1149	hypothetical protein	Unknown function
582	-	342544	343695	1152	hypothetical protein	Unknown function
583	-	343773	344903	1131	hypothetical protein	Unknown function
584	-	344981	346090	1110	hypothetical protein	Unknown function
585	-	346162	346899	738	hypothetical protein	Unknown function
586	-	346971	348161	1191	hypothetical protein	Unknown function
587	-	348232	349374	1143	regulator of chromosome condensation-like protein [Escherichia phage UB]	Structure and packaging/ morphogenesis	1	95.79%	AXC36548.1			380
588	-	349446	350555	1110	hypothetical protein	Unknown function
589	-	350566	351696	1131	hypothetical protein	Unknown function
590	-	351771	352952	1182	hypothetical protein	Unknown function
591	-	352962	354155	1194	regulator of chromosome condensation RCC1 [Escherichia phage SP27]	Structure and packaging/ morphogenesis	0.99	72.93%	BBM61813.1			400
592	-	354219	355373	1155	hypothetical protein	Unknown function
593	-	355447	356595	1149	regulator of chromosome condensation [Escherichia phage vB_EcoM_phAPEC6]	Structure and packaging/ morphogenesis	1	93.98%	QDF14172.1			382
594	-	356608	357513	906	hypothetical protein	Unknown function
595	+	357617	357844	228	hypothetical protein	Unknown function
596	+	358252	358464	213	hypothetical protein	Unknown function
597	+	358657	358839	183	hypothetical protein	Unknown function
598	+	359229	359417	189	hypothetical protein	Unknown function
599	+	359616	360275	660	hypothetical protein	Unknown function
600	+	360268	360450	183	hypothetical protein	Unknown function
601	+	360452	360631	180	hypothetical protein	Unknown function
602	+	361023	361211	189	hypothetical protein	Unknown function
603	+	361222	361428	207	hypothetical protein	Unknown function
604	+	361469	361609	141	hypothetical protein	Unknown function
605	+	362200	362382	183	hypothetical protein	Unknown function
606	+	362394	362600	207	hypothetical protein	Unknown function
607	+	364660	365022	363	hypothetical protein	Unknown function
608	+	365117	365350	234	hypothetical protein	Unknown function
609	+	365433	365672	240	hypothetical protein	Unknown function
610	+	365759	366025	267	hypothetical protein	Unknown function
611	+	366113	366343	231	hypothetical protein	Unknown function
612	+	366770	367381	612	hypothetical protein	Unknown function
613	+	367473	367712	240	hypothetical protein	Unknown function
614	+	367770	368030	261	hypothetical protein	Unknown function
615	+	368087	368338	252	hypothetical protein	Unknown function
616	+	368582	368818	237	hypothetical protein	Unknown function
617	+	368903	369202	300	hypothetical protein	Unknown function
618	+	369224	369454	231	hypothetical protein	Unknown function
619	+	369688	370170	483	hypothetical protein	Unknown function
620	+	370455	370682	228	hypothetical protein	Unknown function
621	+	370769	370912	144	hypothetical protein	Unknown function
622	+	370992	371204	213	hypothetical protein	Unknown function
623	+	371294	371617	324	hypothetical protein	Unknown function
624	+	371698	371967	270	hypothetical protein	Unknown function
625	+	372019	372291	273	hypothetical protein	Unknown function
626	+	372297	372506	210	hypothetical protein	Unknown function
627	+	372576	372722	147	hypothetical protein	Unknown function
628	+	372804	372956	153	hypothetical protein	Unknown function
629	+	373043	373162	120	hypothetical protein	Unknown function
630	+	373377	373718	342	hypothetical protein	Unknown function
631	+	373810	374022	213	hypothetical protein	Unknown function
632	+	374106	374285	180	hypothetical protein	Unknown function
633	+	374385	374528	144	hypothetical protein	Unknown function
634	+	374634	374831	198	hypothetical protein	Unknown function
635	+	375017	375163	147	hypothetical protein	Unknown function						48
636	+	375163	375420	258	DksA C4-type domain-containing protein [Escherichia phage vB_EcoM_phAPEC6]	Additional function	1	96.47%	QDF14136.1			85
637	+	375502	375690	189	hypothetical protein	Unknown function
638	+	375718	376041	324	hypothetical protein	Unknown function
639	+	376125	376337	213	hypothetical protein	Unknown function
640	+	376355	376447	93	hypothetical protein	Unknown function
641	+	376444	376617	174	hypothetical protein	Unknown function
642	+	376614	376763	150	hypothetical protein	Unknown function
643	+	377079	377354	276	hypothetical protein	Unknown function
644	+	377441	377623	183	hypothetical protein	Unknown function
645	+	377712	378035	324	hypothetical protein	Unknown function
646	+	378131	378526	396	hypothetical protein	Unknown function
647	+	378589	378843	255	hypothetical protein	Unknown function
648	+	378897	379115	219	hypothetical protein	Unknown function
649	+	379173	379415	243	hypothetical protein	Unknown function
650	+	379447	380031	585	hypothetical protein	Unknown function
651	+	380255	380476	222	hypothetical protein	Unknown function
652	+	380561	380833	273	hypothetical protein	Unknown function
653	+	380830	381021	192	hypothetical protein	Unknown function
654	+	381108	381371	264	hypothetical protein	Unknown function
655	+	381439	381663	225	hypothetical protein	Unknown function
656	-	381655	381741	87	hypothetical protein	Unknown function
657	+	381740	381997	258	hypothetical protein	Unknown function
658	+	382240	382572	333	hypothetical protein	Unknown function
659	+	382662	383063	402	hypothetical protein	Unknown function
660	+	383132	383341	210	hypothetical protein	Unknown function
